# Supplementary material for: Dinuclear ruthenium acetylide complexes with diethynylated anthrahydroquinone and anthraquinone frameworks: a multi-stimuli-responsive organometallic switch
Source: Royal Society of Chemistry journal article supplement (doi:10.1039/c9dt01255a), 2019-01-01
Supplement: c9dt01255a1.pdf [file c9dt01255a1.pdf]

## Electronic Supplementary Information

### Dinuclear Ruthenium Acetylide Complexes with Diethynylated Anthrahydroquinone and Anthraquinone Frameworks: A Multi-Stimuli-Responsive Organometallic Switch

Yosuke Oyama, Reo Kawano, Yuya Tanaka,\* Munetaka Akita\*

*Laboratory for Chemistry and Life Science, Tokyo Institute of Technology, 4259 Nagatsuta  
Midori-ku, Yokohama 226-8503, Japan*

**E-mails: [ytanaka@res.titech.ac.jp](mailto:ytanaka@res.titech.ac.jp), [makita@res.titech.ac.jp](mailto:makita@res.titech.ac.jp)**

#### Table of Contents

|                                                                                                                                    |           |
|------------------------------------------------------------------------------------------------------------------------------------|-----------|
| <b>I. NMR and MS spectroscopic data</b>                                                                                            | <b>S3</b> |
| <b>Figure S1a.</b> A $^1\text{H}$ NMR spectrum of <b>6</b> (500 MHz, $\text{CDCl}_3$ , r.t.).                                      |           |
| <b>Figure S1b.</b> A $^{13}\text{C}\{^1\text{H}\}$ NMR spectrum of <b>6</b> (126 MHz, $\text{CDCl}_3$ , r.t.).                     |           |
| <b>Figure S1c.</b> ESI-TOF MS spectra of <b>6</b> .                                                                                |           |
| <b>Figure S2a.</b> A $^1\text{H}$ NMR spectrum of <b>7</b> (500 MHz, $\text{CDCl}_3$ , r.t.).                                      |           |
| <b>Figure S2b.</b> A $^{13}\text{C}\{^1\text{H}\}$ NMR spectrum of <b>7</b> (126 MHz, $\text{CDCl}_3$ , r.t.).                     |           |
| <b>Figure S2c.</b> A MALDI-TOF MS spectrum of <b>7</b> .                                                                           |           |
| <b>Figure S3a.</b> A $^1\text{H}$ NMR spectrum of <b>1<sup>Cl</sup></b> (400 MHz, $\text{C}_6\text{D}_6$ , r.t.).                  |           |
| <b>Figure S3b.</b> A $^{31}\text{P}\{^1\text{H}\}$ NMR spectrum of <b>1<sup>Cl</sup></b> (162 MHz, $\text{C}_6\text{D}_6$ , r.t.). |           |
| <b>Figure S3c.</b> ESI-TOF MS spectra of <b>1<sup>Cl</sup></b> .                                                                   |           |
| <b>Figure S4a.</b> A $^1\text{H}$ NMR spectrum of <b>2<sup>Cl</sup></b> (400 MHz, $\text{CDCl}_3$ , r.t.).                         |           |
| <b>Figure S4b.</b> A $^{31}\text{P}\{^1\text{H}\}$ NMR spectrum of <b>2<sup>Cl</sup></b> (162 MHz, $\text{CDCl}_3$ , r.t.).        |           |
| <b>Figure S4c.</b> ESI-TOF MS spectra of <b>2<sup>Cl</sup></b> .                                                                   |           |
| <b>Figure S5a.</b> A $^1\text{H}$ NMR spectrum of <b>3<sup>Cl</sup></b> (400 MHz, $\text{CDCl}_3$ , r.t.).                         |           |
| <b>Figure S5b.</b> A $^{31}\text{P}\{^1\text{H}\}$ NMR spectrum of <b>3<sup>Cl</sup></b> (162 MHz, $\text{CDCl}_3$ , r.t.).        |           |
| <b>Figure S5c.</b> ESI-TOF-MS spectra of <b>3<sup>Cl</sup></b> .                                                                   |           |
| <b>Figure S6a.</b> A $^1\text{H}$ NMR spectrum of <b>1<sup>C<sup>4</sup>TMS</sup></b> (400 MHz, $\text{C}_6\text{D}_6$ , r.t.).    |           |
| <b>Figure S6b.</b> A $^{31}\text{P}$ NMR spectrum of <b>1<sup>C<sup>4</sup>TMS</sup></b> (162 MHz, $\text{C}_6\text{D}_6$ , r.t.). |           |

**Figure S6c.** ESI-TOF MS spectra of  $1^{C4TMS}$ .  
**Figure S7a.** A  $^1H$  NMR spectrum of  $2^{C4TMS}$  (400 MHz,  $CDCl_3$ , r.t.).  
**Figure S7b.** A  $^{31}P$   $\{^1H\}$  NMR spectrum of  $2^{C4TMS}$  (162 MHz,  $CDCl_3$ , r.t.)  
**Figure S7c.** ESI-TOF MS spectra of  $2^{C4TMS}$ .  
**Figure S8a.** A  $^1H$  NMR spectrum of  $3^{C4TMS}$  (400 MHz,  $CDCl_3$ , r.t.).  
**Figure S8b.** A  $^{31}P$  NMR spectrum of  $3^{C4TMS}$  (162 MHz,  $CDCl_3$ , r.t.).  
**Figure S8c.** ESI-TOF MS spectra of  $3^{C4TMS}$ .  
**Figure S9a.** A  $^1H$  NMR spectrum of **4** (400 MHz,  $C_6D_6$ , r.t.).  
**Figure S9b.** A  $^{31}P$  NMR spectrum of **4** (162 MHz,  $C_6D_6$ , r.t.).  
**Figure S9c.** ESI-TOF MS spectra of **4**.  
**Figure S10a.**  $^1H$  NMR spectrum of **5** (400 MHz,  $CDCl_3$ , r.t.)  
**Figure S10b.** A  $^{31}P$  NMR spectrum of **5** (162 MHz,  $CDCl_3$ , r.t.)  
**Figure S10c.** ESI-TOF MS spectra of **5**.

## II. Single-crystal X-ray crystallography

S25

## III. Electrochemical, spectroscopic and theoretical data

S26

**Figure S11a.** CV and DPV charts for  $1^{C4}$ - $3^{C4}$ .

**Figure S11d.** CV and DPV charts for **4** and **5**.

**Figure S12.** UV-Vis-NIR spectral changes of  $3^{Cl}$  upon addition of magic blue as observed in  $CH_2Cl_2$ . Spectral changes for (a)  $3^{Cl}$  to  $[3^{Cl}]^+$  and (b)  $[3^{Cl}]^+$  to  $[3^{Cl}]^{2+}$ .

**Figure S13.** Normalized NIR spectra of  $[1^{Cl}]^+$  (blue solid; in  $CH_2Cl_2$ , red dashed; in  $CH_3CN$ ).

**Figure S14.** UV-Vis-NIR spectral changes of  $[1^{C4}]^+$  -  $[3^{C4}]^+$  observed in  $CH_2Cl_2$ . The spectral changes were completed within 10 min at room temperature.

**Table S1.** UV-Vis-NIR spectral data of  $[3^R]^{n+}$  (R = Cl, C<sub>4</sub>, n = 0-2) observed in  $CH_2Cl_2$ .

**Figure S15.** (left) HOMO-LUMO energy levels of Kohn-Sham frontier orbitals of **3'** obtained at the B3LYP/LanL2DZ(Ru), 6-31G(d) levels of theory combined with the CPCM continuum solvent method ( $CH_2Cl_2$ ). (right) Orbital distributions of LUMOs and HOMOs.

**Figure S16.** (a) Spin density distributions of the models of  $[3'^R]^+$  (R = Cl, C<sub>4</sub>) at the BLYP35/Def2SVP levels of theory combined with the CPCM continuum solvent methods ( $CH_2Cl_2$ ).

**Figure S17.** Natural transition orbitals (NTO) of the lowest-energy transitions for (a)  $[1'^{Cl}]^+$  and (b)  $[3'^{Cl}]^+$  obtained by the TDDFT at the BLYP35/Def2SVP levels of theory with CPCM ( $CH_2Cl_2$ ).

**Figure S18.** Protonation and deprotonation reactions with TFA and  $NEt_3$  of  $1^{Cl}$  and  $2^{Cl}$  recorded in  $CH_2Cl_2$ .

**Table S2.** Cartesian coordinates of optimized geometry of  $1'^{Cl}$ .

**Table S3.** Cartesian coordinates of optimized geometry of  $2'^{Cl}$ .

**Table S4.** Cartesian coordinates of optimized geometry of  $3'^{Cl}$ .

**Table S5.** Cartesian coordinates of optimized geometry of  $1'^{C4}$ .

**Table S6.** Cartesian coordinates of optimized geometry of  $\mathbf{2}^{\text{C4}}$ .

**Table S7.** Cartesian coordinates of optimized geometry of  $\mathbf{3}^{\text{C4}}$ .

**Table S8.** Cartesian coordinates of optimized geometry of  $[\mathbf{1}^{\text{Cl}}]^+$ .

**Table S9.** Cartesian coordinates of optimized geometry of  $[\mathbf{2}^{\text{Cl}}]^+$ .

**Table S10.** Cartesian coordinates of optimized geometry of  $[\mathbf{3}^{\text{Cl}}]^+$ .

**Table S11.** Cartesian coordinates of optimized geometry of  $[\mathbf{1}^{\text{C4}}]^+$ .

**Table S12.** Cartesian coordinates of optimized geometry of  $[\mathbf{2}^{\text{C4}}]^+$ .

**Table S13.** Cartesian coordinates of optimized geometry of  $[\mathbf{3}^{\text{C4}}]^+$ .

## I. NMR and MS spectroscopic data

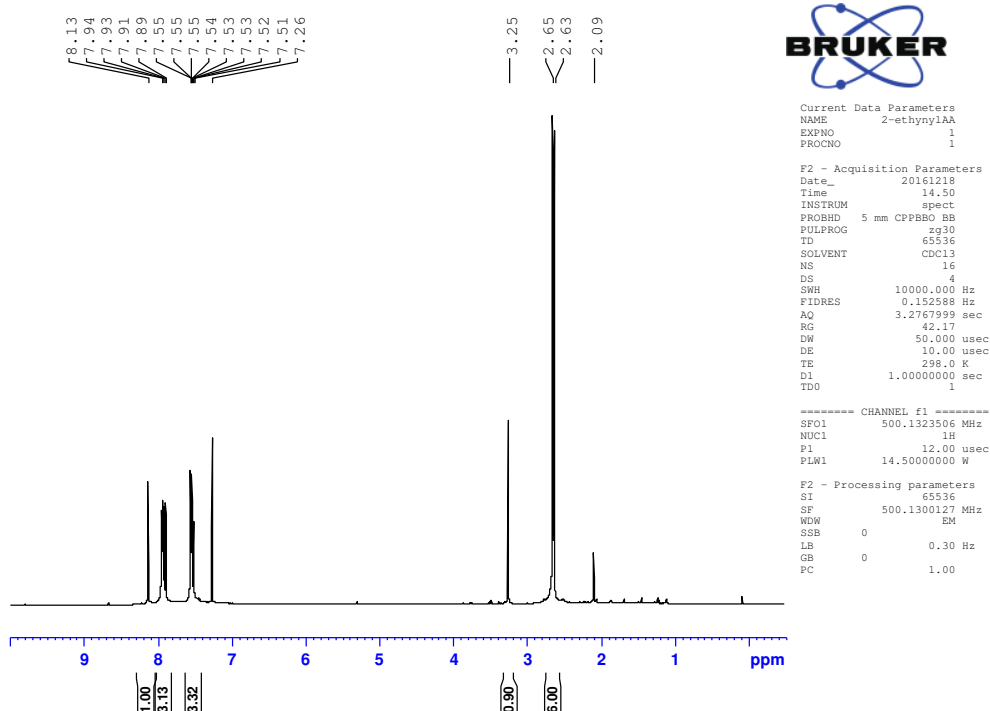

Figure S1a. A  $^1\text{H}$  NMR spectrum of **6** (500 MHz,  $\text{CDCl}_3$ , r.t.).

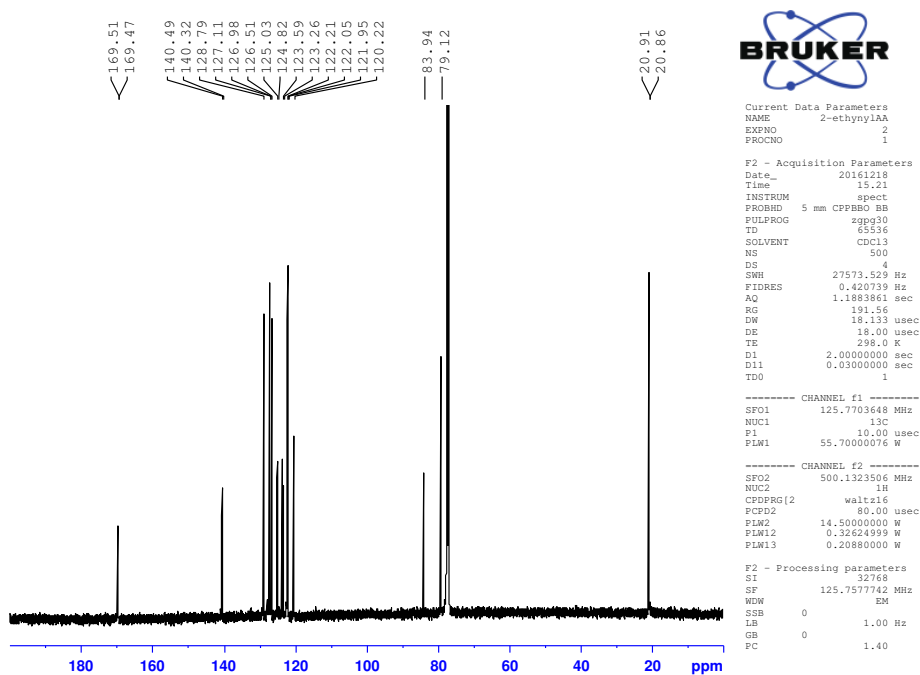

Figure S1b. A  $^{13}\text{C}\{^1\text{H}\}$  NMR spectrum of **6** (126 MHz,  $\text{CDCl}_3$ , r.t.).



## Display Report

### Analysis Info

Analysis Name D:\Data\akita\15Oyama\2-ethynylAA\Acq000001.d  
Method esi\_posi\_low.m  
Sample Name AA  
Comment

Acquisition Date 2017/03/22 15:16:30

Operator BDAL@DE  
Instrument micrOTOF 213750.10321

### Acquisition Parameter

|             |            |                      |          |                  |           |
|-------------|------------|----------------------|----------|------------------|-----------|
| Source Type | ESI        | Ion Polarity         | Positive | Set Nebulizer    | 0.3 Bar   |
| Focus       | Not active |                      |          | Set Dry Heater   | 180 °C    |
| Scan Begin  | 50 m/z     | Set Capillary        | 4500 V   | Set Dry Gas      | 4.0 l/min |
| Scan End    | 1000 m/z   | Set End Plate Offset | -500 V   | Set Divert Valve | Waste     |

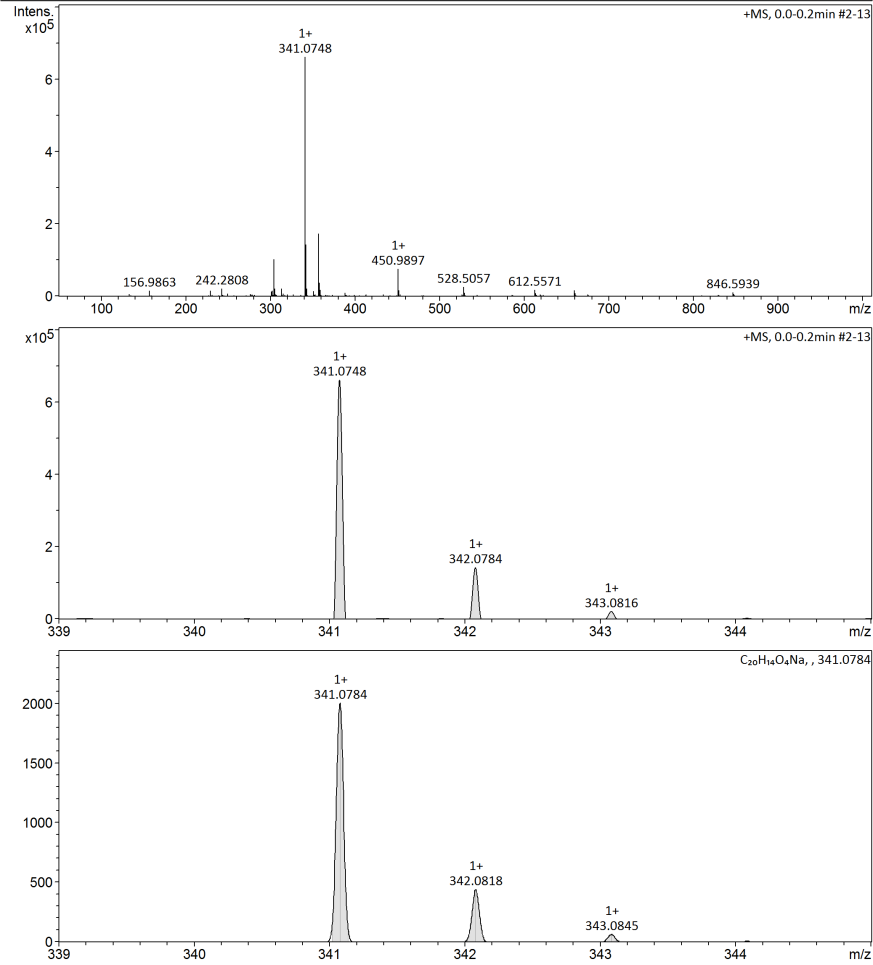

Bruker Compass DataAnalysis 4.2

printed: 2017/03/29 15:12:10

by: BDAL@DE

1 of 1

Figure S1c. ESI-TOF MS spectra of 6.

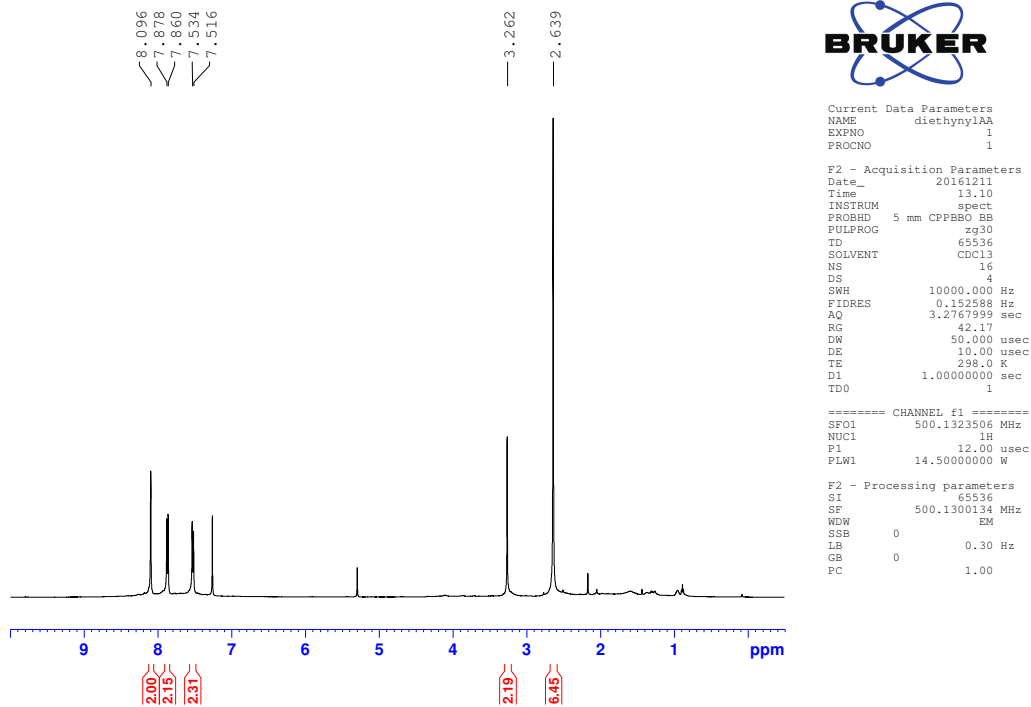

Figure S2a. A  $^1\text{H}$  NMR spectrum of **7** (500 MHz,  $\text{CDCl}_3$ , r.t.).

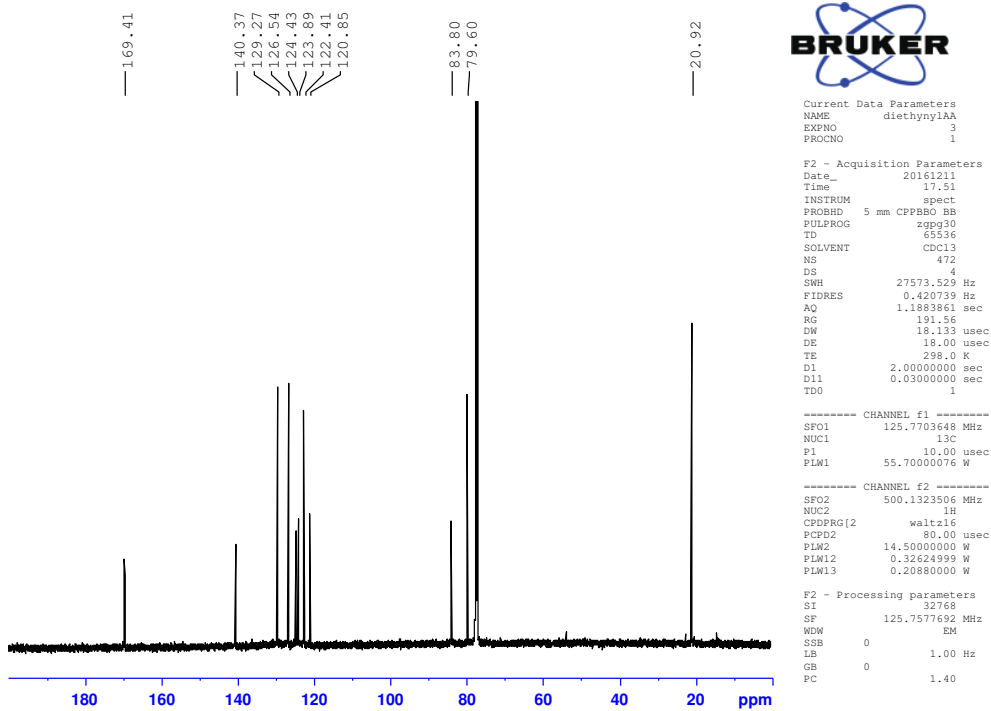

Figure S2b. A  $^{13}\text{C}\{^1\text{H}\}$  NMR spectrum of **7** (126 MHz,  $\text{CDCl}_3$ , r.t.).

YO-47

Data: YO-47-dith-1-10-0001.K6[c] 28 Aug 2015 1:02 C<sub>z</sub> akita-yoshizawa-ref 28 Au 2015 1C 3  
Shimadzu Biotech Axima CFRplus 2.9.3.20110624: Mode Reflectron, Power: 90, P.Ext. @ 342 (bin 52)

%Int. 25 mV[sum= 2668 mV] Profiles 1-105 Smooth Gauss 1

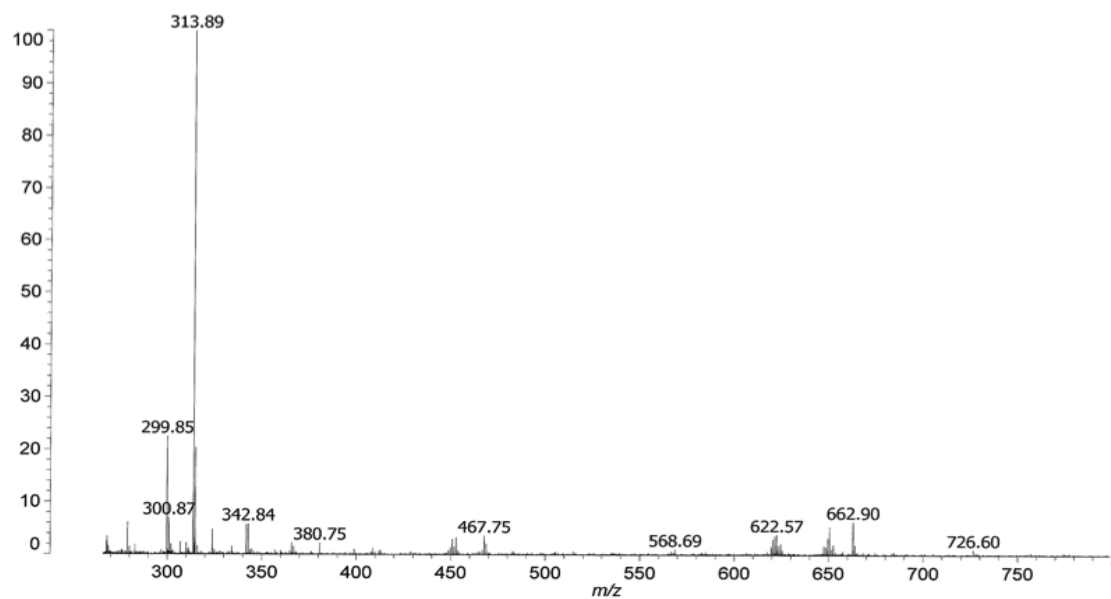

**Figure S2c.** A MALDI-TOF MS spectrum of **7**.

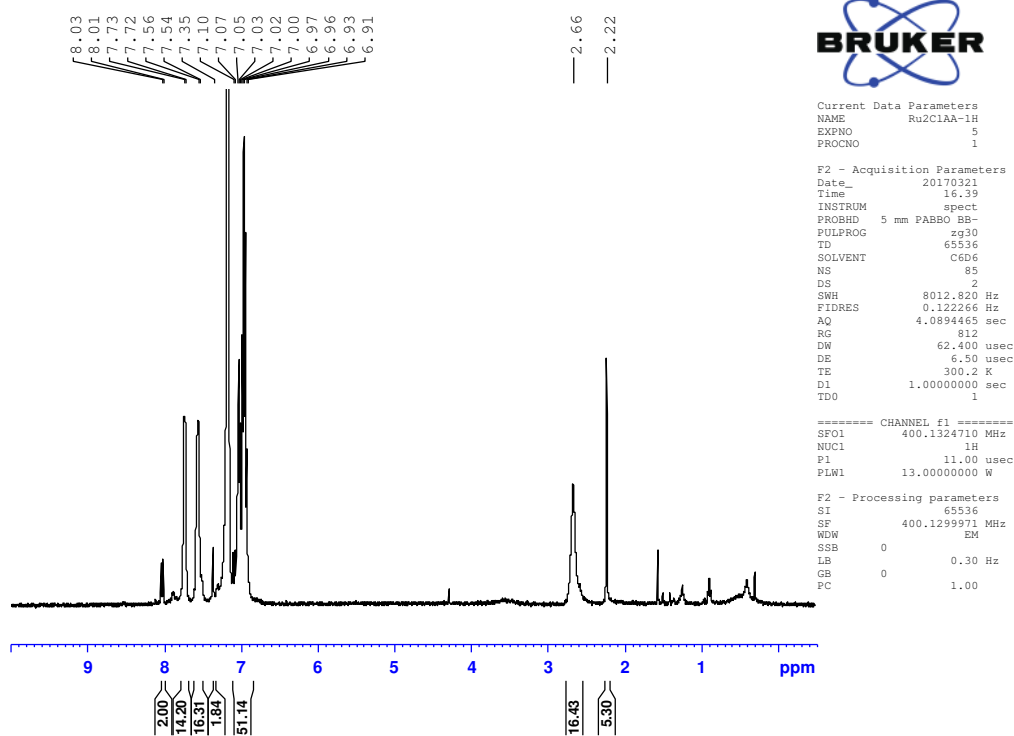

Figure S3a. A <sup>1</sup>H NMR spectrum of **1**<sup>Cl</sup> (400 MHz, C<sub>6</sub>D<sub>6</sub>, r.t.).

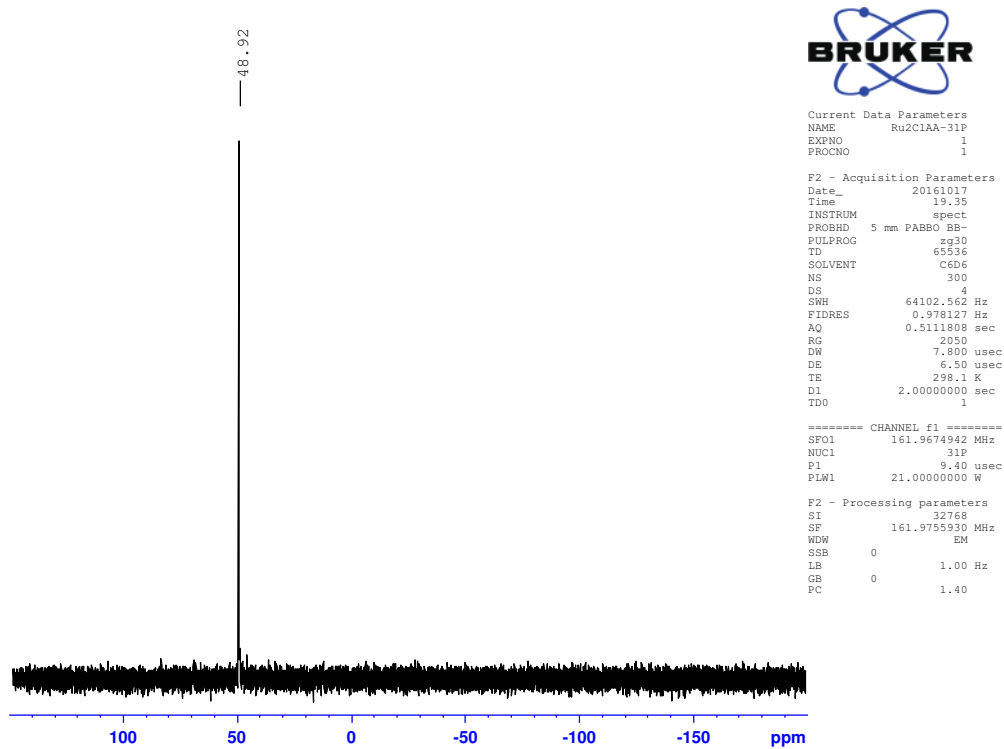

Figure S3b. A <sup>31</sup>P {<sup>1</sup>H} NMR spectrum of **1**<sup>Cl</sup> (162 MHz, C<sub>6</sub>D<sub>6</sub>, r.t.).

# Display Report

## Analysis Info

Analysis Name D:\Data\akita\15Oyama\Ru2CIAA-hiMS\Ru2CIAA-hiMS\_2\Acq000001.d Acquisition Date 2017/03/15 20:37:11  
Method esi\_posi\_high.m Operator BDAL@DE  
Sample Name Ru2CIAA Instrument micrOTOF 213750.10321  
Comment

## Acquisition Parameter

|             |            |                      |          |                  |           |
|-------------|------------|----------------------|----------|------------------|-----------|
| Source Type | ESI        | Ion Polarity         | Positive | Set Nebulizer    | 0.3 Bar   |
| Focus       | Not active |                      |          | Set Dry Heater   | 160 °C    |
| Scan Begin  | 50 m/z     | Set Capillary        | 4500 V   | Set Dry Gas      | 7.0 l/min |
| Scan End    | 4500 m/z   | Set End Plate Offset | -500 V   | Set Divert Valve | Waste     |

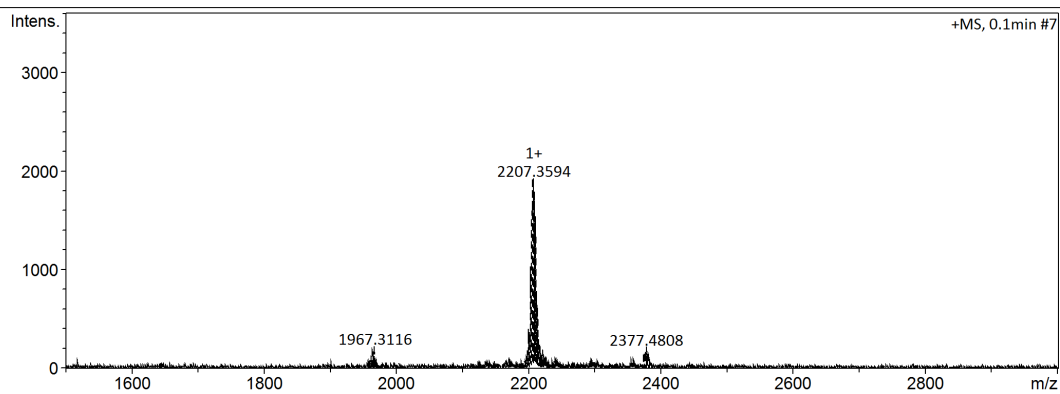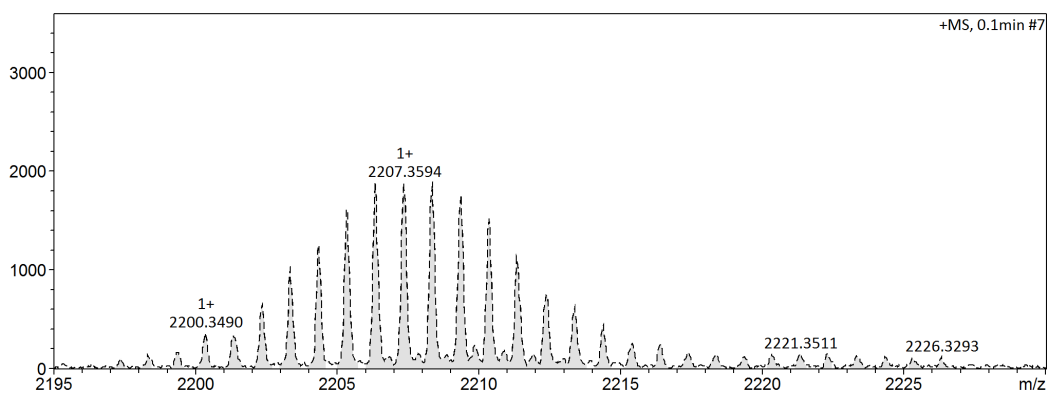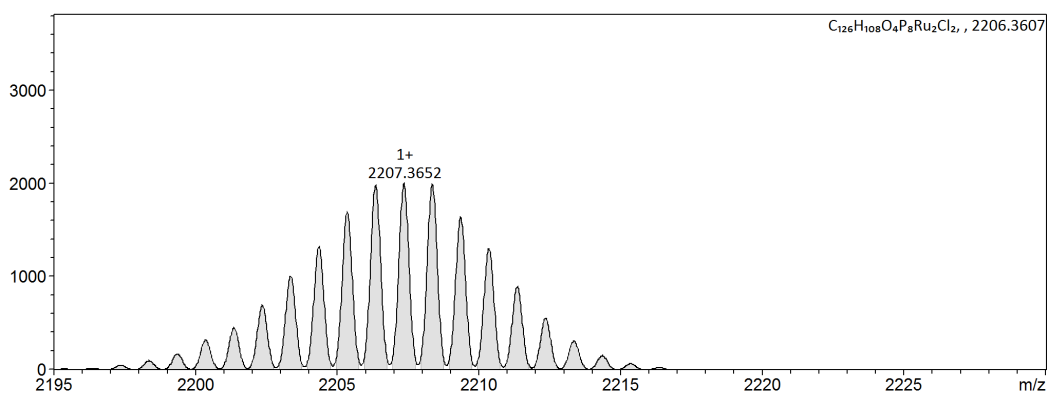

Figure S3c. ESI-TOF MS spectra of 1<sup>Cl</sup>.

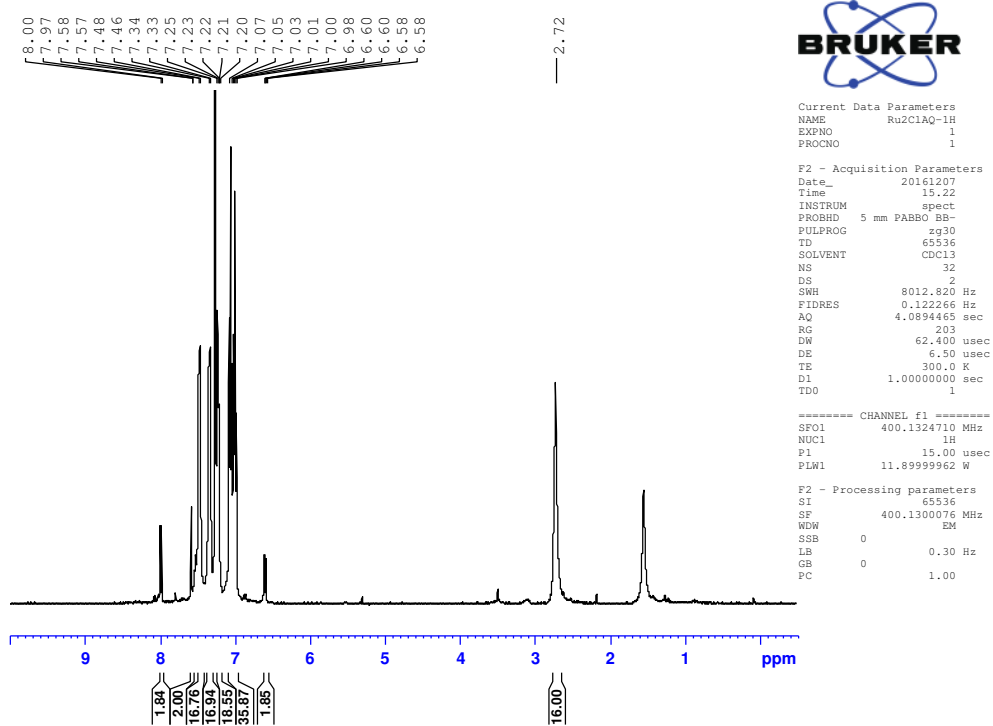

Figure S4a. A  $^1\text{H}$  NMR spectrum of  $2^{\text{Cl}}$  (400 MHz,  $\text{CDCl}_3$ , r.t.).

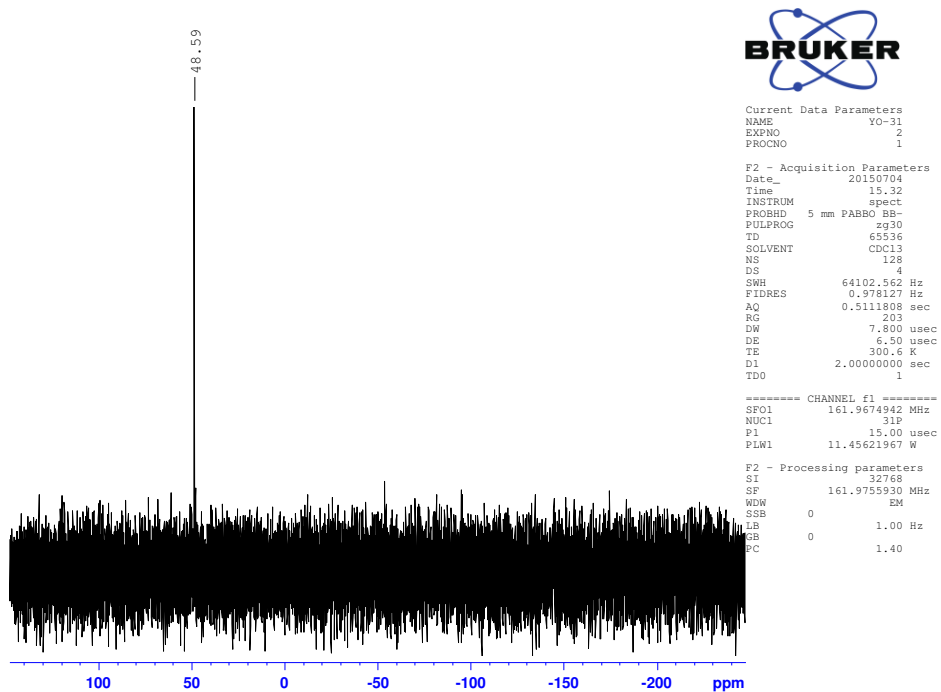

Figure S4b. A  $^{31}\text{P}$   $\{^1\text{H}\}$  NMR spectrum of  $2^{\text{Cl}}$  (162 MHz,  $\text{CDCl}_3$ , r.t.).

## Display Report

**Analysis Info**  
Analysis Name D:\Data\akita\15Oyama\Ru2CIAQ-hims\Acq000002.d Acquisition Date 2017/03/07 19:58:48  
Method esi\_posi\_high.m Operator BDAL@DE  
Sample Name Ru2CIAQ Instrument micrOTOF 213750.10321  
Comment

**Acquisition Parameter**  
Source Type ESI Ion Polarity Positive Set Nebulizer 0.3 Bar  
Focus Not active Set Dry Heater 160 °C  
Scan Begin 50 m/z Set Capillary 4500 V Set Dry Gas 5.0 l/min  
Scan End 6000 m/z Set End Plate Offset -500 V Set Divert Valve Waste

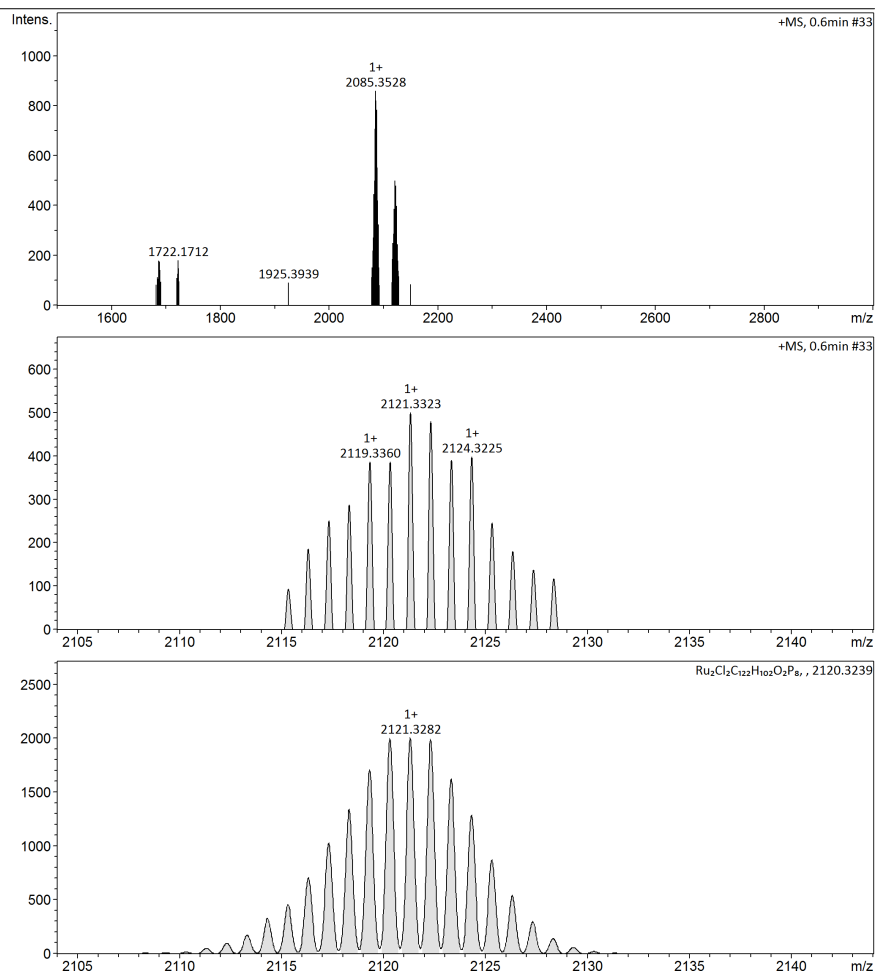

Bruker Compass DataAnalysis 4.2 printed: 2017/03/22 17:19:23 by: BDAL@DE 1 of 1

**Figure S4c.** ESI-TOF MS spectra of  $2^{Cl1}$ .

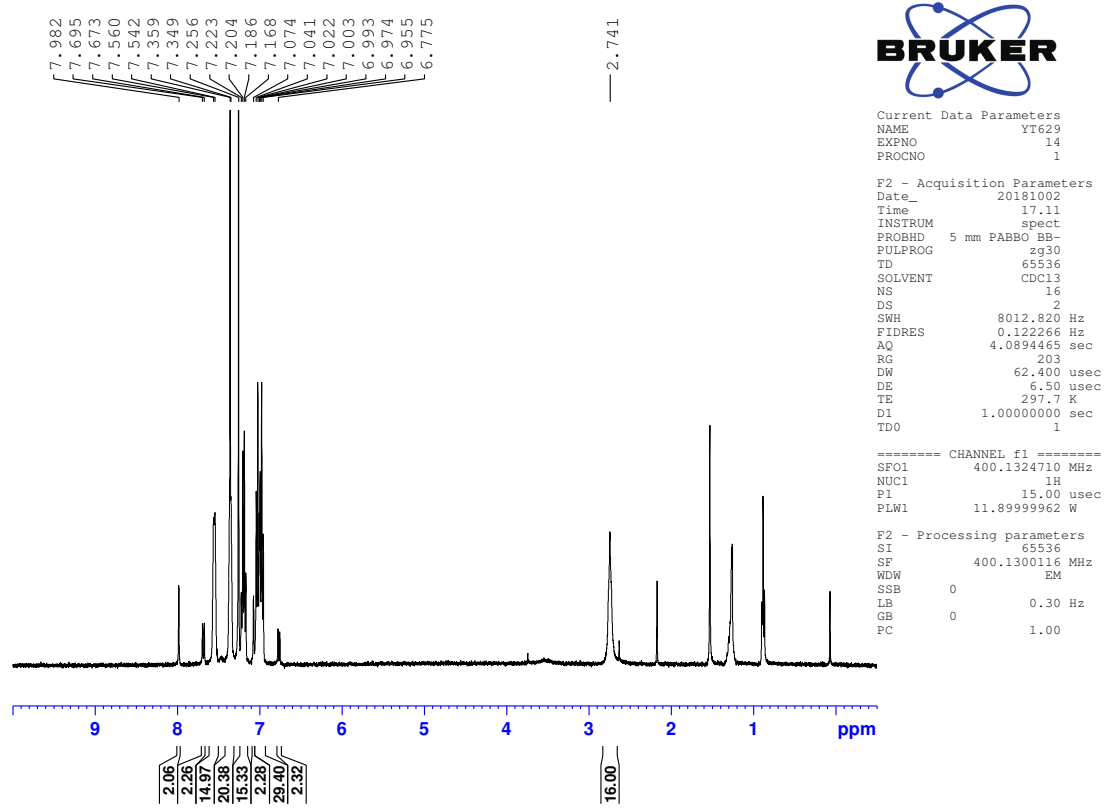

Figure S5a. A <sup>1</sup>H NMR spectrum of 3<sup>Cl</sup> (400 MHz, CDCl<sub>3</sub>, r.t.).



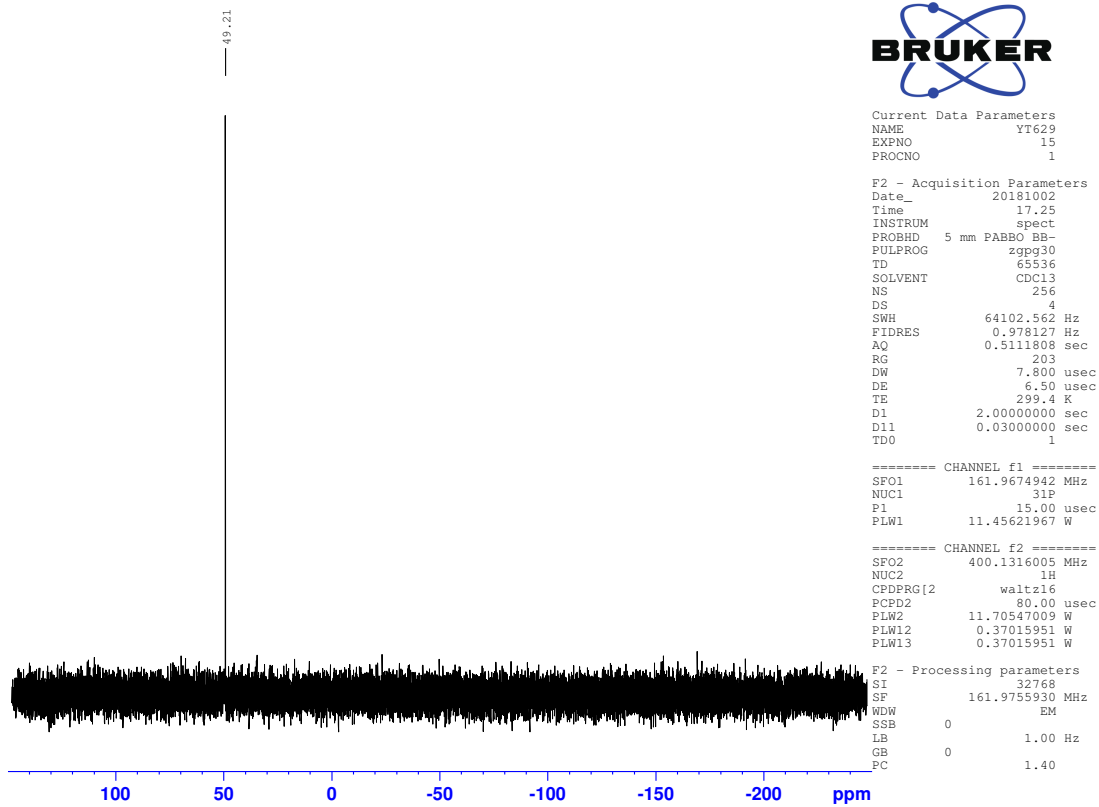

**Figure S5b.** A  $^{31}\text{P} \{^1\text{H}\}$  NMR spectrum of  $3^{\text{Cl}}$  (162 MHz,  $\text{CDCl}_3$ , r.t.).

## Generic Display Report

### Analysis Info

Analysis Name D:\Data\akita\17kawano\oyama\Ru2CIAN000003.d  
Method esi\_posi\_high.m  
Sample Name Ru2CIAN  
Comment

Acquisition Date 2018/11/26 12:18:28

Operator BDAL@DE  
Instrument micrOTOF

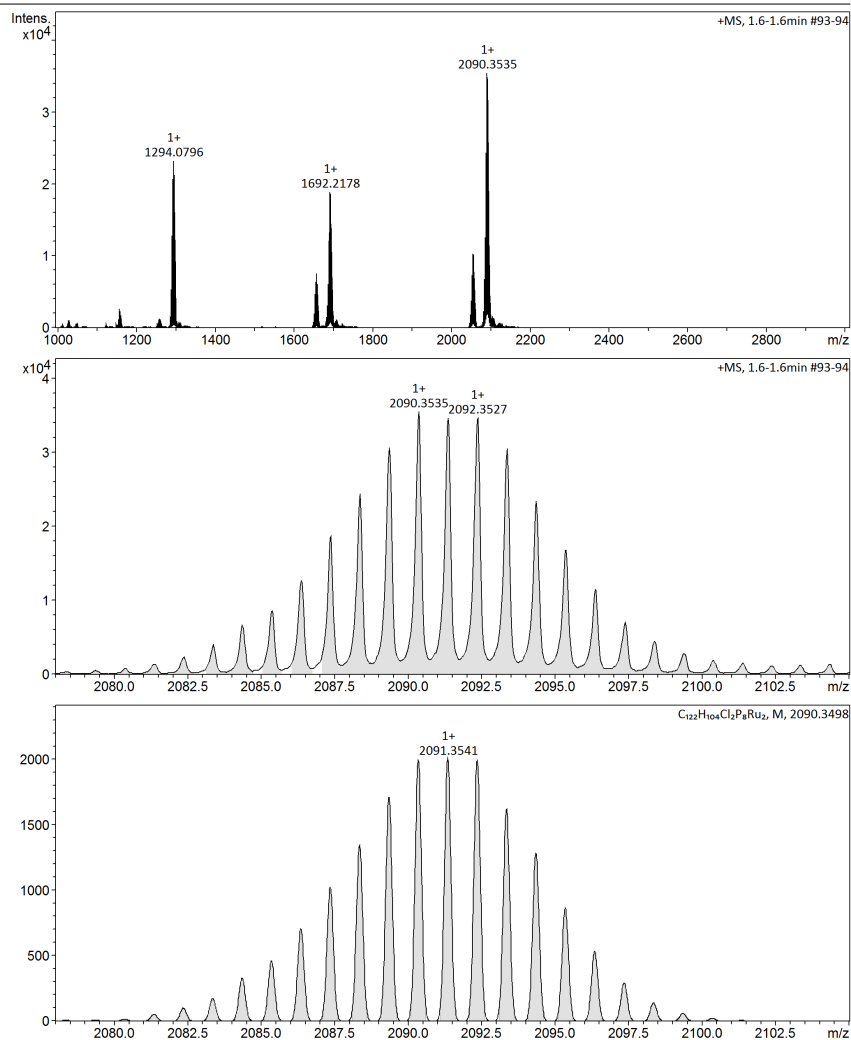

Bruker Compass DataAnalysis 4.2

printed: 2018/11/26 12:45:20

by: BDAL@DE

Page 1 of 1

Figure S5c. ESI-TOF-MS spectra of **3**<sup>Cl</sup>.

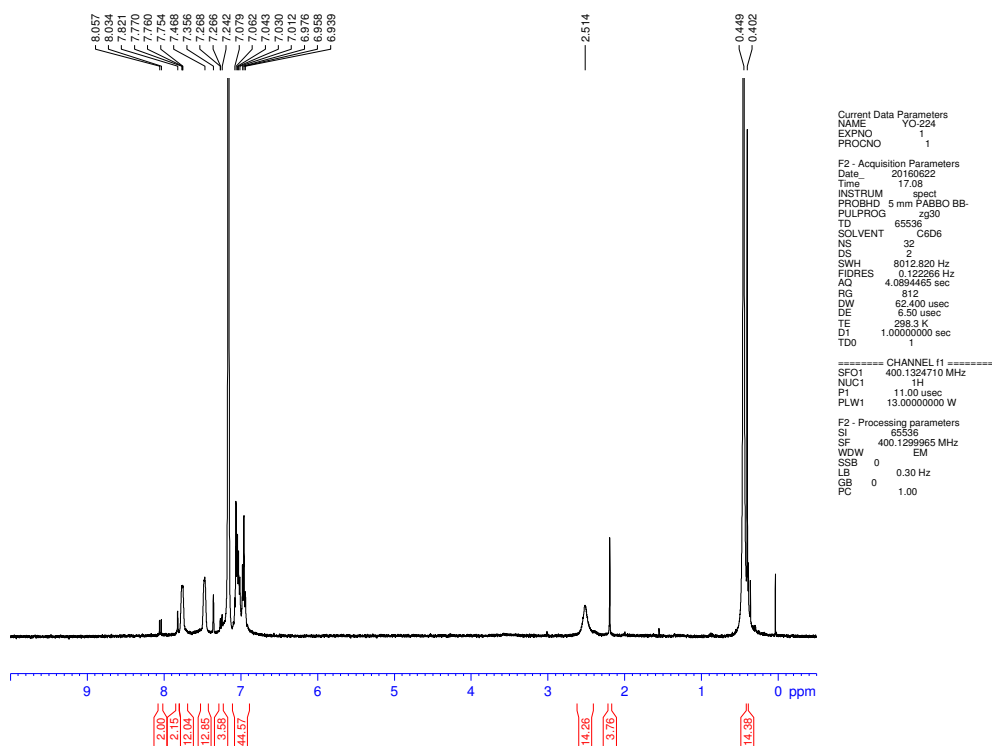

Figure S6a. A  $^1\text{H}$  NMR spectrum of  $1^{\text{C4TMS}}$  (400 MHz,  $\text{C}_6\text{D}_6$ , r.t.).

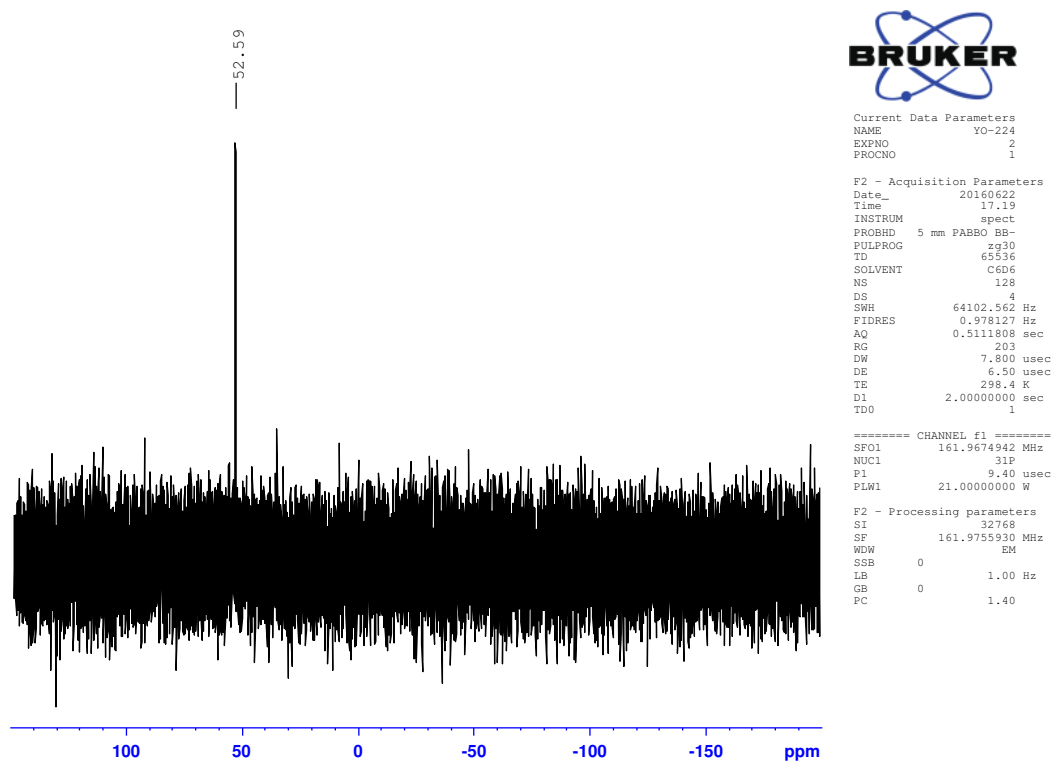

Figure S6b. A  $^{31}\text{P}$  NMR spectrum of  $1^{\text{C4TMS}}$  (162 MHz,  $\text{C}_6\text{D}_6$ , r.t.).

# Display Report

## Analysis Info

Analysis Name D:\Data\akita\15Oyama\Ru2C4TMSAA-hiMS\Acq000001.d  
Method esi\_posi\_high.m  
Sample Name Ru2C4TMSAA  
Comment

Acquisition Date 2017/03/15 21:24:36  
Operator BDAL@DE  
Instrument micrOTOF 213750.10321

## Acquisition Parameter

|             |            |                      |          |                  |           |
|-------------|------------|----------------------|----------|------------------|-----------|
| Source Type | ESI        | Ion Polarity         | Positive | Set Nebulizer    | 0.2 Bar   |
| Focus       | Not active |                      |          | Set Dry Heater   | 160 °C    |
| Scan Begin  | 50 m/z     | Set Capillary        | 4500 V   | Set Dry Gas      | 5.0 l/min |
| Scan End    | 4500 m/z   | Set End Plate Offset | -500 V   | Set Divert Valve | Waste     |

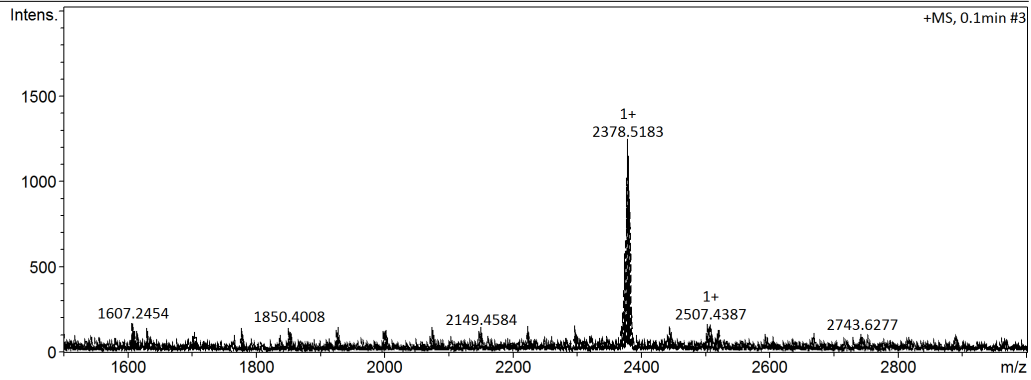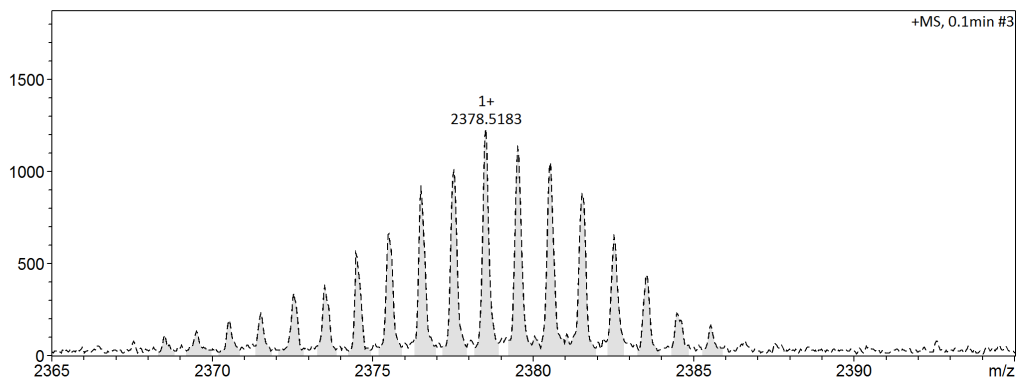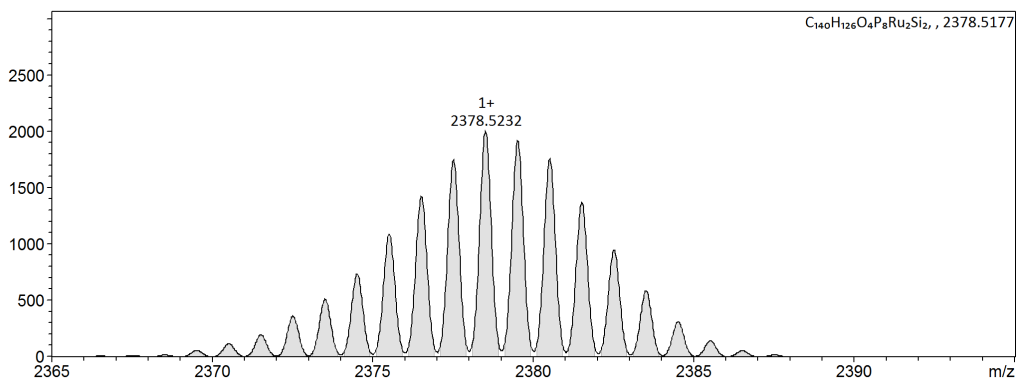

Figure S6c. ESI-TOF MS spectra of  $1^{C4TMS}$ .

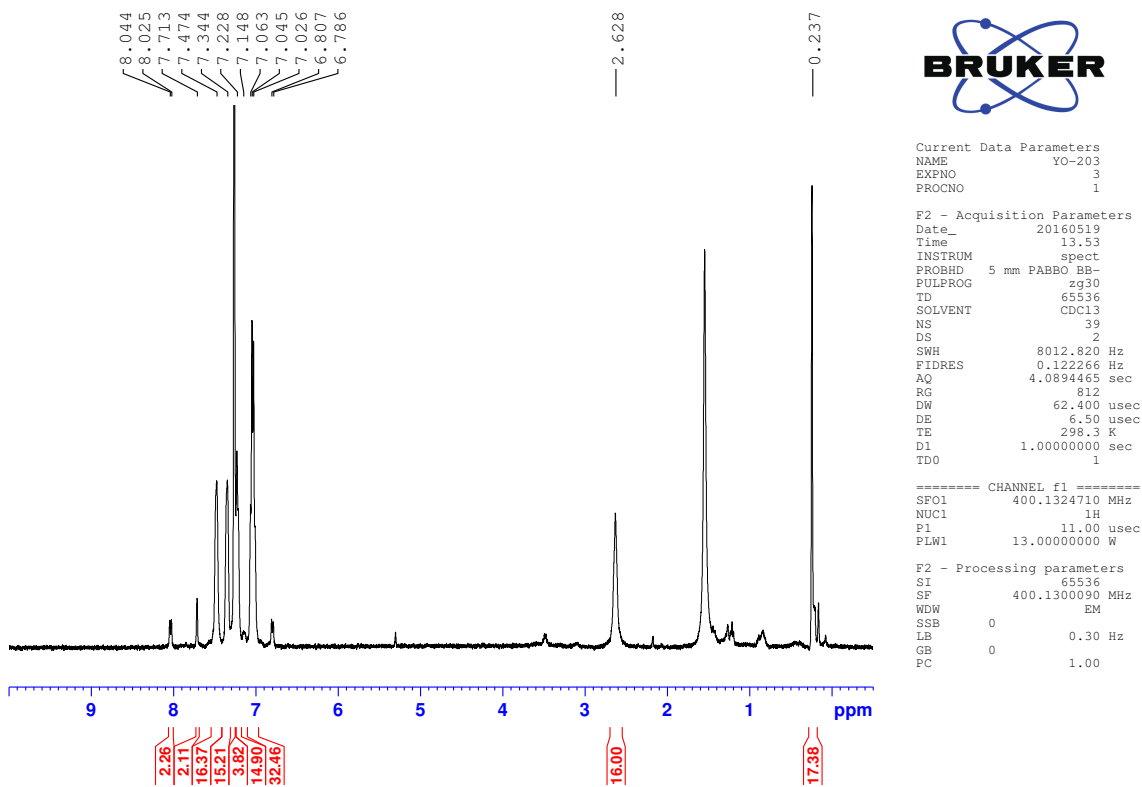

Figure S7a. A  $^1\text{H}$  NMR spectrum of  $2^{\text{C4TMS}}$  (400 MHz,  $\text{CDCl}_3$ , r.t.).

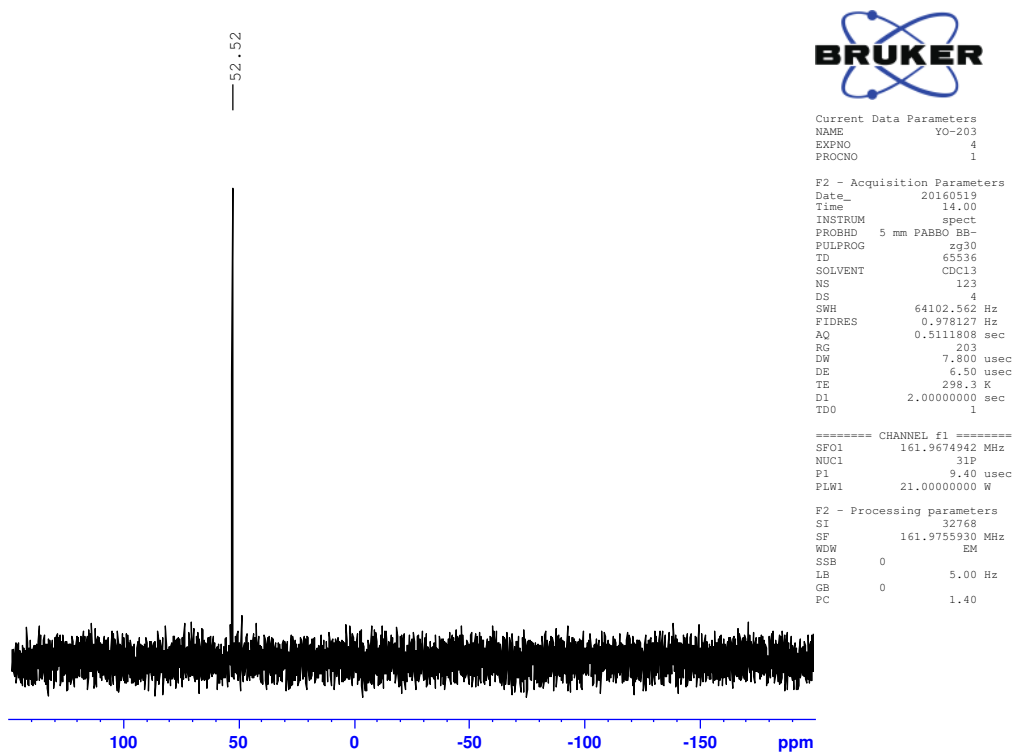

Figure S7b. A  $^{31}\text{P}$   $\{^1\text{H}\}$  NMR spectrum of  $2^{\text{C4TMS}}$  (162 MHz,  $\text{CDCl}_3$ , r.t.)

## Display Report

### Analysis Info

Analysis Name D:\Data\akita\15Oyama\Ru2C4TMSAQ-hims\Acq000003.d  
Method esi\_posi\_high.m  
Sample Name Ru2C4TMSAQ  
Comment

Acquisition Date 2017/03/16 19:03:28

Operator BDAL@DE

Instrument micrOTOF 213750.10321

### Acquisition Parameter

|             |            |                      |          |                  |           |
|-------------|------------|----------------------|----------|------------------|-----------|
| Source Type | ESI        | Ion Polarity         | Positive | Set Nebulizer    | 0.2 Bar   |
| Focus       | Not active |                      |          | Set Dry Heater   | 160 °C    |
| Scan Begin  | 50 m/z     | Set Capillary        | 4500 V   | Set Dry Gas      | 6.0 l/min |
| Scan End    | 4500 m/z   | Set End Plate Offset | -500 V   | Set Divert Valve | Waste     |

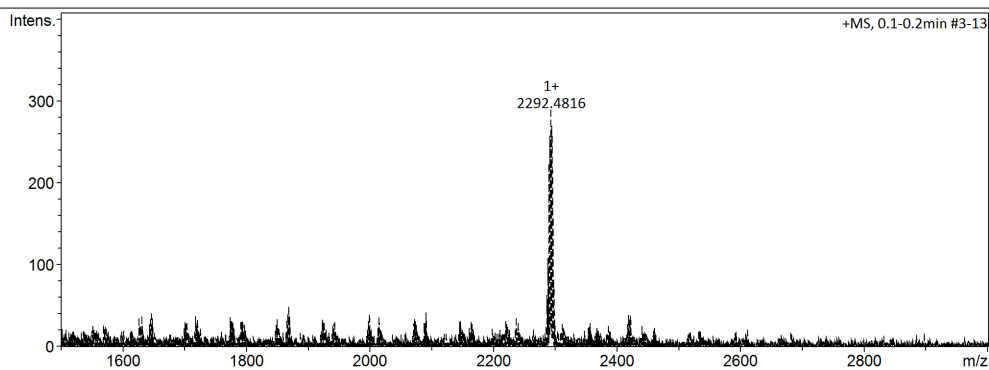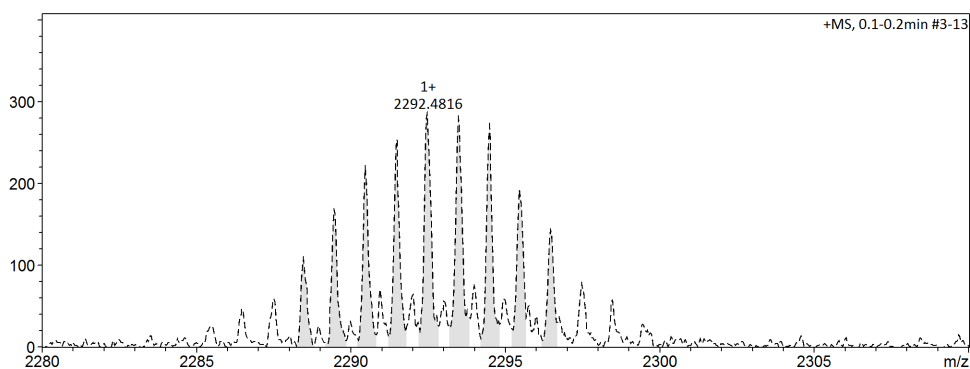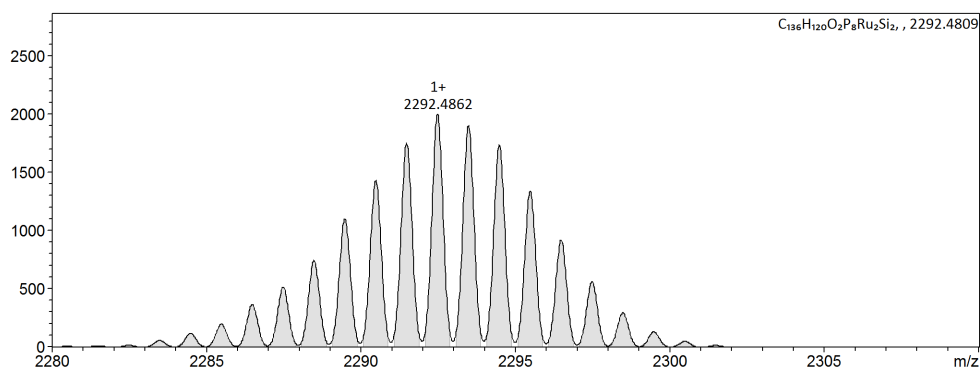

Figure S7c. ESI-TOF MS spectra of  $2^{C4TMS}$ .

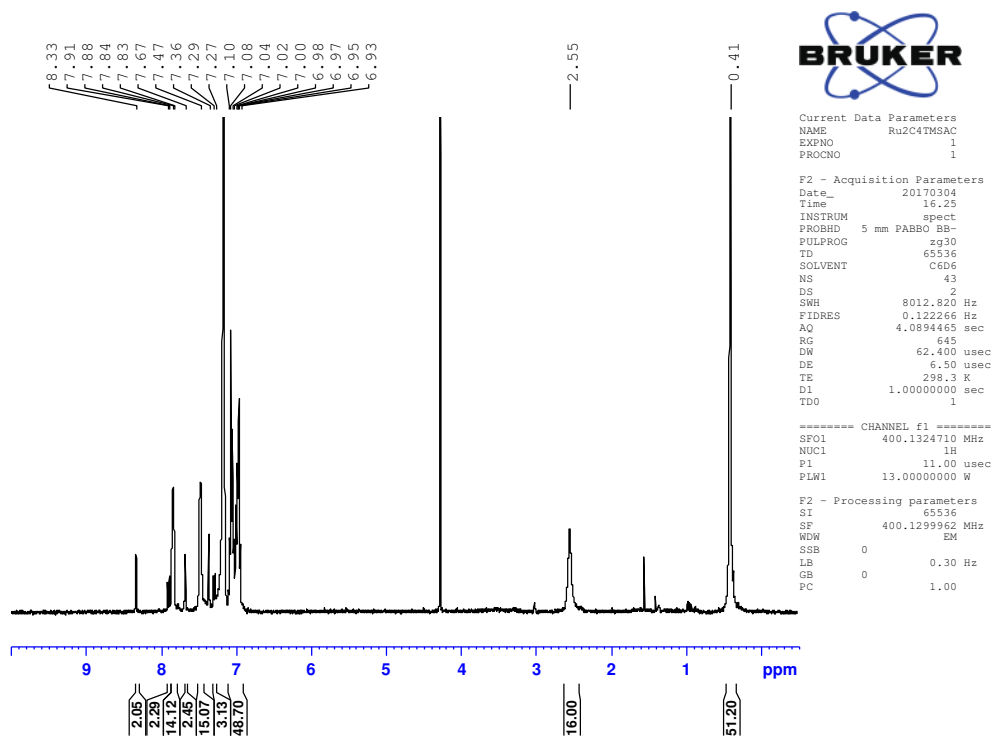

Figure S8a. A  $^1\text{H}$  NMR spectrum of  $3^{\text{C}}\text{4TMS}$  (400 MHz,  $\text{CDCl}_3$ , r.t.).

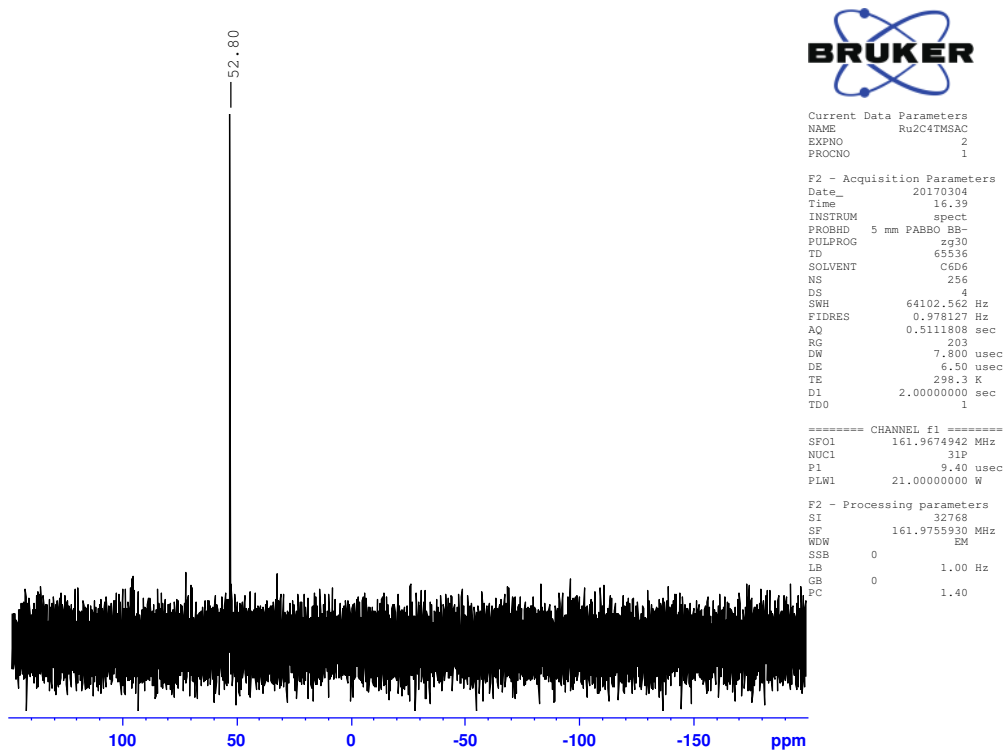

Figure S8b. A  $^{31}\text{P}$  NMR spectrum of  $3^{\text{C}}\text{4TMS}$  (162 MHz,  $\text{CDCl}_3$ , r.t.).

## Display Report

**Analysis Info**  
Analysis Name D:\Data\akita\15Oyama\Ru2C4TMSAC\Acq000001.d Acquisition Date 2017/03/06 13:29:28  
Method esi\_posi\_high.m Operator BDAL@DE  
Sample Name Ru2C4TMSAC-1 Instrument micrOTOF 213750.10321  
Comment

**Acquisition Parameter**

|             |            |                      |          |                  |           |
|-------------|------------|----------------------|----------|------------------|-----------|
| Source Type | ESI        | Ion Polarity         | Positive | Set Nebulizer    | 0.3 Bar   |
| Focus       | Not active |                      |          | Set Dry Heater   | 180 °C    |
| Scan Begin  | 50 m/z     | Set Capillary        | 4500 V   | Set Dry Gas      | 4.0 l/min |
| Scan End    | 3000 m/z   | Set End Plate Offset | -500 V   | Set Divert Valve | Waste     |

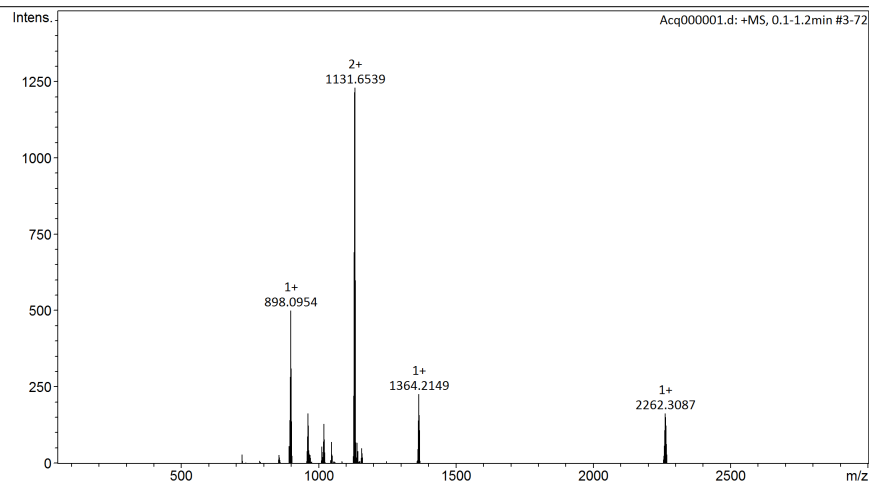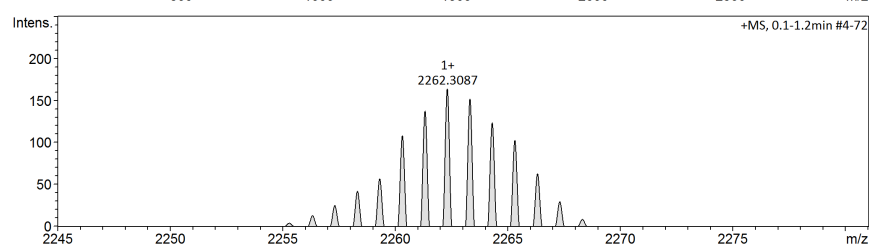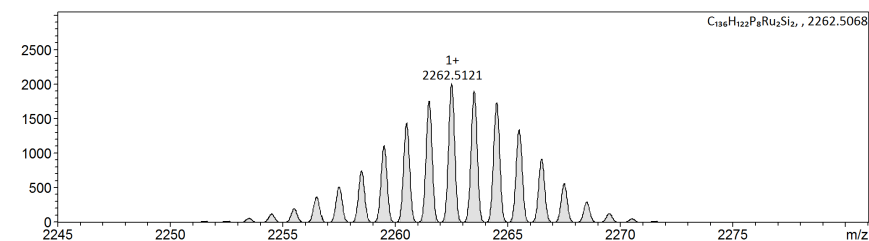

**Figure S8c.** ESI-TOF MS spectra of **3<sup>C4</sup>TMS**.



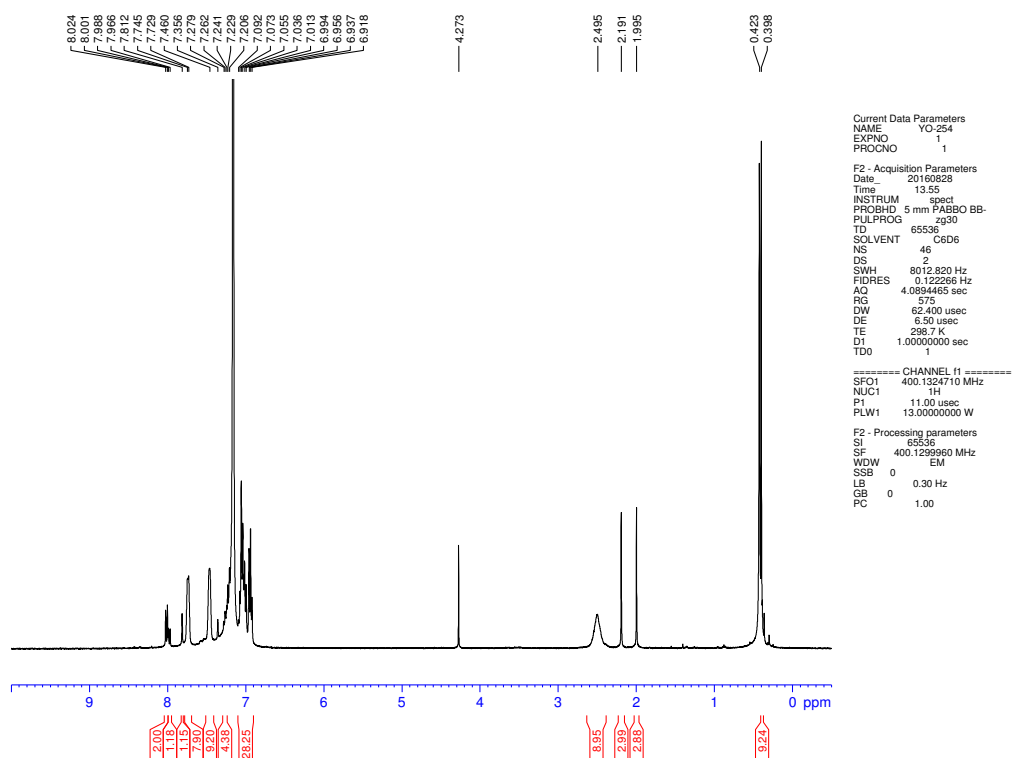

Figure S9a. A  $^1\text{H}$  NMR spectrum of **4** (400 MHz,  $\text{C}_6\text{D}_6$ , r.t.).

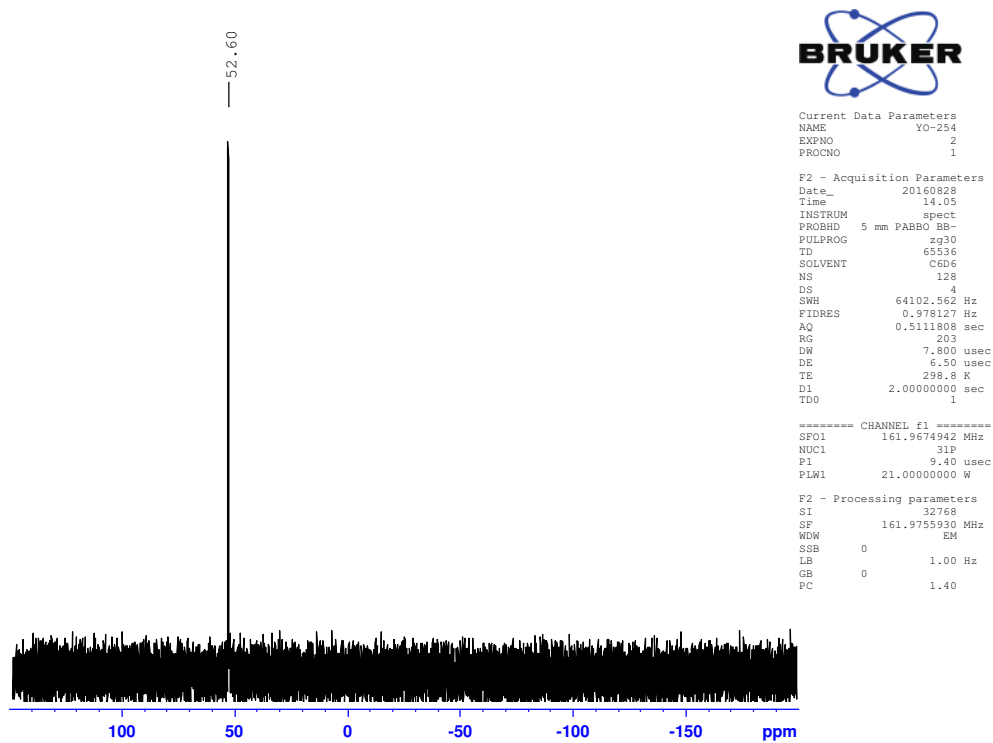

Figure S9b. A  $^{31}\text{P}$  NMR spectrum of **4** (162 MHz,  $\text{C}_6\text{D}_6$ , r.t.).

## Display Report

### Analysis Info

Analysis Name D:\Data\akita\15Oyama\RuC4TMSAA-hims\RuC4TMSAA\_2.d Acquisition Date 2017/03/17 15:57:02  
Method esi\_posi\_wide.m Operator BDAL@DE  
Sample Name RuC4TMSAA\_2 Instrument micrOTOF 213750.10321  
Comment

### Acquisition Parameter

|             |            |                      |          |                  |            |
|-------------|------------|----------------------|----------|------------------|------------|
| Source Type | ESI        | Ion Polarity         | Positive | Set Nebulizer    | 0.2 Bar    |
| Focus       | Not active |                      |          | Set Dry Heater   | 170 °C     |
| Scan Begin  | 50 m/z     | Set Capillary        | 4500 V   | Set Dry Gas      | 10.0 l/min |
| Scan End    | 4500 m/z   | Set End Plate Offset | -500 V   | Set Divert Valve | Waste      |

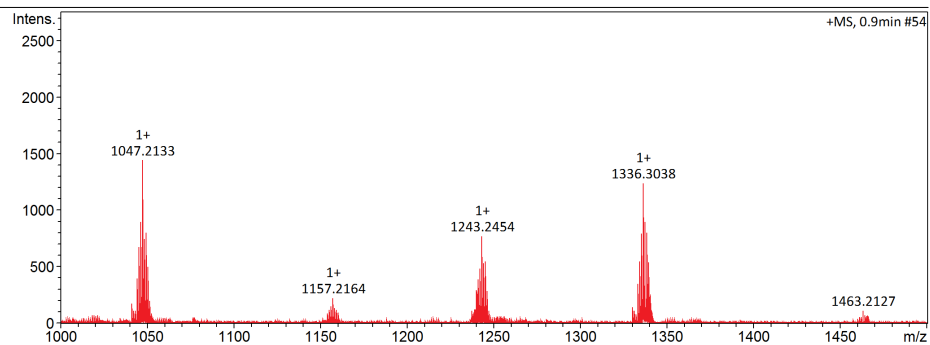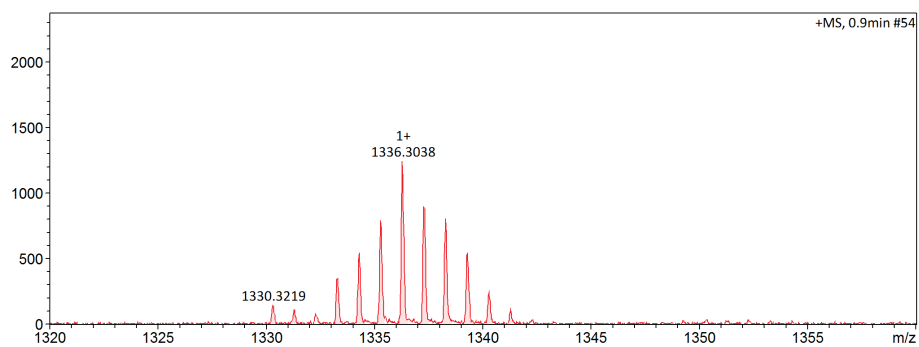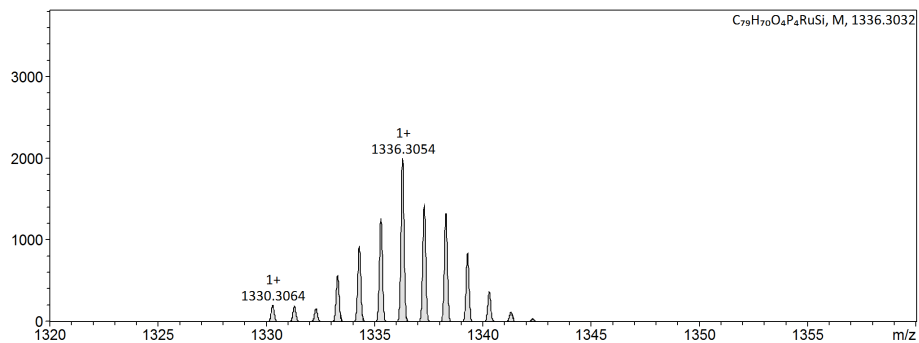

Figure S9c. ESI-TOF MS spectra of 4.

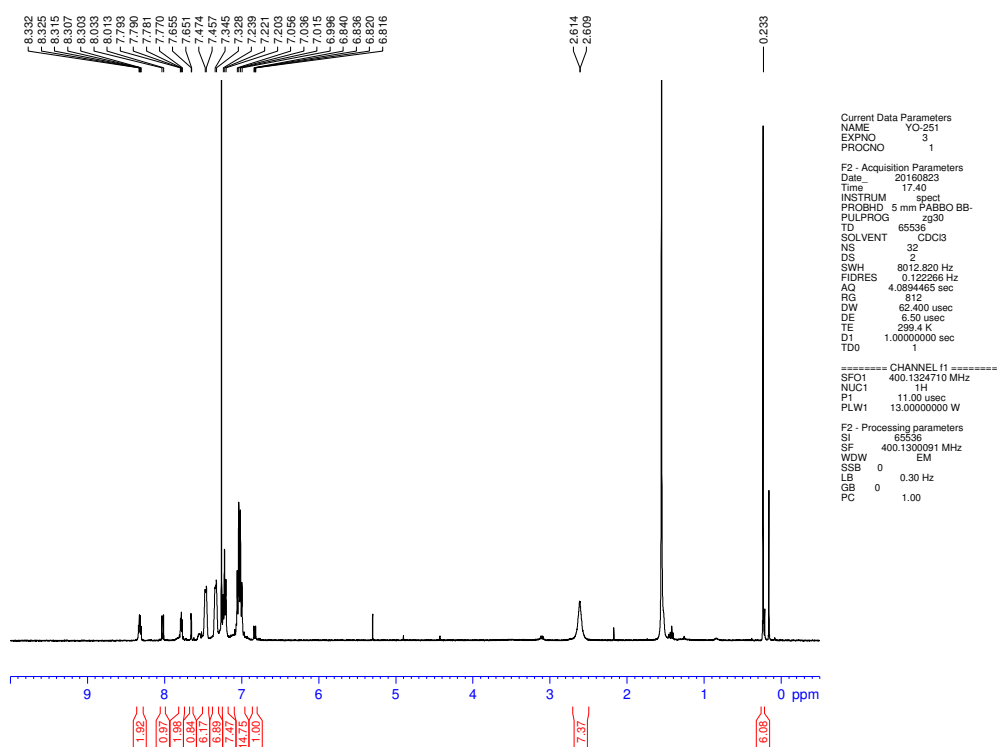

Figure S10a.  $^1\text{H}$  NMR spectrum of **5** (400 MHz,  $\text{CDCl}_3$ , r.t.)

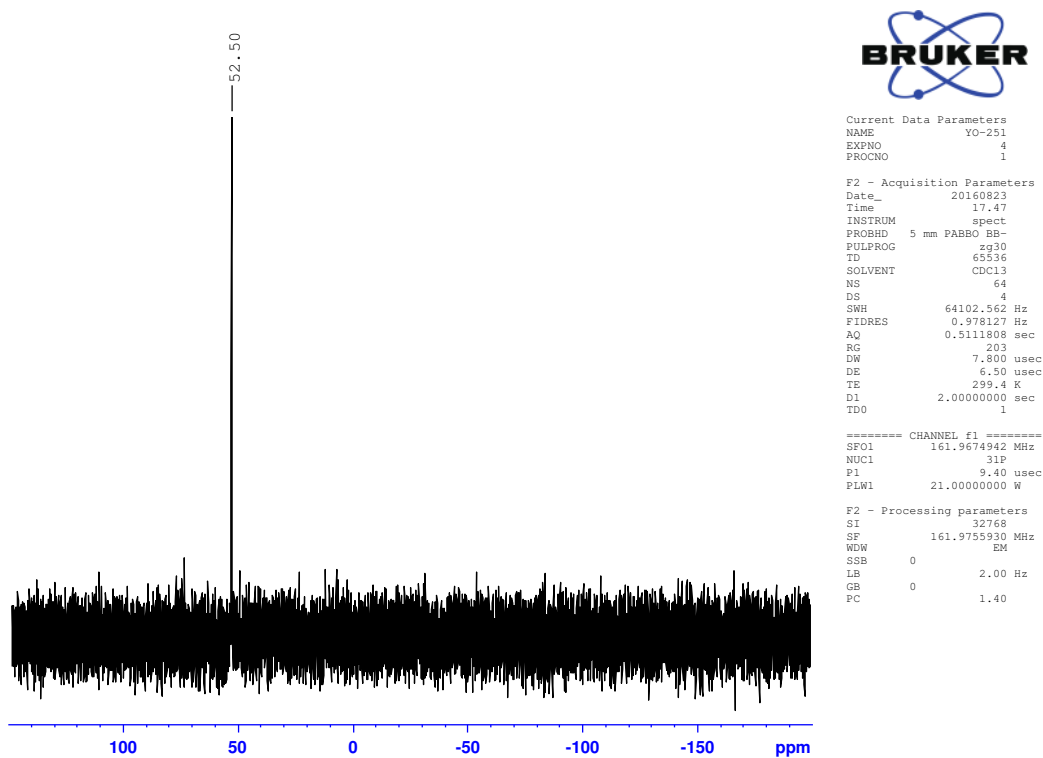

Figure S10b. A  $^{31}\text{P}$  NMR spectrum of **5** (162 MHz,  $\text{CDCl}_3$ , r.t.).

# Display Report

## Analysis Info

Analysis Name D:\Data\akita\15Oyama\RuC4TMSAQ-Hlms\Acq000001.d  
Method esi\_posi\_wide.m  
Sample Name Ru2CIAQ  
Comment

Acquisition Date 2017/03/07 21:57:08  
Operator BDAL@DE  
Instrument micrOTOF 213750.10321

## Acquisition Parameter

|             |            |                      |          |                  |           |
|-------------|------------|----------------------|----------|------------------|-----------|
| Source Type | ESI        | Ion Polarity         | Positive | Set Nebulizer    | 0.3 Bar   |
| Focus       | Not active |                      |          | Set Dry Heater   | 180 °C    |
| Scan Begin  | 50 m/z     | Set Capillary        | 4500 V   | Set Dry Gas      | 4.0 l/min |
| Scan End    | 3000 m/z   | Set End Plate Offset | -500 V   | Set Divert Valve | Waste     |

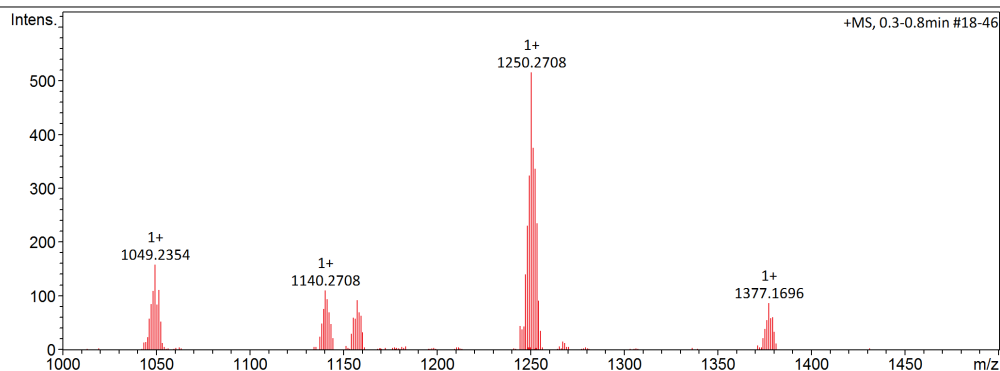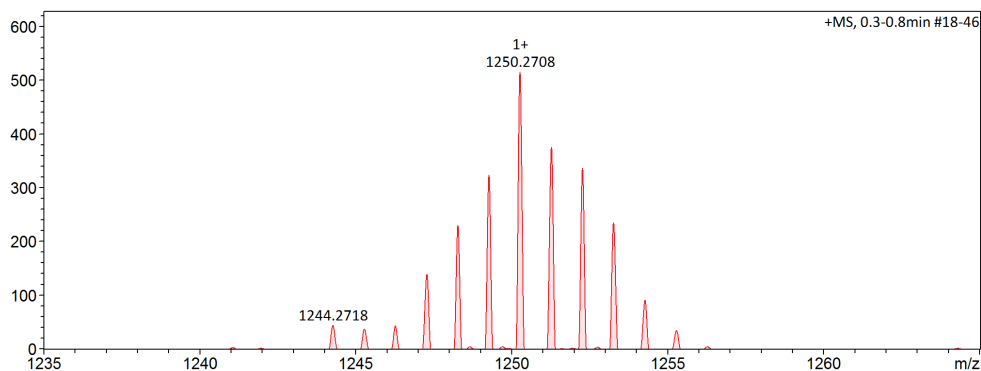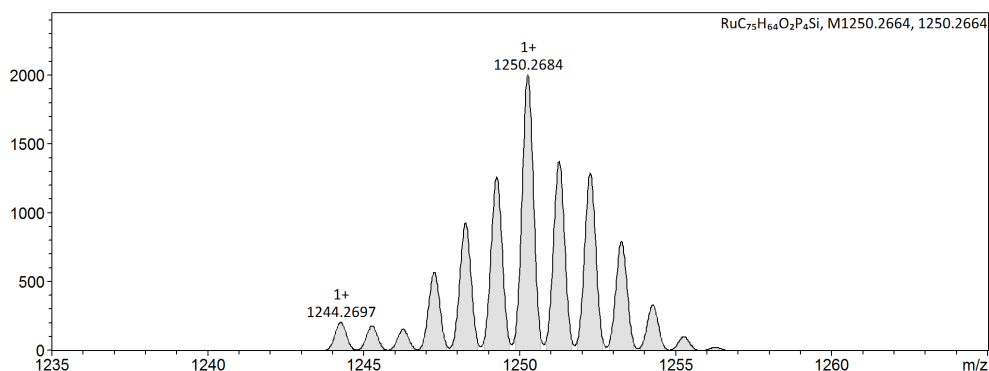

Figure S10c. ESI-TOF MS spectra of 5.

## II. Single-crystal X-ray crystallography

**3<sup>C4</sup>**: Single crystals of **3<sup>C4</sup>** were obtained by slow diffusion of hexane into a dichloromethane solution of **3<sup>C4</sup>**. A suitable crystal was selected and data was collected on a Bruker model APEX2 platform-CCD X-ray diffractometer system. The crystal was kept at 90(2) K during data collection. Using Olex2 [1], the structure was solved with the ShelXT [2] structure solution program and refined with the ShelXL [3] refinement package using Least Squares minimisation. All non-hydrogen atoms were refined with anisotropic displacement parameters. Hydrogen atoms were placed at calculated positions and refined by applying riding models. The TMS group was solved as an orientational disorder model. As a satisfactory disorder model for the solvent was not found, the OLEX2 Solvent Mask routine (the PLATON/SQUEEZE analogue) was used to mask out the disordered density of a half of hexane molecule.

**Crystal Data** for C<sub>136</sub>H<sub>122</sub>P<sub>8</sub>Ru<sub>2</sub>Si<sub>2</sub> (*M* = 2262.41 g/mol): monoclinic, space group P2<sub>1</sub>/c (no. 14), *a* = 28.758(5) Å, *b* = 12.1471(19) Å, *c* = 18.658(3) Å, *β* = 96.383(2)°, *V* = 6477.5(18) Å<sup>3</sup>, *Z* = 2, *T* = 87(2) K, *μ*(MoK $\alpha$ ) = 0.396 mm<sup>-1</sup>, *D*<sub>calc</sub> = 1.160 g/cm<sup>3</sup>, 30233 reflections measured (2.85° ≤ 2 $\Theta$  ≤ 50.054°), 11447 unique (*R*<sub>int</sub> = 0.0659, *R*<sub>sigma</sub> = 0.0908) which were used in all calculations. The final *R*<sub>1</sub> was 0.0454 (*I* > 2 $\sigma$ (*I*)) and *wR*<sub>2</sub> was 0.1189 (all data).

1. O. V. Dolomanov, L. J. Bourhis, R. J. Gildea, J. A. K. Howard, H. Puschmann. (2009), *J. Appl. Cryst.* 42, 339-341.
2. G. M. Sheldrick, (2015) *Acta Cryst.* A71, 3-8.
3. G. M. Sheldrick, (2015). *Acta Cryst.* C71, 3-8.

### III. Electrochemical, spectroscopic and theoretical data

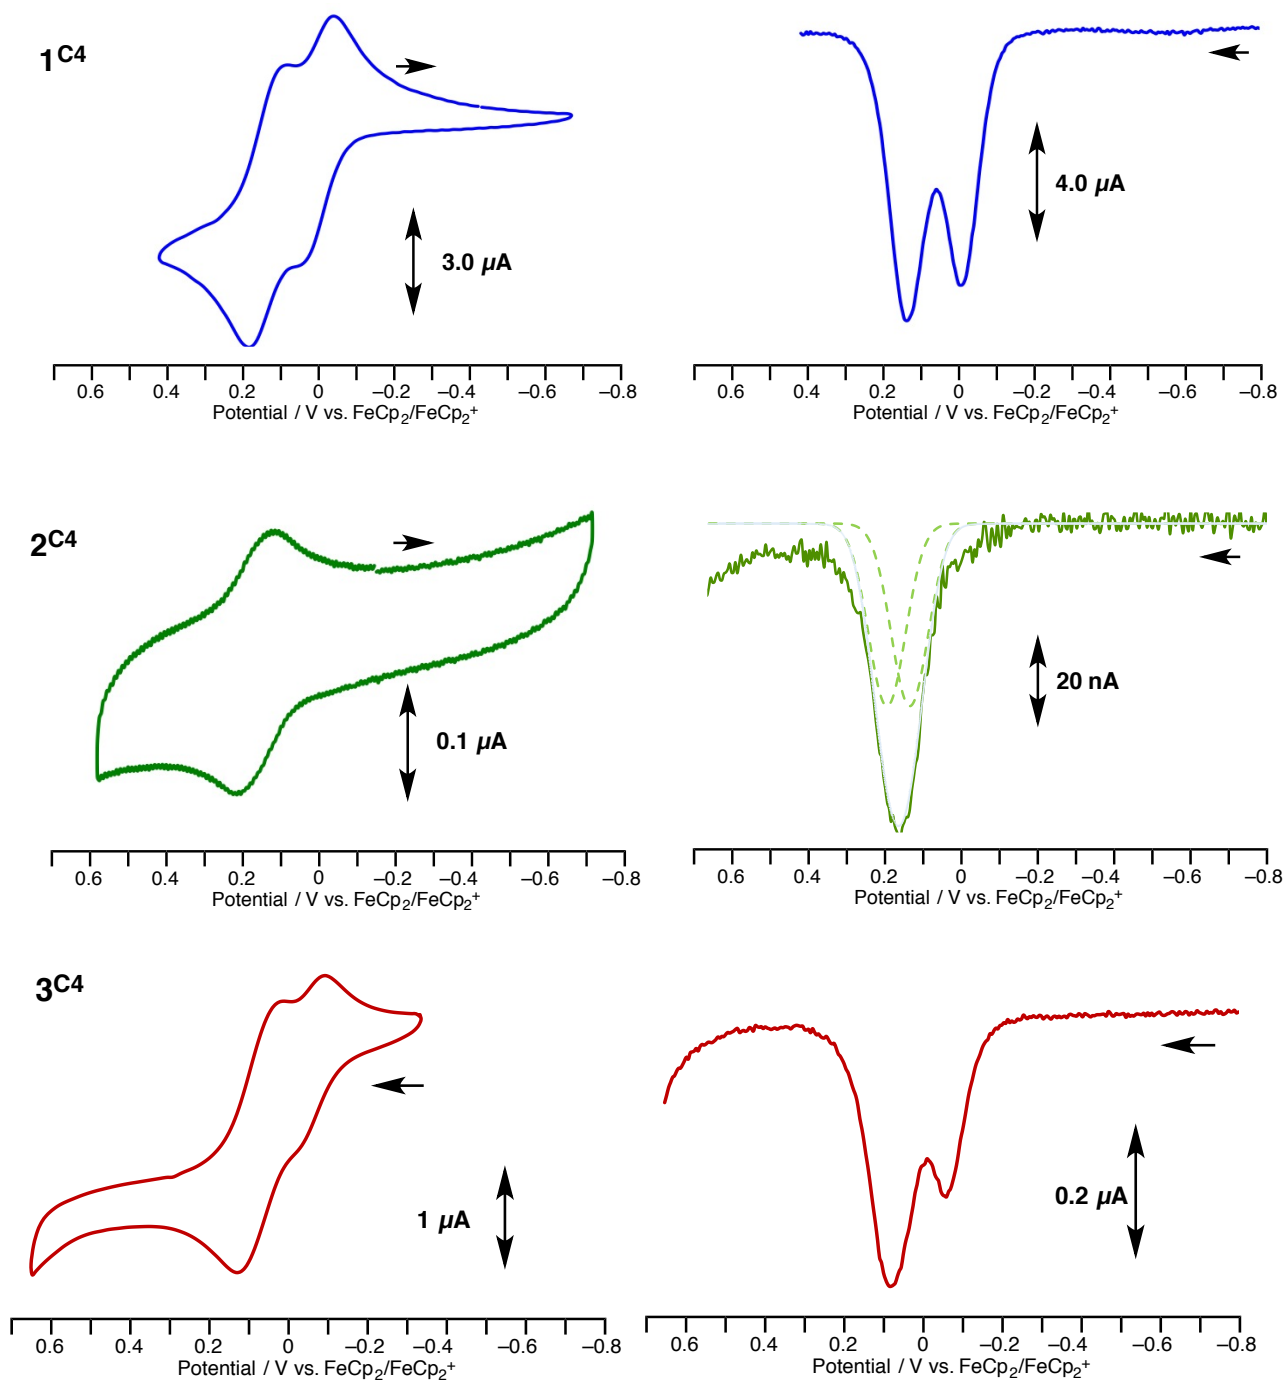

Figure S11a. CV and DPV charts for  $1^{C4}$ - $3^{C4}$ .

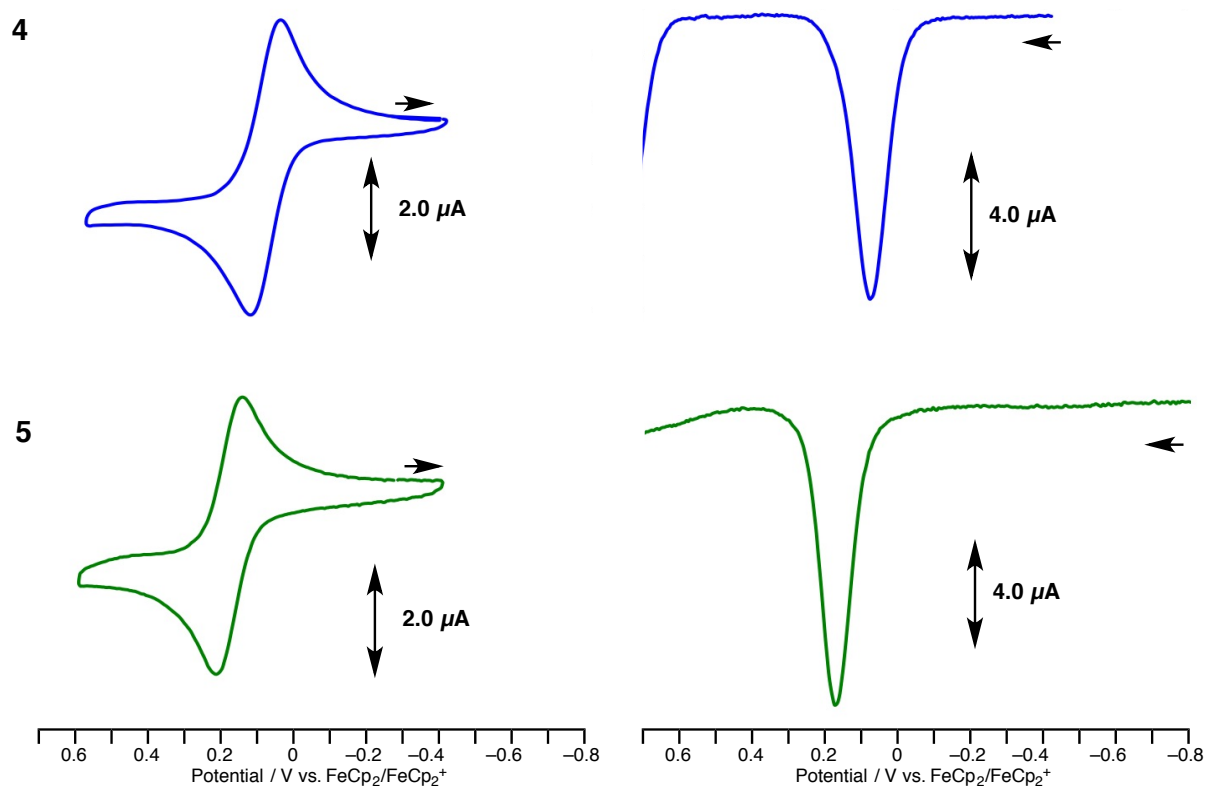

Figure S11b. CV and DPV charts for 4 and 5.

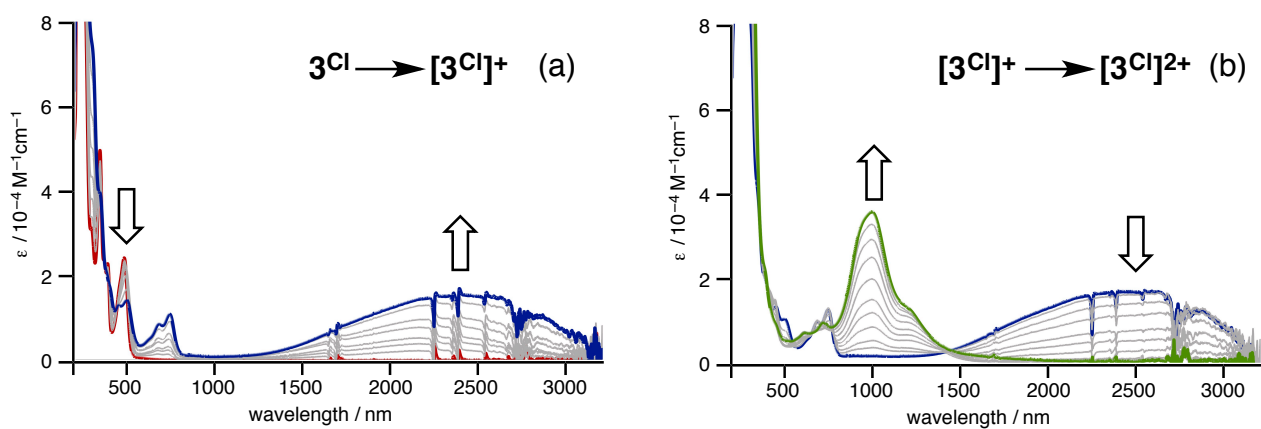

Figure S12. UV-Vis-NIR spectral changes of  $3^{\text{Cl}}$  upon addition of magic blue as observed in  $\text{CH}_2\text{Cl}_2$ . Spectral changes for (a)  $3^{\text{Cl}}$  to  $[3^{\text{Cl}}]^+$  and (b)  $[3^{\text{Cl}}]^+$  to  $[3^{\text{Cl}}]^{2+}$ .

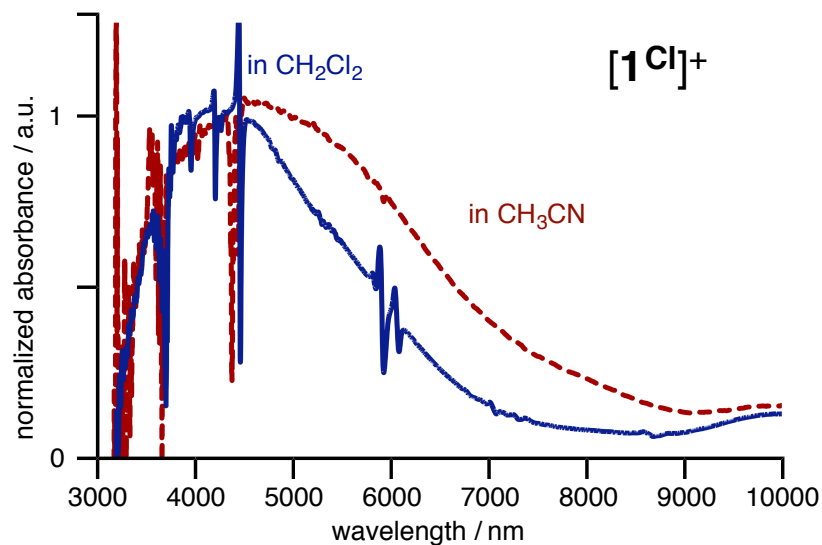

**Figure S13.** Normalized NIR spectra of  $[1^{Cl}]^+$  (blue solid; in  $CH_2Cl_2$ , red dashed; in  $CH_3CN$ ).

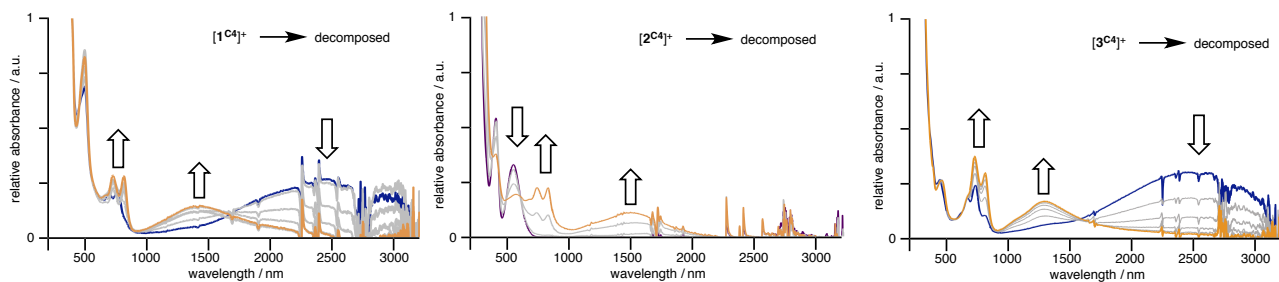

**Figure S14.** UV-Vis-NIR spectral changes of  $[1^{C4}]^+$  -  $[3^{C4}]^+$  observed in  $CH_2Cl_2$ . The spectral changes were completed within 10 min at room temperature.

**Table S1.** UV-Vis-NIR spectral data of  $[3^R]^{n+}$  ( $R = Cl, C_4, n = 0-2$ ) observed in  $CH_2Cl_2$ .

| complex  | $\lambda / nm (\epsilon \times 10^3 / M^{-1}cm^{-1})$ |                                                               |                         |
|----------|-------------------------------------------------------|---------------------------------------------------------------|-------------------------|
|          | $n = 0$                                               | $n = 1$                                                       | $n = 2$                 |
| $3^{Cl}$ | 257 (90.0) 347<br>(49.5) 484 (24.1)                   | 262 (101) 452<br>(13.0) 497 (14.1)<br>683 (8.6) 742<br>(10.8) | 298 (176) 992<br>(35.7) |
| $3^{C4}$ | 245 (96.3) 310<br>(46.8) 349 (35.8)<br>473 (19.8)     | —                                                             | —                       |



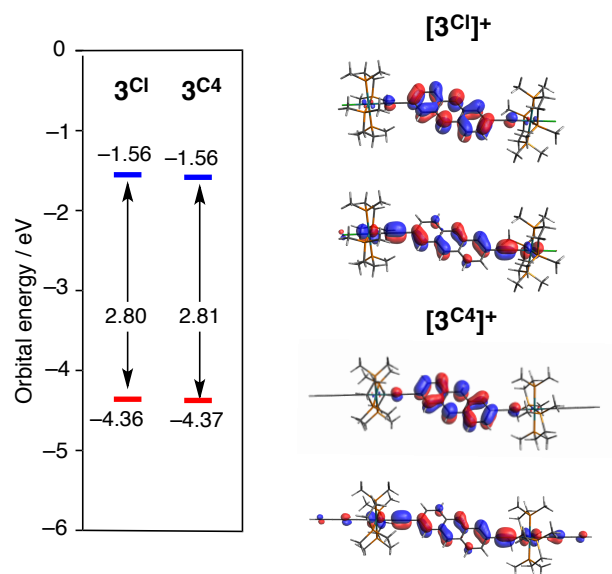

**Figure S15.** (left) HOMO and LUMO Energy levels of Kohn-Sham frontier orbitals of **3'** obtained at the B3LYP/LanL2DZ(Ru), 6-31G(d) levels of theory combined with the CPCM continuum solvent method (CH<sub>2</sub>Cl<sub>2</sub>). (right) Orbital distributions of LUMOs and HOMOs.

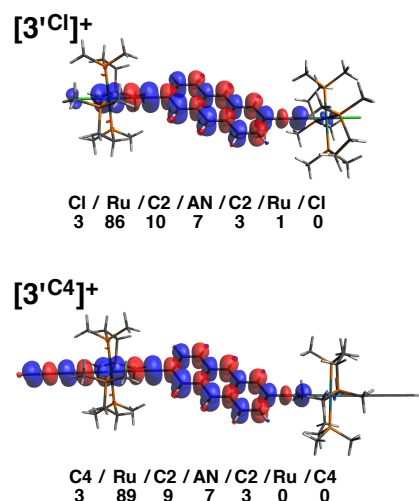

**Figure S16.** (a) Spin density distributions of the models of  $[3^R]^+$  ( $R = \text{Cl}, \text{C}_4$ ) at the BLYP35/Def2SVP levels of theory combined with the CPCM continuum solvent methods ( $\text{CH}_2\text{Cl}_2$ ).

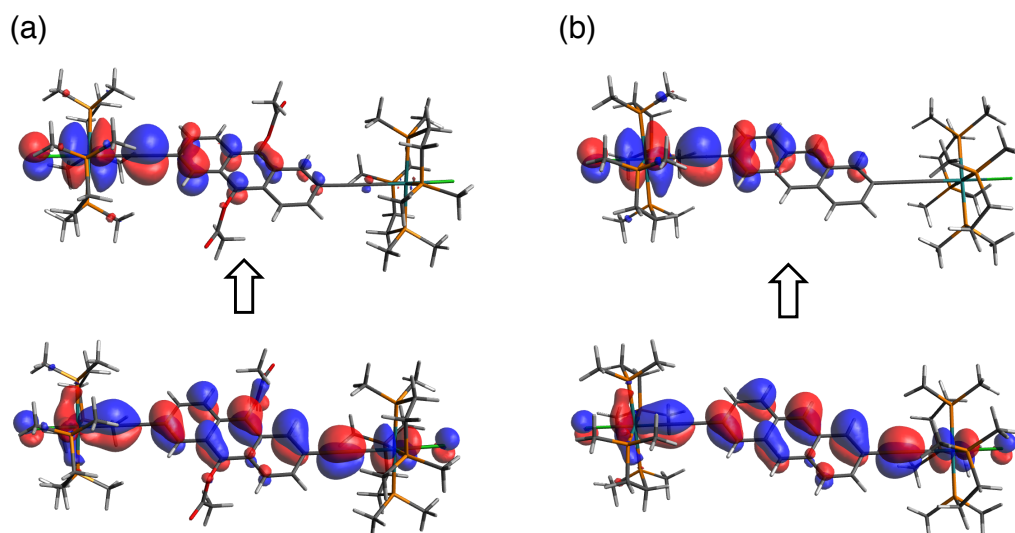

**Figure S17.** Natural transition orbitals (NTO) of the lowest-energy transitions for (a)  $[1^{\text{Cl}}]^+$  and (b)  $[3^{\text{Cl}}]^+$  obtained by the TDDFT at the BLYP35/Def2SVP levels of theory with CPCM ( $\text{CH}_2\text{Cl}_2$ ).

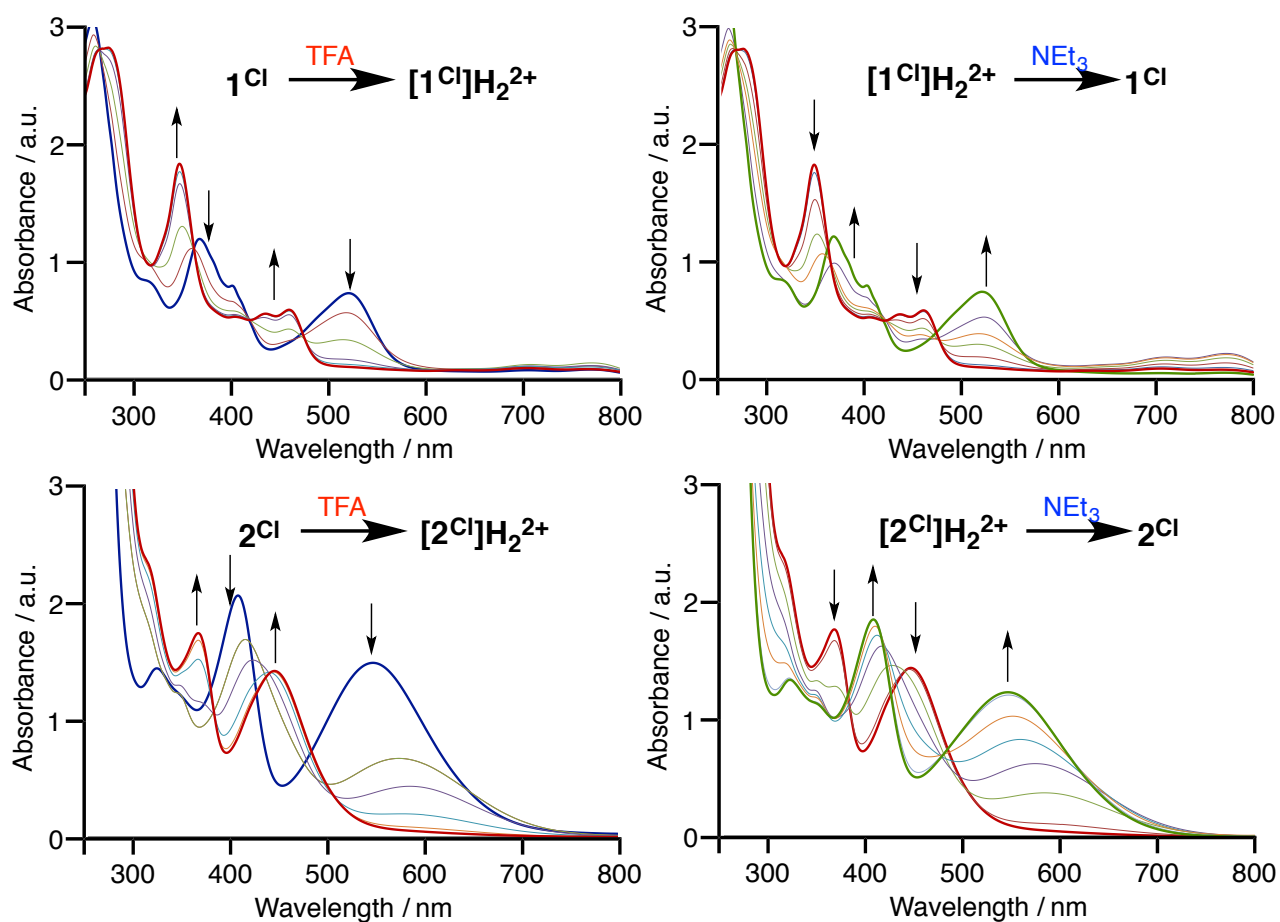

**Figure S18.** Protonation and deprotonation reactions with TFA and  $\text{NEt}_3$  of  $1\text{Cl}$  and  $2\text{Cl}$  recorded in  $\text{CH}_2\text{Cl}_2$ .

**Table S2.** Cartesian coordinates of optimized geometry of **1<sup>Cl</sup>**.

|    |             |             |             |   |              |             |             |
|----|-------------|-------------|-------------|---|--------------|-------------|-------------|
| C  | -2.82857800 | -0.36093400 | -0.17013800 | H | 6.65344600   | 3.66530700  | -2.12239100 |
| C  | -3.71473300 | 0.62227100  | 0.25840800  | H | 5.82578800   | 2.15296900  | -1.63455200 |
| C  | -3.15575300 | 1.84069700  | 0.79294200  | H | 9.14397700   | 3.91055400  | -0.06669200 |
| C  | -1.80635300 | 2.04541000  | 0.86562800  | H | 10.41866900  | 2.96985600  | -0.86760100 |
| C  | -1.41870400 | -0.19052400 | -0.09723400 | H | 9.38279600   | 4.07768800  | -1.82142300 |
| C  | -0.88161100 | 1.04906000  | 0.41628800  | H | 10.14955200  | -1.94770100 | -3.75232700 |
| H  | -3.83921100 | 2.60819400  | 1.14412600  | H | 10.90382900  | -0.81706000 | -2.58484700 |
| H  | -3.22421600 | -1.28133400 | -0.58468600 | H | 10.53344400  | -2.47298400 | -2.09182800 |
| H  | -1.41910000 | 2.96990900  | 1.28073700  | H | 7.83876700   | -3.44167600 | -2.10247400 |
| C  | -0.50825900 | -1.18348800 | -0.50681400 | H | 6.44296500   | -2.35035200 | -2.24963800 |
| C  | 0.88040700  | -1.00785700 | -0.46551700 | H | 7.47831100   | -2.68460600 | -3.66967400 |
| C  | 1.41759100  | 0.23178200  | 0.04783900  | H | 6.23163600   | -3.03734900 | 0.83973900  |
| C  | 0.50709000  | 1.22514800  | 0.45644400  | H | 7.53213500   | -3.99444500 | 0.10127500  |
| C  | 1.80503500  | -2.00586700 | -0.91127800 | H | 7.21937300   | -4.14082500 | 1.84532800  |
| C  | 3.15443600  | -1.80339600 | -0.83364600 | H | 9.95136100   | -3.74557800 | 2.22244700  |
| C  | 3.71353500  | -0.58509400 | -0.29887000 | H | 10.29074700  | -3.37984600 | 0.51060700  |
| C  | 2.82755700  | 0.40083400  | 0.12368300  | H | 10.79950900  | -2.23494200 | 1.75836200  |
| H  | 1.41778800  | -2.93045000 | -1.32620000 | H | 10.20062200  | 2.25365500  | 2.36983100  |
| H  | 3.83784600  | -2.57372500 | -1.17864400 | H | 8.82483900   | 3.36006900  | 2.15847400  |
| H  | 3.22324600  | 1.32127200  | 0.53812600  | H | 9.11119200   | 2.61023700  | 3.74480700  |
| C  | 5.12289100  | -0.42290000 | -0.21328300 | H | 5.71212700   | 0.77622500  | 2.55328200  |
| C  | -5.12393200 | 0.45452300  | 0.18217000  | H | 6.44109500   | 1.89759400  | 3.74405600  |
| C  | 6.34706300  | -0.26947800 | -0.12475300 | H | 6.12127700   | 2.42632700  | 2.07238700  |
| C  | -6.34722500 | 0.28748800  | 0.10776100  | H | -10.32224900 | -1.42729300 | -2.87195200 |
| H  | 8.33495900  | -0.15727700 | -4.39695700 | H | -9.21898100  | -1.55660500 | -4.27764300 |
| H  | 6.92173500  | 0.20213800  | -3.39550800 | H | -9.06807700  | -2.68248300 | -2.90835200 |
| C  | 8.01815300  | 0.17002100  | -3.39931900 | H | -6.49679800  | -1.11107400 | -4.07475700 |
| H  | 8.20542600  | 2.32654000  | -3.71273400 | H | -5.71661700  | -0.38909900 | -2.63240000 |
| C  | 8.59499200  | 1.54516800  | -3.04928600 | H | -6.29015600  | -2.06169600 | -2.58149100 |
| H  | 9.68644600  | 1.53952900  | -3.15927000 | H | -8.73752900  | -3.89097300 | -0.93877300 |
| C  | 7.46719500  | -2.53309000 | -2.58476700 | H | -9.15869100  | -4.47681900 | 0.68630700  |
| C  | 10.18778700 | -1.63367500 | -2.70336100 | H | -10.18353900 | -3.25249000 | -0.12340300 |
| P  | 8.52091800  | -1.08971300 | -2.11508700 | H | -6.09407200  | -3.16707800 | -0.13892200 |
| C  | 6.61421700  | 2.86416000  | -1.37643900 | H | -5.79892100  | -2.33209000 | 1.38983100  |
| P  | 8.23316700  | 1.97748100  | -1.26496800 | H | -6.52797800  | -3.96737100 | 1.39325500  |
| C  | 9.40989300  | 3.37419900  | -0.98190000 | H | -7.35122400  | 1.59740700  | 4.22220900  |
| Ru | 8.32995300  | -0.04173800 | 0.02256900  | H | -6.29935000  | 1.48274200  | 2.77778800  |

|    |              |             |             |    |              |             |             |
|----|--------------|-------------|-------------|----|--------------|-------------|-------------|
| C  | 7.23301100   | -3.44583300 | 0.99862800  | H  | -7.55386400  | 2.73502100  | 2.87070400  |
| P  | 8.40639900   | -2.05354300 | 1.31571200  | H  | -10.91170500 | 0.45495300  | 2.66604400  |
| C  | 10.01825400  | -2.94494100 | 1.47758600  | H  | -10.09116800 | 1.17853500  | 4.08628700  |
| P  | 8.11346400   | 1.01724100  | 2.16106500  | H  | -10.33414100 | 2.12578900  | 2.59545300  |
| C  | 6.43554700   | 1.58269300  | 2.69489100  | H  | -10.82772000 | 2.43702000  | -1.43703800 |
| C  | 9.16637000   | 2.45110800  | 2.66219200  | H  | -10.53633700 | 3.24262500  | 0.10815500  |
| C  | 7.98371000   | -1.61943800 | 3.08585000  | H  | -10.06719600 | 4.05827500  | -1.40697800 |
| H  | 6.88886000   | -1.60584300 | 3.15503100  | H  | -6.43916200  | 3.25850000  | 0.12110700  |
| C  | 8.55724600   | -0.24937600 | 3.46056500  | H  | -7.42752200  | 4.50589500  | -0.69594200 |
| H  | 8.34234500   | -2.40498100 | 3.76170900  | H  | -7.87684500  | 3.92976300  | 0.92446500  |
| H  | 9.65245500   | -0.28980600 | 3.49973200  | O  | 1.01271600   | 2.40544900  | 1.01202700  |
| H  | 8.20403900   | 0.07842800  | 4.44577400  | O  | -1.01396800  | -2.36378200 | -1.06233700 |
| H  | -8.16521600  | 3.24203600  | -3.04317100 | C  | 1.32289900   | 3.50132800  | 0.23874600  |
| H  | -6.78644700  | 2.26469500  | -2.51932600 | C  | -1.32396700  | -3.45980000 | -0.28916500 |
| C  | -7.88204100  | 2.30101300  | -2.55624400 | C  | 1.07408000   | 3.40449900  | -1.24667600 |
| H  | -7.99083200  | 1.00350900  | -4.31361000 | H  | 1.66754700   | 2.59637800  | -1.68530300 |
| C  | -8.43249400  | 1.08851700  | -3.31353900 | H  | 0.02100200   | 3.18962800  | -1.45209700 |
| H  | -9.51761700  | 1.18228300  | -3.44448100 | H  | 1.35207600   | 4.35395000  | -1.70462500 |
| C  | -7.45475100  | 3.62961100  | -0.03904400 | C  | -1.07421800  | -3.36351400 | 1.19614300  |
| C  | -10.13647600 | 3.08996600  | -0.89908100 | H  | -0.02084200  | -3.14954100 | 1.40098400  |
| P  | -8.47615400  | 2.28299900  | -0.78568900 | H  | -1.66679600  | -2.55506400 | 1.63535200  |
| C  | -6.50190200  | -1.06442700 | -2.98035900 | H  | -1.35263600  | -4.31288700 | 1.65399600  |
| P  | -8.13976600  | -0.48657200 | -2.34605400 | O  | 1.77305900   | 4.47024200  | 0.80337100  |
| C  | -9.30084400  | -1.65157500 | -3.18923300 | O  | -1.77463000  | -4.42846600 | -0.85381800 |
| Ru | -8.32838300  | 0.02953400  | -0.01188300 | Cl | 10.92831200  | 0.27713100  | 0.24841800  |
| C  | -7.30976900  | 1.70187800  | 3.13251200  | Cl | -10.92416900 | -0.35651900 | -0.17108900 |
| P  | -8.49688800  | 0.54132200  | 2.32001500  |    |              |             |             |
| C  | -10.11634500 | 1.12895000  | 2.99207600  |    |              |             |             |
| P  | -8.16100800  | -2.23095700 | 0.76454600  |    |              |             |             |
| C  | -6.48492000  | -3.00567000 | 0.87055300  |    |              |             |             |
| C  | -9.15898100  | -3.60079000 | 0.02827900  |    |              |             |             |
| C  | -8.18539700  | -1.03056400 | 3.28771100  |    |              |             |             |
| H  | -7.09844900  | -1.11833800 | 3.40820500  |    |              |             |             |
| C  | -8.73688300  | -2.24911200 | 2.54083100  |    |              |             |             |
| H  | -8.61680000  | -0.94402500 | 4.29208300  |    |              |             |             |
| H  | -9.83275200  | -2.22101300 | 2.51607200  |    |              |             |             |
| H  | -8.44029100  | -3.18650700 | 3.02696100  |    |              |             |             |
| H  | 6.36994200   | 3.29896400  | -0.40191000 |    |              |             |             |

**Table S3.** Cartesian coordinates of optimized geometry of **2<sup>Cl</sup>**.

|    |              |             |             |   |              |             |             |
|----|--------------|-------------|-------------|---|--------------|-------------|-------------|
| C  | 2.82471200   | 0.36174900  | 0.06321800  | O | 0.99650500   | 2.49030100  | 0.02491700  |
| C  | 3.74078200   | -0.71803700 | 0.07892400  | H | -6.72951300  | 0.75113900  | -3.45765600 |
| C  | 3.19641500   | -2.03057500 | 0.10912200  | H | -7.30558800  | 2.41401700  | -3.73895500 |
| C  | 1.82669700   | -2.23925800 | 0.12192900  | H | -6.28969300  | 2.02714500  | -2.31580900 |
| C  | 1.44838900   | 0.15530000  | 0.07254300  | H | -9.45049500  | 0.01890400  | -3.88113000 |
| C  | 0.92803500   | -1.15970400 | 0.10285700  | H | -10.75770400 | 0.55741100  | -2.80365100 |
| H  | 3.87535200   | -2.87820100 | 0.12087000  | H | -9.99088900  | 1.71198300  | -3.93833600 |
| H  | 3.19571200   | 1.38062200  | 0.04030700  | H | -10.17540400 | 3.44315300  | 2.34988400  |
| H  | 1.42152100   | -3.24597100 | 0.14531400  | H | -10.98393400 | 2.19072900  | 1.35397300  |
| C  | 0.54068700   | 1.34271500  | 0.04634200  | H | -10.23152900 | 1.74477500  | 2.89027600  |
| C  | -0.91269700  | 1.08535500  | 0.04380000  | H | -6.30093100  | 2.41028200  | 1.98033500  |
| C  | -1.43328900  | -0.22945600 | 0.07654500  | H | -7.41349800  | 3.68650400  | 2.55941800  |
| C  | -0.52547800  | -1.41673600 | 0.11238900  | H | -7.42747800  | 2.07637700  | 3.31226600  |
| C  | -1.81087900  | 2.16484900  | 0.00667400  | H | -5.86068600  | -0.64172900 | 2.78072500  |
| C  | -3.18038600  | 1.95587700  | -0.00050800 | H | -7.16119600  | -0.11606100 | 3.87198800  |
| C  | -3.72530400  | 0.64338800  | 0.03180800  | H | -6.59864800  | -1.80110200 | 3.92584100  |
| C  | -2.80982300  | -0.43605600 | 0.07260300  | H | -9.27396700  | -2.54919400 | 3.75732400  |
| H  | -1.40536200  | 3.17138800  | -0.01776300 | H | -9.87547400  | -0.89174800 | 3.49207300  |
| H  | -3.85961800  | 2.80275600  | -0.03194300 | H | -10.31857000 | -2.16708500 | 2.35154100  |
| H  | -3.18059400  | -1.45496000 | 0.09948900  | H | -9.16810800  | -3.81955000 | -2.56368100 |
| C  | -5.12395800  | 0.42338300  | 0.02118500  | H | -10.31365100 | -2.58011800 | -1.96306500 |
| C  | 5.13866100   | -0.49342000 | 0.06089900  | H | -9.20744600  | -2.20106600 | -3.30005800 |
| C  | -6.34774500  | 0.23446900  | 0.00041900  | H | -5.63627300  | -2.25426600 | -1.35239400 |
| C  | 6.35945200   | -0.28585200 | 0.04298000  | H | -6.41600000  | -3.52099900 | -2.34982000 |
| H  | -8.88683400  | 4.32381900  | 0.26250800  | H | -6.40140400  | -1.82146800 | -2.88664900 |
| H  | -7.40093000  | 3.57754300  | -0.33513100 | H | 10.51416600  | 1.65381200  | 2.60275400  |
| C  | -8.46547800  | 3.39585900  | -0.14218600 | H | 9.43278300   | 2.46568000  | 3.77725800  |
| H  | -9.01816500  | 3.69681200  | -2.23650200 | H | 9.56692300   | 0.69255100  | 3.75785800  |
| C  | -9.17573500  | 2.96987600  | -1.43061800 | H | 6.67892000   | 2.13794600  | 3.73235300  |
| H  | -10.25717600 | 2.89321800  | -1.26484600 | H | 5.79921700   | 1.36405500  | 2.37783400  |
| C  | -7.30247200  | 2.61362400  | 2.36813500  | H | 6.73407500   | 0.37152100  | 3.50389200  |
| C  | -10.14192400 | 2.39967300  | 2.01773700  | H | 11.06839800  | -1.54481700 | 1.97535600  |
| P  | -8.55617500  | 2.03745900  | 1.13881500  | H | 9.90207600   | -1.54375200 | 3.31624900  |
| C  | -7.08559700  | 1.66463500  | -2.97092600 | H | 10.42724700  | -3.09050100 | 2.61361600  |
| P  | -8.58977100  | 1.27863900  | -1.96710800 | H | 7.14116100   | -2.15807000 | 2.93181600  |
| C  | -9.81947100  | 0.85407100  | -3.27887300 | H | 6.56359100   | -2.87087500 | 1.42080400  |
| Ru | -8.31784900  | -0.05783300 | 0.00633800  | H | 7.73870400   | -3.76231900 | 2.43649200  |

|    |             |             |             |    |              |             |             |
|----|-------------|-------------|-------------|----|--------------|-------------|-------------|
| C  | -6.79093600 | -0.94785900 | 3.26628700  | H  | 7.14617300   | -2.30391400 | -3.82232000 |
| P  | -8.03252300 | -1.39281400 | 1.97225000  | H  | 6.10099700   | -1.43190800 | -2.66087700 |
| C  | -9.51706600 | -1.79945000 | 2.99639400  | H  | 7.08582200   | -0.52761400 | -3.83042200 |
| P  | -8.06700300 | -2.15276900 | -1.13334900 | H  | 10.82390300  | -1.31873400 | -2.43880100 |
| C  | -6.47532400 | -2.47974400 | -2.01509200 | H  | 9.91082600   | -2.06120800 | -3.79136900 |
| C  | -9.31067000 | -2.75231900 | -2.36119400 | H  | 9.93009100   | -0.29213300 | -3.56657100 |
| C  | -7.41709400 | -3.07219600 | 1.43210600  | H  | 10.01634600  | 3.09668500  | -1.44886700 |
| H  | -6.33818200 | -2.97219000 | 1.26078000  | H  | 9.48633300   | 2.36412200  | -2.96735500 |
| C  | -8.12360300 | -3.51367200 | 0.14705800  | H  | 8.81964800   | 3.94462800  | -2.47893600 |
| H  | -7.55442600 | -3.80214000 | 2.23888300  | H  | 6.15822000   | 3.19970900  | -2.66873200 |
| H  | -9.18294400 | -3.71882600 | 0.34431200  | H  | 6.73488500   | 1.67931900  | -3.38633200 |
| H  | -7.68314500 | -4.43183500 | -0.25967600 | H  | 5.56065300   | 1.63016200  | -2.05297800 |
| H  | 7.27506700  | 4.35894300  | -0.40184500 | Cl | 10.89502700  | 0.54834900  | -0.13317200 |
| H  | 6.19050200  | 3.12879100  | 0.25828000  | Cl | -10.91429900 | -0.44023100 | -0.01984100 |
| C  | 7.24052900  | 3.35323700  | 0.03389000  |    |              |             |             |
| H  | 7.69513700  | 3.90212000  | 2.10157800  |    |              |             |             |
| C  | 8.09034700  | 3.26072900  | 1.30470300  |    |              |             |             |
| H  | 9.11797700  | 3.58663900  | 1.10232700  |    |              |             |             |
| C  | 6.42874800  | 2.16030400  | -2.45314400 |    |              |             |             |
| C  | 9.16041600  | 2.96893500  | -2.11540300 |    |              |             |             |
| P  | 7.80345500  | 2.08855700  | -1.22062300 |    |              |             |             |
| C  | 6.70604800  | 1.33588500  | 2.98687000  |    |              |             |             |
| P  | 8.19061700  | 1.49031700  | 1.89581100  |    |              |             |             |
| C  | 9.56025200  | 1.58945700  | 3.13205600  |    |              |             |             |
| Ru | 8.31703700  | 0.07323500  | -0.03609200 |    |              |             |             |
| C  | 7.05718200  | -1.41364700 | -3.19026400 |    |              |             |             |
| P  | 8.43116000  | -1.35106100 | -1.95636100 |    |              |             |             |
| C  | 9.91957300  | -1.25612400 | -3.04836000 |    |              |             |             |
| P  | 8.80969100  | -1.94414400 | 1.16198700  |    |              |             |             |
| C  | 7.43307800  | -2.77433700 | 2.07556700  |    |              |             |             |
| C  | 10.18874600 | -2.04534400 | 2.38751000  |    |              |             |             |
| C  | 8.46624100  | -3.12005100 | -1.35405700 |    |              |             |             |
| H  | 7.42732000  | -3.40349800 | -1.14490700 |    |              |             |             |
| C  | 9.31760000  | -3.23881500 | -0.08630100 |    |              |             |             |
| H  | 8.83191400  | -3.78149900 | -2.14861900 |    |              |             |             |
| H  | 10.37478600 | -3.05982300 | -0.31703100 |    |              |             |             |
| H  | 9.24364100  | -4.23941200 | 0.35637400  |    |              |             |             |
| O  | -0.98138000 | -2.56398000 | 0.14575900  |    |              |             |             |

**Table S4.** Cartesian coordinates of optimized geometry of **3<sup>Cl</sup>**.

|    |             |             |             |   |              |             |             |
|----|-------------|-------------|-------------|---|--------------|-------------|-------------|
| C  | 2.81899500  | 0.44347200  | 0.14557700  | H | -6.44943000  | -2.93010400 | -3.06398700 |
| C  | 3.72619600  | -0.60864100 | 0.11582500  | H | -5.68981700  | -1.63241200 | -2.08872500 |
| C  | 3.19521800  | -1.95301300 | 0.09703600  | H | -9.03406900  | -3.80998200 | -1.32281700 |
| C  | 1.84963300  | -2.19436000 | 0.10132100  | H | -10.29341300 | -2.68968600 | -1.88254200 |
| C  | 1.41052200  | 0.23195300  | 0.15085100  | H | -9.17534400  | -3.44839700 | -3.05845000 |
| C  | 0.90062100  | -1.12148700 | 0.12525400  | H | -9.86921800  | 2.94597500  | -3.16460200 |
| H  | 3.89905800  | -2.78052800 | 0.07656000  | H | -10.72063200 | 1.56087400  | -2.40913900 |
| H  | 3.18917400  | 1.46580300  | 0.16064100  | H | -10.33939800 | 2.99154600  | -1.44498300 |
| H  | 1.47711400  | -3.21637900 | 0.08445600  | H | -6.25825300  | 2.75246600  | -1.39796500 |
| C  | 0.49120700  | 1.29507900  | 0.17562700  | H | -7.19393100  | 3.53276900  | -2.70850700 |
| C  | -0.89088200 | 1.07719100  | 0.17006200  | H | -7.63638900  | 3.80528900  | -1.00864200 |
| C  | -1.40100300 | -0.27599100 | 0.13937600  | H | -6.36921700  | 2.59973300  | 1.76199200  |
| C  | -0.48156200 | -1.33936100 | 0.12077400  | H | -7.65906000  | 3.71751200  | 1.27008300  |
| C  | -1.83913100 | 2.15050500  | 0.19015300  | H | -7.43827200  | 3.33856400  | 2.99282200  |
| C  | -3.18472200 | 1.90988800  | 0.17460700  | H | -10.16557500 | 2.83004500  | 3.07402000  |
| C  | -3.71646500 | 0.56632400  | 0.13673800  | H | -10.41665700 | 2.97379600  | 1.31445500  |
| C  | -2.80990100 | -0.48651100 | 0.12413500  | H | -10.95372200 | 1.51132800  | 2.14957300  |
| H  | -1.46609900 | 3.17214900  | 0.21623900  | H | -9.41626400  | -3.64540900 | 2.70271900  |
| H  | -3.88752600 | 2.73831700  | 0.18889100  | H | -10.41257000 | -2.85600800 | 1.44209400  |
| H  | -3.18048700 | -1.50832000 | 0.09732900  | H | -9.05125100  | -3.90103400 | 0.98135800  |
| C  | -5.12645700 | 0.36115100  | 0.10638000  | H | -5.91383200  | -1.66737200 | 2.28471100  |
| C  | 5.13508300  | -0.40063600 | 0.09658200  | H | -6.73948900  | -3.04553800 | 3.07762300  |
| C  | -6.35007700 | 0.19076400  | 0.06649200  | H | -6.33352700  | -3.10322900 | 1.34356200  |
| C  | 6.35953700  | -0.23201500 | 0.07191300  | H | 10.50667700  | 2.25268500  | 2.15438700  |
| H  | -8.06436800 | 1.36119000  | -4.20297600 | H | 9.41127000   | 3.33191100  | 3.07251700  |
| H  | -6.70504000 | 0.70129200  | -3.28415000 | H | 9.53977100   | 1.60968200  | 3.49760900  |
| C  | -7.79988100 | 0.75090100  | -3.33099700 | H | 6.65779500   | 3.02648400  | 3.05106800  |
| H  | -7.97090300 | -1.21551200 | -4.27258000 | H | 5.79597200   | 1.92548900  | 1.92993900  |
| C  | -8.39375500 | -0.65743600 | -3.42852600 | H | 6.70570200   | 1.26164900  | 3.29326100  |
| H  | -9.47851600 | -0.60443400 | -3.58272900 | H | 10.97745000  | -1.02411600 | 2.44460300  |
| C  | -7.25468100 | 3.06654000  | -1.71901300 | H | 9.75059600   | -0.68437400 | 3.68522300  |
| C  | -9.97891600 | 2.34757000  | -2.25335700 | H | 10.28064600  | -2.35951600 | 3.41293200  |
| P  | -8.36533700 | 1.59018900  | -1.75984800 | H | 7.01116400   | -1.36953600 | 3.34477000  |
| C  | -6.47306200 | -2.39391700 | -2.10902400 | H | 6.47665200   | -2.41042000 | 2.02045900  |
| P  | -8.11887500 | -1.59618600 | -1.83412500 | H | 7.59268300   | -3.05218300 | 3.26678800  |
| C  | -9.26797900 | -3.02807700 | -2.05086200 | H | 7.19009900   | -3.19633100 | -3.10299800 |
| Ru | -8.34211900 | -0.04742000 | -0.01989100 | H | 6.14166000   | -2.04916600 | -2.21434900 |



|    |              |             |             |    |              |             |             |
|----|--------------|-------------|-------------|----|--------------|-------------|-------------|
| C  | -7.38879500  | 2.92908900  | 1.97791600  | H  | 7.14236400   | -1.48102200 | -3.56700900 |
| P  | -8.53707300  | 1.49203600  | 1.79763700  | H  | 10.86114600  | -1.88290400 | -1.98699400 |
| C  | -10.17767900 | 2.27979700  | 2.12662200  | H  | 9.96336700   | -2.95936000 | -3.10575900 |
| P  | -8.29112700  | -1.69269600 | 1.72014100  | H  | 9.97107000   | -1.19289000 | -3.34925200 |
| C  | -6.66320700  | -2.45259700 | 2.15967100  | H  | 10.13340100  | 2.61387900  | -2.10490900 |
| C  | -9.40219400  | -3.17012300 | 1.71559400  | H  | 9.63329300   | 1.53313900  | -3.41056800 |
| C  | -8.19954600  | 0.55682600  | 3.38148900  | H  | 8.98012500   | 3.19131100  | -3.34908700 |
| H  | -7.10926600  | 0.50422700  | 3.49136700  | H  | 6.31191900   | 2.43460500  | -3.43513200 |
| C  | -8.79616700  | -0.85201000 | 3.31127500  | H  | 6.89001400   | 0.77984300  | -3.72965500 |
| H  | -8.58813700  | 1.11690400  | 4.24053800  | H  | 5.67783500   | 1.07235600  | -2.46243900 |
| H  | -9.89194100  | -0.80375400 | 3.30980000  | H  | -0.85576800  | -2.36133000 | 0.09907900  |
| H  | -8.49557600  | -1.46031400 | 4.17292100  | H  | 0.86537100   | 2.31707900  | 0.19645400  |
| H  | 7.37077900   | 4.11892600  | -1.49944100 | Cl | 10.94072200  | 0.44202700  | -0.16178400 |
| H  | 6.25557200   | 3.09683200  | -0.58317300 | Cl | -10.94861200 | -0.37090500 | -0.14477700 |
| C  | 7.31353200   | 3.25568000  | -0.82545900 |    |              |             |             |
| H  | 7.71365400   | 4.30579700  | 1.05084900  |    |              |             |             |
| C  | 8.12529300   | 3.48388900  | 0.45278500  |    |              |             |             |
| H  | 9.16107800   | 3.74718000  | 0.20531000  |    |              |             |             |
| C  | 6.56263000   | 1.48129100  | -2.95709800 |    |              |             |             |
| C  | 9.29373000   | 2.33286100  | -2.74480500 |    |              |             |             |
| P  | 7.89838800   | 1.71230000  | -1.70138200 |    |              |             |             |
| C  | 6.69180500   | 2.05734700  | 2.54154700  |    |              |             |             |
| P  | 8.19435200   | 1.91733600  | 1.47255500  |    |              |             |             |
| C  | 9.54472100   | 2.32239400  | 2.66812400  |    |              |             |             |
| Ru | 8.34136300   | 0.05985600  | -0.03326900 |    |              |             |             |
| C  | 7.10193700   | -2.17322700 | -2.72147500 |    |              |             |             |
| P  | 8.46426700   | -1.80206800 | -1.52864900 |    |              |             |             |
| C  | 9.96154800   | -1.98867500 | -2.59765200 |    |              |             |             |
| P  | 8.75005300   | -1.59736100 | 1.64590600  |    |              |             |             |
| C  | 7.32237300   | -2.17384200 | 2.67060300  |    |              |             |             |
| C  | 10.07081200  | -1.40169800 | 2.92400800  |    |              |             |             |
| C  | 8.48300800   | -3.36650600 | -0.50321800 |    |              |             |             |
| H  | 7.43823000   | -3.59704700 | -0.26053300 |    |              |             |             |
| C  | 9.29402300   | -3.16119400 | 0.77959300  |    |              |             |             |
| H  | 8.87186800   | -4.20217800 | -1.09738200 |    |              |             |             |
| H  | 10.35840000  | -3.03928000 | 0.54477000  |    |              |             |             |
| H  | 9.20276000   | -4.01997100 | 1.45564200  |    |              |             |             |
| H  | -6.27327500  | -3.10325400 | -1.29954500 |    |              |             |             |

**Table S5.** Cartesian coordinates of optimized geometry of **1<sup>•</sup>C<sup>4</sup>**.

|   |             |             |             |   |              |             |             |
|---|-------------|-------------|-------------|---|--------------|-------------|-------------|
| C | -2.82746500 | 0.40788300  | 0.09445900  | H | -8.70784900  | 1.98777200  | -3.89086200 |
| C | -3.71398800 | -0.59015400 | -0.29525700 | C | -11.69707000 | 0.26356800  | 0.24385300  |
| C | -3.15657800 | -1.82533200 | -0.79135400 | C | -13.05143400 | 0.41894300  | 0.34104900  |
| C | -1.80747000 | -2.03160400 | -0.86359800 | C | 11.69775100  | -0.32051200 | -0.12333300 |
| C | -1.41745800 | 0.23533300  | 0.02256300  | C | 13.05189500  | -0.49592300 | -0.18178700 |
| C | -0.88179900 | -1.02064300 | -0.45079600 | C | 14.26174300  | -0.65220300 | -0.23318300 |
| H | -3.84114600 | -2.60537700 | -1.11120000 | C | -14.26144900 | 0.55747700  | 0.42744600  |
| H | -3.22168800 | 1.34181400  | 0.47911100  | H | -15.31792500 | 0.67845100  | 0.50300100  |
| H | -1.42148700 | -2.96924800 | -1.24934000 | H | 15.31805000  | -0.78880000 | -0.27840100 |
| C | -0.50620100 | 1.24090000  | 0.39761600  | H | 6.38063800   | -3.24564200 | -0.00098700 |
| C | 0.88242000  | 1.06242100  | 0.36202400  | H | 6.68927300   | -3.87196800 | 1.63906300  |
| C | 1.41804800  | -0.19386700 | -0.11057900 | H | 5.87356800   | -2.29489300 | 1.40074400  |
| C | 0.50680100  | -1.19882800 | -0.48725900 | H | 9.15032400   | -3.86958400 | -0.42543700 |
| C | 1.80799200  | 2.07242100  | 0.77742200  | H | 10.44617500  | -3.04882300 | 0.47005300  |
| C | 3.15709900  | 1.86375300  | 0.71153400  | H | 9.40913500   | -4.25533900 | 1.29032600  |
| C | 3.71445300  | 0.62720600  | 0.21896400  | H | 10.09330800  | 1.54188100  | 4.03909500  |
| C | 2.82803600  | -0.36831500 | -0.17735500 | H | 10.91035000  | 0.62429100  | 2.73542900  |
| H | 1.42183500  | 3.01067300  | 1.16150100  | H | 10.45527000  | 2.31243400  | 2.47326700  |
| H | 3.84176900  | 2.64192200  | 1.03570700  | H | 6.38410500   | 1.97313700  | 2.53391000  |
| H | 3.22259700  | -1.30264000 | -0.56067600 | H | 7.38331100   | 2.15869800  | 4.00750600  |
| C | 5.12473400  | 0.45698800  | 0.15252900  | H | 7.72720800   | 3.13660100  | 2.56389000  |
| C | -5.12431100 | -0.42615500 | -0.21464700 | H | 6.38589200   | 3.19733200  | -0.43464400 |
| C | 6.35168200  | 0.30653300  | 0.09673900  | H | 7.68618400   | 4.02002200  | 0.45311200  |
| C | -6.35168100 | -0.28712900 | -0.14048700 | H | 7.41858100   | 4.40342600  | -1.26206300 |
| H | 8.39029600  | -0.40474800 | 4.40723900  | H | 10.13873200  | 4.01607900  | -1.62243200 |
| H | 6.96755300  | -0.65303600 | 3.38762800  | H | 10.45290500  | 3.38981700  | 0.01672700  |
| C | 8.06318300  | -0.59975000 | 3.37882700  | H | 10.95228500  | 2.43800400  | -1.38719800 |
| H | 8.28800900  | -2.77486200 | 3.39095500  | H | 9.44540800   | -2.00978600 | -3.98067700 |
| C | 8.65654800  | -1.90316500 | 2.83695000  | H | 10.44858200  | -1.81774600 | -2.51111000 |
| H | 9.74942200  | -1.89388300 | 2.93201200  | H | 9.11025100   | -2.98648600 | -2.53441500 |
| C | 7.39336000  | 2.15504700  | 2.91198500  | H | 5.91466500   | -0.48996600 | -2.70040300 |
| C | 10.15162900 | 1.37871200  | 2.95740100  | H | 6.73304500   | -1.40262600 | -4.00735400 |
| P | 8.52065600  | 0.83647100  | 2.27421500  | H | 6.37866400   | -2.17601300 | -2.44133200 |
| C | 6.64802300  | -2.96690100 | 1.02324900  | H | -10.39721700 | 2.17367700  | 2.25633500  |
| P | 8.27609900  | -2.09013700 | 1.01603200  | H | -9.30048300  | 2.74881200  | 3.54913100  |
| C | 9.43318500  | -3.45262800 | 0.54514000  | H | -9.16265300  | 3.39906900  | 1.90045100  |
| C | 10.46828700 | -0.15866900 | -0.06795600 | H | -6.55950100  | 2.31901600  | 3.46597400  |

|    |              |             |             |   |              |             |             |
|----|--------------|-------------|-------------|---|--------------|-------------|-------------|
| Ru | 8.41726200   | 0.07415800  | 0.01351500  | H | -5.77152000  | 1.20040400  | 2.30859800  |
| C  | 7.39807400   | 3.60193300  | -0.51544500 | H | -6.38473500  | 2.76202300  | 1.74885800  |
| P  | 8.55068100   | 2.23732000  | -0.99049600 | H | -10.53268800 | 2.88485500  | -0.89057700 |
| C  | 10.18043700  | 3.11127800  | -1.00627700 | H | -9.16266600  | 3.87125500  | -0.33486600 |
| P  | 8.30617100   | -0.68992300 | -2.24677000 | H | -9.60756100  | 3.87986700  | -2.05558600 |
| C  | 6.67630300   | -1.24039900 | -2.92542800 | H | -6.44594300  | 3.15818700  | -0.90020300 |
| C  | 9.43854500   | -2.00402200 | -2.88515700 | H | -6.06669900  | 1.92583100  | -2.10939800 |
| C  | 8.16125800   | 2.04946200  | -2.80933300 | H | -6.93170800  | 3.41678000  | -2.59576100 |
| H  | 7.06792400   | 2.03762800  | -2.89864300 | H | -7.53369000  | -2.91578600 | -3.54013400 |
| C  | 8.75484900   | 0.74725000  | -3.35382000 | H | -6.44071100  | -2.35307300 | -2.23822100 |
| H  | 8.52520200   | 2.92184500  | -3.36531200 | H | -7.68681800  | -3.57055800 | -1.89433900 |
| H  | 9.85030300   | 0.80311700  | -3.36814300 | H | -11.05689500 | -1.34220400 | -2.30902000 |
| H  | 8.42333900   | 0.55132400  | -4.38062900 | H | -10.27539600 | -2.47109300 | -3.46009500 |
| H  | -8.09961600  | -2.15116800 | 3.89715200  | H | -10.45871000 | -2.90688800 | -1.74171400 |
| H  | -6.74931300  | -1.33959300 | 3.09368700  | H | -10.75577900 | -2.08718700 | 2.13066700  |
| C  | -7.84346900  | -1.40518000 | 3.13516800  | H | -10.38244700 | -3.32151700 | 0.92156100  |
| H  | -8.02660100  | 0.38206100  | 4.38230300  | H | -9.88890400  | -3.57709200 | 2.61528300  |
| C  | -8.44936400  | -0.03706900 | 3.46140900  | H | -7.21159700  | -4.04129400 | 2.05950000  |
| H  | -9.53258100  | -0.12566100 | 3.61091200  | H | -7.67446100  | -4.03890900 | 0.34341000  |
| C  | -7.28860200  | -3.42123600 | 1.15953100  | H | -6.29941200  | -3.04898000 | 0.88105100  |
| C  | -10.01235600 | -2.82780600 | 1.82568100  | O | 1.01108900   | -2.39675600 | -1.00462000 |
| P  | -8.41059000  | -1.98193200 | 1.45129300  | O | -1.01042500  | 2.43884800  | 0.91498300  |
| C  | -6.57051100  | 1.93395200  | 2.44045700  | C | 1.31600300   | -3.46967900 | -0.19751100 |
| P  | -8.19737400  | 1.15125700  | 2.03954500  | C | -1.31763800  | 3.51082500  | 0.10747800  |
| C  | -9.37959600  | 2.50068400  | 2.48501400  | C | 1.06658800   | -3.32576800 | 1.28395400  |
| C  | -10.46733600 | 0.12012900  | 0.15430300  | H | 1.65949000   | -2.50403000 | 1.69724900  |
| Ru | -8.41699900  | -0.08202900 | 0.00417100  | H | 0.01325000   | -3.10489500 | 1.48166600  |
| C  | -7.45902000  | -2.67212600 | -2.47466400 | H | 1.34426000   | -4.26020700 | 1.77196100  |
| P  | -8.63105100  | -1.31351300 | -2.03119800 | C | -1.06961100  | 3.36619100  | -1.37413100 |
| C  | -10.26359400 | -2.08297900 | -2.43573700 | H | -0.01641800  | 3.14542700  | -1.57273800 |
| P  | -8.41442800  | 1.81847200  | -1.44263500 | H | -1.66271000  | 2.54407600  | -1.78639200 |
| C  | -6.81142700  | 2.66610600  | -1.80697200 | H | -1.34803800  | 4.30026500  | -1.86240700 |
| C  | -9.53990600  | 3.25649400  | -1.15717600 | O | 1.76218000   | -4.45745700 | -0.73167800 |
| C  | -8.36640800  | -0.12717700 | -3.45225300 | O | -1.76447100  | 4.49839300  | 0.64148500  |
| H  | -7.28194600  | -0.04152800 | -3.59436800 |   |              |             |             |
| C  | -8.97098500  | 1.24257700  | -3.13050700 |   |              |             |             |
| H  | -8.78421600  | -0.54575000 | -4.37568400 |   |              |             |             |
| H  | -10.06560400 | 1.17980400  | -3.09707100 |   |              |             |             |

**Table S6.** Cartesian coordinates of optimized geometry of 2<sup>9</sup>C<sup>4</sup>.

|   |             |             |             |   |              |             |             |
|---|-------------|-------------|-------------|---|--------------|-------------|-------------|
| C | -2.83042800 | -0.31380500 | -0.04759200 | H | -9.34699800  | 4.31561400  | 0.08584200  |
| C | -3.73540600 | 0.77460800  | -0.04128100 | O | 1.00372800   | 2.57605600  | -0.04511100 |
| C | -3.17899500 | 2.08172300  | -0.04283500 | O | -1.02185700  | -2.45962700 | -0.06955100 |
| C | -1.80704600 | 2.27790200  | -0.04615100 | C | -11.65227800 | -0.59460500 | 0.02621100  |
| C | -1.45193400 | -0.12039300 | -0.05304500 | C | -12.99718800 | -0.83699800 | 0.05195600  |
| C | -0.91927200 | 1.18968300  | -0.05023100 | C | 11.67782900  | 0.42016200  | 0.10035600  |
| H | -3.84968900 | 2.93591800  | -0.03992900 | C | 13.03290700  | 0.59759200  | 0.12173900  |
| H | -3.21115100 | -1.32933400 | -0.04813000 | C | 14.24327000  | 0.75585700  | 0.14230800  |
| H | -1.39238100 | 3.28098500  | -0.04516600 | C | -14.19840600 | -1.05380900 | 0.07341400  |
| C | -0.55567200 | -1.31638600 | -0.06258500 | H | -15.24710400 | -1.24447500 | 0.09424800  |
| C | 0.90088300  | -1.07313100 | -0.06549400 | H | 15.30046000  | 0.89218300  | 0.16033400  |
| C | 1.43386800  | 0.23669200  | -0.05581000 | H | 6.88590600   | -0.37216100 | -3.54448700 |
| C | 0.53744500  | 1.43287100  | -0.04996000 | H | 7.44161600   | -1.99897200 | -4.01648200 |
| C | 1.78804800  | -2.16182000 | -0.07655500 | H | 6.38792300   | -1.77214800 | -2.58579100 |
| C | 3.15974100  | -1.96591500 | -0.07608400 | H | 9.64762100   | 0.32027800  | -3.80726800 |
| C | 3.71701000  | -0.65888900 | -0.06131500 | H | 10.89815600  | -0.36415400 | -2.74703400 |
| C | 2.81268600  | 0.42983400  | -0.05241900 | H | 10.15582100  | -1.36845000 | -4.02970600 |
| H | 1.37289400  | -3.16465300 | -0.08501400 | H | 10.17696800  | -3.76727200 | 1.99219900  |
| H | 3.83067700  | -2.81985300 | -0.08535100 | H | 11.01212400  | -2.44190200 | 1.12399300  |
| H | 3.19305600  | 1.44549500  | -0.04315400 | H | 10.26581900  | -2.13245100 | 2.69684500  |
| C | 5.11941500  | -0.45374900 | -0.05340400 | H | 6.32596100   | -2.64532000 | 1.71208400  |
| C | -5.13674300 | 0.56269300  | -0.03109400 | H | 7.42136900   | -3.98717900 | 2.16239800  |
| C | 6.34593400  | -0.28054100 | -0.04380600 | H | 7.44749500   | -2.46372100 | 3.07787000  |
| C | -6.35939300 | 0.36462000  | -0.01073900 | H | 5.90060400   | 0.34464700  | 2.78976900  |
| H | 8.88050800  | -4.39915800 | -0.18978000 | H | 7.15382900   | -0.34089000 | 3.84616600  |
| H | 7.41842600  | -3.55812900 | -0.71797800 | H | 6.64501100   | 1.34709800  | 4.07249200  |
| C | 8.48409200  | -3.42347400 | -0.49556700 | H | 9.35230600   | 1.98657800  | 4.05498600  |
| H | 9.05815600  | -3.50519600 | -2.60443800 | H | 9.91383300   | 0.36170100  | 3.58306400  |
| C | 9.22007700  | -2.87539100 | -1.72144400 | H | 10.40756700  | 1.76347800  | 2.62516900  |
| H | 10.30075400 | -2.84347600 | -1.53551000 | H | 9.37760100   | 3.96904800  | -2.12005500 |
| C | 7.32241500  | -2.89908200 | 2.08241700  | H | 10.47211900  | 2.62932000  | -1.66151400 |
| C | 10.16350700 | -2.69594300 | 1.76386000  | H | 9.35844500   | 2.44399800  | -3.03303600 |
| P | 8.58826900  | -2.21260900 | 0.92406000  | H | 5.78303500   | 2.42288200  | -1.09699300 |
| C | 7.20997900  | -1.34724300 | -3.16701200 | H | 6.62138600   | 3.75017500  | -1.95882600 |
| P | 8.68482300  | -1.12050500 | -2.07553000 | H | 6.53698200   | 2.11674100  | -2.66702100 |
| C | 9.97340300  | -0.58448200 | -3.28655600 | H | -10.53155500 | -1.33857100 | 2.77658400  |
| C | 10.44769600 | 0.25735200  | 0.08521700  | H | -9.44334100  | -2.09611200 | 3.97908300  |

|    |              |             |             |   |              |             |             |
|----|--------------|-------------|-------------|---|--------------|-------------|-------------|
| Ru | 8.39828700   | -0.00848400 | 0.01950900  | H | -9.54290600  | -0.32614000 | 3.84963700  |
| C  | 6.82644900   | 0.56451000  | 3.32763400  | H | -6.68107100  | -1.80781700 | 3.86285400  |
| P  | 8.11199200   | 1.10396300  | 2.11473000  | H | -5.81954500  | -1.14356200 | 2.43922200  |
| C  | 9.58647500   | 1.33570800  | 3.20558200  | H | -6.71772500  | -0.06090700 | 3.51143700  |
| P  | 8.20555000   | 2.19529600  | -0.88529400 | H | -11.08314400 | 1.73777900  | 1.96105100  |
| C  | 6.63442600   | 2.67843800  | -1.73244800 | H | -9.87694300  | 1.85196800  | 3.26060500  |
| C  | 9.47727600   | 2.88121100  | -2.03763000 | H | -10.44136200 | 3.33323000  | 2.45648300  |
| C  | 7.56977800   | 2.85634300  | 1.75992300  | H | -7.12839800  | 2.45212000  | 2.73732600  |
| H  | 6.48940700   | 2.81948100  | 1.57339900  | H | -6.61725600  | 3.06771400  | 1.16127700  |
| C  | 8.30398400   | 3.40700900  | 0.53418300  | H | -7.76906800  | 4.01137100  | 2.15702400  |
| H  | 7.72858200   | 3.48724400  | 2.64270200  | H | -7.35348400  | 2.08610100  | -3.99461200 |
| H  | 9.36891100   | 3.54692000  | 0.75708000  | H | -6.26553100  | 1.32351300  | -2.79513300 |
| H  | 7.90327100   | 4.38069800  | 0.22774900  | H | -7.26285800  | 0.31578800  | -3.86447900 |
| H  | -7.42272600  | -4.31250600 | -0.09521200 | H | -10.97791500 | 1.15738700  | -2.44468800 |
| H  | -6.29566800  | -3.06008200 | 0.44057100  | H | -10.11453500 | 1.81454100  | -3.87029100 |
| C  | -7.35606200  | -3.27898700 | 0.26529300  | H | -10.08937500 | 0.06769100  | -3.51706000 |
| H  | -7.75213100  | -3.66580200 | 2.38107100  | H | -10.16734400 | -3.08325100 | -1.15672400 |
| C  | -8.16274600  | -3.07820100 | 1.55127600  | H | -9.67118100  | -2.46280600 | -2.73566300 |
| H  | -9.20121700  | -3.40024400 | 1.40525300  | H | -9.01706200  | -4.01871800 | -2.16142000 |
| C  | -6.59850600  | -2.27718200 | -2.32154600 | H | -6.34958600  | -3.33357600 | -2.47068900 |
| C  | -9.32908900  | -3.01454500 | -1.85438200 | H | -6.92444100  | -1.85786800 | -3.27760400 |
| P  | -7.93549100  | -2.09578600 | -1.05904400 | H | -5.71219200  | -1.73393600 | -1.98393300 |
| C  | -6.71263100  | -1.05968800 | 3.06328900  |   |              |             |             |
| P  | -8.22057900  | -1.26813300 | 2.01361900  |   |              |             |             |
| C  | -9.56530300  | -1.26027600 | 3.28149300  |   |              |             |             |
| C  | -10.43103500 | -0.37566500 | 0.00008700  |   |              |             |             |
| Ru | -8.39772700  | -0.00100200 | -0.00602400 |   |              |             |             |
| C  | -7.23383300  | 1.25002200  | -3.29688100 |   |              |             |             |
| P  | -8.57436700  | 1.26575800  | -2.02444700 |   |              |             |             |
| C  | -10.08641000 | 1.06698400  | -3.07007500 |   |              |             |             |
| P  | -8.85348300  | 2.09343800  | 1.04802200  |   |              |             |             |
| C  | -7.46078400  | 3.00508900  | 1.85309300  |   |              |             |             |
| C  | -10.19617400 | 2.27635000  | 2.30451000  |   |              |             |             |
| C  | -8.61868300  | 3.07629100  | -1.56208700 |   |              |             |             |
| H  | -7.57762300  | 3.39002400  | -1.41645900 |   |              |             |             |
| C  | -9.42288900  | 3.28304100  | -0.27555900 |   |              |             |             |
| H  | -9.02519800  | 3.66723300  | -2.39154200 |   |              |             |             |
| H  | -10.48535500 | 3.07419300  | -0.45103200 |   |              |             |             |

**Table S7.** Cartesian coordinates of optimized geometry of **3<sup>•</sup>C<sup>4</sup>**.

|   |             |             |             |   |              |             |             |
|---|-------------|-------------|-------------|---|--------------|-------------|-------------|
| C | -2.82217900 | -0.42463400 | 0.06740800  | H | -9.12300000  | 4.21998200  | 1.10535000  |
| C | -3.72014500 | 0.60517300  | -0.18318800 | C | -11.70211200 | -0.42325400 | 0.11132900  |
| C | -3.17800200 | 1.90604900  | -0.50393800 | C | -13.05658800 | -0.59564700 | 0.16907300  |
| C | -1.83043500 | 2.12922100  | -0.55983700 | C | 11.70507200  | 0.39237400  | -0.06394400 |
| C | -1.41172800 | -0.23078300 | 0.02068700  | C | 13.05993500  | 0.56836100  | -0.09557000 |
| C | -0.89058600 | 1.07962800  | -0.30094800 | C | 14.27066900  | 0.72497800  | -0.12342800 |
| H | -3.87469100 | 2.71587600  | -0.70219200 | C | -14.26687700 | -0.75001200 | 0.21958700  |
| H | -3.20095100 | -1.41458200 | 0.31034500  | H | -15.32343500 | -0.88441500 | 0.26489100  |
| H | -1.44942900 | 3.11868200  | -0.80347100 | H | 15.32754400  | 0.86216800  | -0.14846900 |
| C | -0.50174100 | -1.27027300 | 0.27962400  | H | 6.55280400   | 2.12947100  | -2.66316900 |
| C | 0.88222200  | -1.06892500 | 0.23533700  | H | 6.79852400   | 1.15384300  | -4.13433600 |
| C | 1.40358000  | 0.24114300  | -0.08712300 | H | 5.93329600   | 0.47327500  | -2.71903100 |
| C | 0.49345100  | 1.28044600  | -0.34733000 | H | 9.35165100   | 2.66877900  | -2.85811600 |
| C | 1.82141400  | -2.11722500 | 0.50053600  | H | 10.57038000  | 1.38411300  | -2.74053900 |
| C | 3.16896000  | -1.89240800 | 0.45252400  | H | 9.54900200   | 1.52403300  | -4.20439800 |
| C | 3.71186900  | -0.59216500 | 0.13141700  | H | 10.14154700  | -4.06996700 | -1.28764100 |
| C | 2.81431000  | 0.43553500  | -0.12933000 | H | 10.93003900  | -2.46263200 | -1.28361000 |
| H | 1.44000100  | -3.10642100 | 0.74464000  | H | 10.55193300  | -3.26118300 | 0.24700500  |
| H | 3.86443300  | -2.70107500 | 0.65940000  | H | 6.46621800   | -3.19534800 | 0.08451700  |
| H | 3.19359900  | 1.42469800  | -0.37410300 | H | 7.46457400   | -4.46612200 | -0.68529400 |
| C | 5.12428300  | -0.40074400 | 0.09173900  | H | 7.85530200   | -3.89060000 | 0.95053500  |
| C | -5.13179100 | 0.41689400  | -0.12910300 | H | 6.26715700   | -1.42773500 | 2.72626700  |
| C | 6.35038200  | -0.24192000 | 0.05895700  | H | 7.50826400   | -2.68719800 | 2.88451400  |
| C | -6.35830400 | 0.26699000  | -0.07290200 | H | 7.26037500   | -1.53238000 | 4.21369100  |
| H | 8.32599100  | -3.23020500 | -3.00274700 | H | 10.01445800  | -1.14035300 | 4.17484300  |
| H | 6.94177700  | -2.22746600 | -2.54377300 | H | 10.29744900  | -2.10243800 | 2.70127600  |
| C | 8.03708700  | -2.28179600 | -2.53376200 | H | 10.88710600  | -0.43636200 | 2.77716800  |
| H | 8.23949100  | -0.99266200 | -4.28909500 | H | 9.37675500   | 4.45901800  | 0.71863700  |
| C | 8.63947100  | -1.08297900 | -3.27211500 | H | 10.38628000  | 3.18415400  | -0.02853000 |
| H | 9.72696700  | -1.19810800 | -3.36029500 | H | 9.01497700   | 3.87845400  | -0.92173600 |
| C | 7.47979700  | -3.58740900 | -0.03116400 | H | 5.89415300   | 2.47167500  | 1.26103400  |
| C | 10.20219100 | -3.10210800 | -0.77795500 | H | 6.69195200   | 4.07505700  | 1.27974700  |
| P | 8.55448100  | -2.26161800 | -0.73961800 | H | 6.30275200   | 3.26952600  | -0.26205700 |
| C | 6.75238200  | 1.12117200  | -3.04026300 | H | -10.47083300 | -1.88948200 | 2.51098900  |
| P | 8.33988700  | 0.50150300  | -2.32200200 | H | -9.35031900  | -2.91001900 | 3.46357100  |
| C | 9.57267500  | 1.62891900  | -3.11411600 | H | -9.40989600  | -1.15338900 | 3.72913700  |
| C | 10.47438000 | 0.23088000  | -0.03323700 | H | -6.58940200  | -2.65671400 | 3.27192300  |

|    |              |             |             |   |              |             |             |
|----|--------------|-------------|-------------|---|--------------|-------------|-------------|
| Ru | 8.42300200   | -0.00231800 | 0.01149100  | H | -5.77632800  | -1.69591100 | 1.99518700  |
| C  | 7.26063800   | -1.64949900 | 3.12438700  | H | -6.59939400  | -0.87545900 | 3.32832400  |
| P  | 8.48544100   | -0.50524400 | 2.34502600  | H | -10.86685000 | 1.35267800  | 2.49546600  |
| C  | 10.07433200  | -1.10032800 | 3.08168700  | H | -9.57098900  | 1.13561200  | 3.69128800  |
| P  | 8.27689500   | 2.25827200  | 0.75996200  | H | -10.11336900 | 2.77644400  | 3.27595200  |
| C  | 6.63370100   | 3.10776500  | 0.76866200  | H | -6.84759000  | 1.73033100  | 3.11422400  |
| C  | 9.37108700   | 3.57764200  | 0.06794400  | H | -6.39413300  | 2.64314500  | 1.67035200  |
| C  | 8.15430700   | 1.07586000  | 3.28963100  | H | -7.42637000  | 3.40513300  | 2.92177700  |
| H  | 7.06443000   | 1.18247700  | 3.35608400  | H | -7.46192800  | 2.89550100  | -3.47631700 |
| C  | 8.76239000   | 2.27920000  | 2.56333400  | H | -6.36436800  | 1.82056500  | -2.55585100 |
| H  | 8.53519400   | 0.98812000  | 4.31417000  | H | -7.47325900  | 1.14181500  | -3.76592900 |
| H  | 9.85780000   | 2.23193000  | 2.59361100  | H | -11.05371100 | 1.78144900  | -1.96516200 |
| H  | 8.45978100   | 3.22533800  | 3.02819100  | H | -10.22977300 | 2.70937700  | -3.25730700 |
| H  | -7.61739200  | -4.20295400 | -1.10836100 | H | -10.27878600 | 0.92846300  | -3.30652500 |
| H  | -6.42382200  | -3.10862100 | -0.39584200 | H | -10.40992200 | -2.71663900 | -1.62969200 |
| C  | -7.49886300  | -3.27490300 | -0.53608000 | H | -10.01629000 | -1.78488200 | -3.07884200 |
| H  | -7.75536800  | -4.11252800 | 1.46804300  | H | -9.38277200  | -3.44217000 | -2.90488000 |
| C  | -8.20872100  | -3.35422400 | 0.81846700  | H | -6.72085300  | -2.75801800 | -3.29830300 |
| H  | -9.26157300  | -3.63054100 | 0.68130900  | H | -7.31058900  | -1.13520600 | -3.71991000 |
| C  | -6.91944900  | -1.75400700 | -2.90737200 | H | -5.99024200  | -1.30877300 | -2.54285000 |
| C  | -9.62750700  | -2.51980100 | -2.36677800 | H | 0.87649400   | 2.26989900  | -0.59058400 |
| P  | -8.13851400  | -1.82185000 | -1.51993500 | H | -0.88477100  | -2.25965800 | 0.52317400  |
| C  | -6.63788100  | -1.74579600 | 2.66528600  |   |              |             |             |
| P  | -8.19443100  | -1.68780400 | 1.66830500  |   |              |             |             |
| C  | -9.48111100  | -1.93958700 | 2.97223000  |   |              |             |             |
| C  | -10.47174600 | -0.26644200 | 0.05513300  |   |              |             |             |
| Ru | -8.42478000  | -0.00031800 | -0.00632000 |   |              |             |             |
| C  | -7.35849000  | 1.91418300  | -3.00029500 |   |              |             |             |
| P  | -8.62993400  | 1.69369200  | -1.67649200 |   |              |             |             |
| C  | -10.20065000 | 1.79950000  | -2.64785400 |   |              |             |             |
| P  | -8.68794000  | 1.82081500  | 1.51270300  |   |              |             |             |
| C  | -7.19748800  | 2.47425900  | 2.39140500  |   |              |             |             |
| C  | -9.93273300  | 1.77169500  | 2.87835700  |   |              |             |             |
| C  | -8.55624000  | 3.35569600  | -0.82202000 |   |              |             |             |
| H  | -7.49403800  | 3.59097200  | -0.68093100 |   |              |             |             |
| C  | -9.27284700  | 3.29833300  | 0.53013100  |   |              |             |             |
| H  | -8.97921600  | 4.13231900  | -1.47052500 |   |              |             |             |
| H  | -10.35305600 | 3.17317900  | 0.38572100  |   |              |             |             |

**Table S8.** Cartesian coordinates of optimized geometry of  $[1^{Cl}]^+$ .

|    |             |             |             |   |              |             |             |
|----|-------------|-------------|-------------|---|--------------|-------------|-------------|
| C  | -2.82983300 | -0.38230600 | -0.13301100 | H | 7.58596000   | -1.99734300 | -4.13495600 |
| C  | -3.73063200 | 0.65789600  | 0.18094900  | H | 6.45055200   | -1.81722800 | -2.72198500 |
| C  | -3.16489800 | 1.94421200  | 0.57491000  | H | 9.91232700   | 0.20918300  | -3.74340900 |
| C  | -1.79850600 | 2.15804100  | 0.62121800  | H | 11.08560500  | -0.56741200 | -2.60346200 |
| C  | -1.40515400 | -0.20306600 | -0.07824200 | H | 10.35340500  | -1.53288100 | -3.96745200 |
| C  | -0.86312400 | 1.10447300  | 0.28303100  | H | 10.17569600  | -3.84362800 | 2.08266900  |
| H  | -3.85757100 | 2.76281600  | 0.84124800  | H | 11.02733800  | -2.54066600 | 1.13008900  |
| H  | -3.23340700 | -1.36125600 | -0.44007700 | H | 10.30956300  | -2.15349000 | 2.73574000  |
| H  | -1.40779200 | 3.14240300  | 0.93199100  | H | 7.45626500   | -2.44234700 | 3.20137800  |
| C  | -0.48698800 | -1.26340600 | -0.36857300 | H | 6.27311400   | -2.65741400 | 1.84470300  |
| C  | 0.91799000  | -1.07667700 | -0.35677500 | H | 7.37912400   | -4.02147400 | 2.32165500  |
| C  | 1.45796000  | 0.23291600  | 0.00438800  | H | 5.69715900   | 0.69397600  | 2.68562100  |
| C  | 0.54476800  | 1.29345000  | 0.29239800  | H | 6.80844200   | -0.24376200 | 3.76299200  |
| C  | 1.85322300  | -2.13541500 | -0.69329000 | H | 6.51917800   | 1.51431800  | 4.08730700  |
| C  | 3.22012900  | -1.92972100 | -0.64213400 | H | 9.28126600   | 1.92098000  | 4.20987100  |
| C  | 3.77548800  | -0.64213000 | -0.24330300 | H | 9.70450500   | 0.21846300  | 3.74179900  |
| C  | 2.88300700  | 0.40857900  | 0.06794500  | H | 10.41579400  | 1.59434500  | 2.81727100  |
| H  | 1.45774800  | -3.11736700 | -1.00448500 | H | 10.53982600  | 2.49773300  | -1.82717700 |
| H  | 3.91445100  | -2.74803700 | -0.90385100 | H | 9.29941200   | 2.39984400  | -3.14878200 |
| H  | 3.29115800  | 1.38450100  | 0.37880500  | H | 9.50530700   | 3.94395300  | -2.22760500 |
| C  | 5.19615400  | -0.45128500 | -0.16706800 | H | 5.81859300   | 2.62506700  | -0.95121200 |
| C  | -5.15803400 | 0.47653600  | 0.12190200  | H | 6.69054200   | 3.84819100  | -1.98118900 |
| C  | 6.43749600  | -0.28379900 | -0.09934600 | H | 6.44852000   | 2.14628300  | -2.57069100 |
| C  | -6.39454900 | 0.29987800  | 0.06937700  | H | -10.38688100 | -2.16184800 | -2.41500900 |
| H  | 8.74616400  | -4.52721700 | -0.10654900 | H | -9.31458900  | -2.55536700 | -3.84020700 |
| H  | 7.31638500  | -3.59288600 | -0.66648600 | H | -9.05122800  | -3.36983200 | -2.24426000 |
| C  | 8.40533200  | -3.51684100 | -0.43469000 | H | -6.57848300  | -2.05966900 | -3.80235700 |
| H  | 9.01200200  | -3.66969600 | -2.55961400 | H | -5.77110800  | -0.90117300 | -2.65041200 |
| C  | 9.20013200  | -3.02472200 | -1.66918000 | H | -6.24667600  | -2.54328600 | -2.08314800 |
| H  | 10.29755200 | -3.05229400 | -1.46939500 | H | -8.84853600  | -4.06960000 | -0.01741100 |
| C  | 7.29172100  | -2.91619600 | 2.20821800  | H | -9.33234900  | -4.24374900 | 1.71832000  |
| C  | 10.17919600 | -2.76234500 | 1.81286700  | H | -10.32201300 | -3.20656800 | 0.58936800  |
| P  | 8.56754800  | -2.30294700 | 0.99652400  | H | -6.15604500  | -3.15706000 | 0.63671600  |
| C  | 7.31928800  | -1.37047900 | -3.25311600 | H | -5.90087200  | -2.03673900 | 2.02207500  |
| P  | 8.77112600  | -1.23652000 | -2.09149600 | H | -6.67190700  | -3.66359100 | 2.30339800  |
| C  | 10.17107300 | -0.73328000 | -3.21278300 | H | -7.59491700  | 2.59453000  | 3.82660200  |
| Ru | 8.39103200  | -0.02522000 | 0.04141500  | H | -6.42541800  | 2.10534200  | 2.51862000  |



|    |              |             |             |    |              |             |             |
|----|--------------|-------------|-------------|----|--------------|-------------|-------------|
| C  | 6.63068200   | 0.74592000  | 3.28771000  | H  | -7.68370100  | 3.36050400  | 2.18834300  |
| P  | 8.06151800   | 1.19109200  | 2.18007500  | H  | -11.10417300 | 1.05824100  | 2.39268800  |
| C  | 9.50850300   | 1.24394100  | 3.35443300  | H  | -10.32802000 | 2.06771000  | 3.70478500  |
| P  | 8.26637000   | 2.26076500  | -0.90687300 | H  | -10.48579800 | 2.70637700  | 2.01321800  |
| C  | 6.64854100   | 2.77738900  | -1.67545300 | H  | -11.00568800 | 2.04742200  | -1.85768300 |
| C  | 9.53034500   | 2.83240800  | -2.15009600 | H  | -10.62572800 | 3.25445100  | -0.58033100 |
| C  | 7.71611600   | 3.00124000  | 1.77226200  | H  | -10.24203600 | 3.64416500  | -2.31149300 |
| H  | 6.61753800   | 3.08420400  | 1.59574200  | H  | -6.49360500  | 3.25268100  | -0.75242800 |
| C  | 8.50803100   | 3.46174500  | 0.52384500  | H  | -7.57598300  | 4.29046000  | -1.78582100 |
| H  | 7.95324800   | 3.63163400  | 2.66126500  | H  | -7.93103500  | 4.07769100  | -0.02413400 |
| H  | 9.60312500   | 3.48973300  | 0.73398800  | O  | 1.06373900   | 2.53330400  | 0.68209900  |
| H  | 8.20294300   | 4.48616800  | 0.20402200  | O  | -0.99829400  | -2.50573700 | -0.76406100 |
| H  | -8.37637500  | 2.47200400  | -3.77680300 | C  | 1.34167100   | 3.56909900  | -0.20367000 |
| H  | -6.92802700  | 1.66892900  | -3.07544500 | C  | -1.31364400  | -3.52800100 | 0.12298300  |
| C  | -8.04464800  | 1.66431800  | -3.08133300 | C  | 1.00961300   | 3.34870900  | -1.67791500 |
| H  | -8.15922700  | -0.03453700 | -4.50341500 | H  | 1.54744900   | 2.46043800  | -2.07950500 |
| C  | -8.58143500  | 0.27850700  | -3.51864100 | H  | -0.08141300  | 3.17017600  | -1.81195400 |
| H  | -9.69177700  | 0.30798500  | -3.63147000 | H  | 1.31111800   | 4.25649100  | -2.24021000 |
| C  | -7.54411700  | 3.56937900  | -0.93580600 | C  | -1.05289500  | -3.28337100 | 1.60795700  |
| C  | -10.27883000 | 2.83011000  | -1.55037300 | H  | 0.02435200   | -3.06799400 | 1.79022300  |
| P  | -8.58774400  | 2.06376000  | -1.31300400 | H  | -1.63795000  | -2.40907800 | 1.97269100  |
| C  | -6.54009600  | -1.69876200 | -2.74812000 | H  | -1.35253800  | -4.19400500 | 2.16666700  |
| P  | -8.20547300  | -1.03808600 | -2.20772200 | O  | 1.82270300   | 4.57475800  | 0.25567000  |
| C  | -9.35315400  | -2.41741000 | -2.73434800 | O  | -1.76862700  | -4.54358300 | -0.34171900 |
| Ru | -8.39887600  | 0.01738100  | -0.02059900 | Cl | 10.87060700  | 0.32623300  | 0.19559400  |
| C  | -7.47255600  | 2.41339300  | 2.73309200  | Cl | -10.96078600 | -0.40887800 | -0.13833000 |
| P  | -8.64096200  | 1.07045300  | 2.15780000  |    |              |             |             |
| C  | -10.30295000 | 1.79266000  | 2.62455500  |    |              |             |             |
| P  | -8.26638500  | -2.03718000 | 1.27816400  |    |              |             |             |
| C  | -6.58883400  | -2.80233100 | 1.60012300  |    |              |             |             |
| C  | -9.29506000  | -3.54001400 | 0.85403900  |    |              |             |             |
| C  | -8.35376600  | -0.25420500 | 3.48336000  |    |              |             |             |
| H  | -7.25070300  | -0.29904100 | 3.65126600  |    |              |             |             |
| C  | -8.88672200  | -1.63289700 | 3.01974200  |    |              |             |             |
| H  | -8.81891900  | 0.06443400  | 4.44658700  |    |              |             |             |
| H  | -10.00115300 | -1.62417400 | 2.96221800  |    |              |             |             |
| H  | -8.59494100  | -2.44499800 | 3.72807000  |    |              |             |             |
| H  | 7.03170300   | -0.35202800 | -3.59970500 |    |              |             |             |

**Table S9.** Cartesian coordinates of optimized geometry of  $[2^{Cl}]^+$ .

|    |              |             |             |   |              |             |             |
|----|--------------|-------------|-------------|---|--------------|-------------|-------------|
| C  | 2.83583300   | 0.39265600  | -0.04478400 | O | 0.96478500   | 2.53324600  | -0.12786900 |
| C  | 3.76253400   | -0.69824400 | -0.00622400 | H | -6.82282500  | 1.20257000  | -3.32187900 |
| C  | 3.20915300   | -2.02362900 | 0.04001700  | H | -7.63674300  | 2.80318600  | -3.60316000 |
| C  | 1.82351100   | -2.23530100 | 0.05231600  | H | -6.61375600  | 2.52887400  | -2.12093100 |
| C  | 1.44276300   | 0.18303500  | -0.03569600 | H | -9.49556300  | 0.18719600  | -3.92368000 |
| C  | 0.91472900   | -1.14438900 | 0.01582000  | H | -10.90123800 | 0.47157300  | -2.81073000 |
| H  | 3.89690800   | -2.88804300 | 0.06732800  | H | -10.27983500 | 1.81789900  | -3.86942500 |
| H  | 3.21323400   | 1.42843500  | -0.08333000 | H | -10.34197200 | 3.15624500  | 2.81920300  |
| H  | 1.41433000   | -3.26029600 | 0.09078800  | H | -11.14594100 | 1.87022200  | 1.80315700  |
| C  | 0.52599100   | 1.38777200  | -0.08286400 | H | -10.14592500 | 1.39839200  | 3.22948800  |
| C  | -0.96488700  | 1.12458900  | -0.07310800 | H | -6.40083400  | 2.62771000  | 1.88113600  |
| C  | -1.48263800  | -0.20177600 | -0.01362200 | H | -7.59411100  | 3.66980000  | 2.77817900  |
| C  | -0.56027800  | -1.40934200 | 0.03348900  | H | -7.27729000  | 1.97049000  | 3.32052600  |
| C  | -1.86291800  | 2.22144600  | -0.12280400 | H | -5.91136200  | -0.69604300 | 2.85101000  |
| C  | -3.25105300  | 2.01119000  | -0.11429000 | H | -7.31041400  | -0.32300700 | 3.94369300  |
| C  | -3.78832700  | 0.68512600  | -0.04988000 | H | -6.60543600  | -1.98954700 | 3.92592900  |
| C  | -2.87793500  | -0.41100400 | 0.00087400  | H | -9.24300400  | -2.92383600 | 3.64124400  |
| H  | -1.44786100  | 3.24310600  | -0.16932200 | H | -10.00393900 | -1.29164200 | 3.39756200  |
| H  | -3.94215600  | 2.87194500  | -0.15610600 | H | -10.28218800 | -2.58857500 | 2.17991300  |
| H  | -3.25675400  | -1.44558800 | 0.05112700  | H | -9.30909700  | -3.80014700 | -2.71429000 |
| C  | -5.21592600  | 0.46026000  | -0.03528500 | H | -10.46596800 | -2.65044300 | -1.89635500 |
| C  | 5.18290600   | -0.47314800 | -0.01221100 | H | -9.50447400  | -2.10729400 | -3.32984100 |
| C  | -6.44833500  | 0.26102700  | -0.02482300 | H | -5.69416000  | -2.14936900 | -1.69054900 |
| C  | 6.41722500   | -0.27343300 | -0.00293700 | H | -6.54399000  | -3.33055800 | -2.78554100 |
| H  | -9.46332400  | 4.29114000  | 0.58110800  | H | -6.61911600  | -1.54661900 | -3.11866300 |
| H  | -7.88665600  | 3.82126500  | -0.13318200 | H | 10.56802100  | 1.62394800  | 2.70553400  |
| C  | -8.91625100  | 3.45319400  | 0.08886900  | H | 9.46739700   | 2.52202200  | 3.85310100  |
| H  | -9.61144200  | 3.80214900  | -1.98375400 | H | 9.54101700   | 0.71309800  | 3.88446500  |
| C  | -9.62758400  | 2.99893500  | -1.20965900 | H | 6.70186500   | 2.20147300  | 3.79471200  |
| H  | -10.69562500 | 2.74538400  | -1.01250600 | H | 5.78918200   | 1.51872600  | 2.37306700  |
| C  | -7.36601100  | 2.63480100  | 2.43314900  | H | 6.65940600   | 0.41050900  | 3.49530900  |
| C  | -10.24281100 | 2.13036200  | 2.39569300  | H | 11.08066100  | -1.48708200 | 2.20065500  |
| P  | -8.72761500  | 2.02956600  | 1.31477400  | H | 9.80732800   | -1.57822100 | 3.48662600  |
| C  | -7.33195500  | 2.06140100  | -2.82944500 | H | 10.46277400  | -3.10669900 | 2.77136300  |
| P  | -8.82663700  | 1.44361300  | -1.90394800 | H | 7.03159400   | -2.25641900 | 2.85176900  |
| C  | -9.99378400  | 0.92920900  | -3.26076200 | H | 6.65269100   | -3.07644400 | 1.29469700  |
| Ru | -8.41884100  | -0.06998100 | 0.02060900  | H | 7.80250000   | -3.85713400 | 2.47225100  |

|    |             |             |             |    |              |             |             |
|----|-------------|-------------|-------------|----|--------------|-------------|-------------|
| C  | -6.84575100 | -1.10092300 | 3.29772700  | H  | 7.46082100   | -2.37540800 | -3.90745900 |
| P  | -8.03140900 | -1.58625100 | 1.94590900  | H  | 6.30031200   | -1.61768500 | -2.72604400 |
| C  | -9.53595200 | -2.16097100 | 2.88355100  | H  | 7.24887900   | -0.57821000 | -3.86111100 |
| P  | -8.13142000 | -2.17388200 | -1.27274500 | H  | 11.06428500  | -1.15012600 | -2.39768500 |
| C  | -6.59562300 | -2.32035500 | -2.31824000 | H  | 10.22491900  | -2.01302800 | -3.77356500 |
| C  | -9.48794400 | -2.74110100 | -2.41632200 | H  | 10.09264400  | -0.21244300 | -3.58808400 |
| C  | -7.27472100 | -3.16443400 | 1.25407200  | H  | 10.29481900  | 3.04832900  | -1.38061800 |
| H  | -6.19970600 | -2.94218400 | 1.05456000  | H  | 9.77440000   | 2.34588300  | -2.95208400 |
| C  | -8.00008000 | -3.59985700 | -0.04303100 | H  | 9.14713900   | 3.97629000  | -2.45801900 |
| H  | -7.31091200 | -3.96578600 | 2.02930100  | H  | 6.45670500   | 3.29355300  | -2.80809600 |
| H  | -9.04253000 | -3.92998800 | 0.17864600  | H  | 7.02789600   | 1.71840900  | -3.49135600 |
| H  | -7.48149100 | -4.45835000 | -0.53090900 | H  | 5.75526000   | 1.72530000  | -2.20406600 |
| H  | 7.48298100  | 4.43967500  | -0.45324200 | Cl | 10.96836900  | 0.50422400  | 0.02996000  |
| H  | 6.31638500  | 3.21654900  | 0.15959800  | Cl | -10.87825400 | -0.47798100 | 0.04855600  |
| C  | 7.40153700  | 3.41939100  | -0.00791900 |    |              |             |             |
| H  | 7.75599400  | 3.97561900  | 2.11022500  |    |              |             |             |
| C  | 8.18727900  | 3.31244400  | 1.32265000  |    |              |             |             |
| H  | 9.24936800  | 3.62362400  | 1.17588800  |    |              |             |             |
| C  | 6.67937300  | 2.22823900  | -2.56523800 |    |              |             |             |
| C  | 9.44196300  | 2.96642600  | -2.08850300 |    |              |             |             |
| P  | 8.00107800  | 2.11996300  | -1.24619900 |    |              |             |             |
| C  | 6.69632100  | 1.41173000  | 3.00767500  |    |              |             |             |
| P  | 8.22947000  | 1.52158800  | 1.94015400  |    |              |             |             |
| C  | 9.58523700  | 1.60831800  | 3.22487300  |    |              |             |             |
| Ru | 8.40868100  | 0.07005400  | -0.00925300 |    |              |             |             |
| C  | 7.28013800  | -1.50079200 | -3.23970300 |    |              |             |             |
| P  | 8.63722500  | -1.36510300 | -1.95941900 |    |              |             |             |
| C  | 10.15565600 | -1.17894800 | -3.03689900 |    |              |             |             |
| P  | 8.87380700  | -1.97800500 | 1.22391400  |    |              |             |             |
| C  | 7.45725200  | -2.88927700 | 2.03962400  |    |              |             |             |
| C  | 10.18781600 | -2.04847100 | 2.55219700  |    |              |             |             |
| C  | 8.74796700  | -3.15702000 | -1.35390500 |    |              |             |             |
| H  | 7.69699000  | -3.50791600 | -1.21524900 |    |              |             |             |
| C  | 9.52913400  | -3.24571100 | -0.01946000 |    |              |             |             |
| H  | 9.20648500  | -3.79865400 | -2.14377400 |    |              |             |             |
| H  | 10.60711700 | -3.00428500 | -0.17839300 |    |              |             |             |
| H  | 9.47883300  | -4.27119500 | 0.41880200  |    |              |             |             |
| O  | -1.02194000 | -2.54881000 | 0.08287800  |    |              |             |             |

**Table S10.** Cartesian coordinates of optimized geometry of [3<sup>Cl</sup>]<sup>+</sup>.

|    |             |             |             |   |              |             |             |
|----|-------------|-------------|-------------|---|--------------|-------------|-------------|
| C  | -2.81225400 | 0.48770300  | -0.00609000 | H | 6.55484000   | -3.32781500 | -2.82619200 |
| C  | -3.73219800 | -0.57941500 | 0.04031000  | H | 5.69716600   | -2.17186700 | -1.71000800 |
| C  | -3.19180800 | -1.93680500 | 0.10058300  | H | 9.48200200   | -2.05448400 | -3.39223300 |
| C  | -1.82943500 | -2.17857800 | 0.11491600  | H | 10.47310800  | -2.58350400 | -1.97383400 |
| C  | -1.38920300 | 0.27521000  | 0.00168500  | H | 9.32987300   | -3.75367700 | -2.78247500 |
| C  | -0.87215700 | -1.09102800 | 0.06664900  | H | 9.30344600   | -2.96104200 | 3.57634500  |
| H  | -3.90385100 | -2.78153800 | 0.13536900  | H | 10.33132900  | -2.57660400 | 2.11861600  |
| H  | -3.18953300 | 1.52612000  | -0.05112100 | H | 10.03129100  | -1.31007800 | 3.36210300  |
| H  | -1.44981000 | -3.21715600 | 0.16261200  | H | 5.92781100   | -0.78493200 | 2.84294500  |
| C  | -0.45956100 | 1.35828600  | -0.05464200 | H | 6.66291100   | -2.07087800 | 3.90010100  |
| C  | 0.93786700  | 1.14310600  | -0.04855400 | H | 7.32689100   | -0.38767900 | 3.92592200  |
| C  | 1.45357000  | -0.22508000 | 0.02299200  | H | 6.37693200   | 2.58182000  | 1.91084200  |
| C  | 0.52851500  | -1.30784100 | 0.07852400  | H | 7.26600000   | 1.91207300  | 3.33617500  |
| C  | 1.89514000  | 2.23487900  | -0.11309100 | H | 7.56908500   | 3.62003800  | 2.81370000  |
| C  | 3.25752000  | 2.00093600  | -0.10840800 | H | 10.32115300  | 3.13065600  | 2.82366600  |
| C  | 3.78927200  | 0.64161000  | -0.03258200 | H | 10.13556000  | 1.37030200  | 3.22656700  |
| C  | 2.87587900  | -0.43582000 | 0.03330200  | H | 11.12424600  | 1.85236700  | 1.79637600  |
| H  | 1.51062900  | 3.27092400  | -0.16854300 | H | 10.23303000  | 1.87691100  | -3.86861800 |
| H  | 3.97010800  | 2.84378100  | -0.16097500 | H | 10.86533400  | 0.51675600  | -2.83351300 |
| H  | 3.26130500  | -1.47030400 | 0.09245100  | H | 9.45775500   | 0.24285300  | -3.94653800 |
| C  | 5.20553400  | 0.41490900  | -0.02651700 | H | 6.56855100   | 2.53470300  | -2.10031600 |
| C  | -5.16008300 | -0.36965300 | 0.02918400  | H | 7.58562900   | 2.83940600  | -3.58069000 |
| C  | 6.44790300  | 0.23123200  | -0.02641000 | H | 6.78506100   | 1.22845800  | -3.32155300 |
| C  | -6.39852500 | -0.20477200 | 0.00756800  | H | -10.48127800 | 2.55330900  | -1.98205200 |
| H  | 7.38514500  | -4.00994600 | 1.96941700  | H | -9.36576200  | 3.87480500  | -2.56961300 |
| H  | 6.24558800  | -2.99393500 | 1.01936100  | H | -9.34048900  | 2.24165900  | -3.35146900 |
| C  | 7.32653500  | -3.19901300 | 1.20551400  | H | -6.59136500  | 3.62786200  | -2.43275800 |
| H  | 7.53901800  | -4.46517000 | -0.59925800 | H | -5.73266600  | 2.42587200  | -1.36458500 |
| C  | 8.04596300  | -3.60320400 | -0.10508500 | H | -6.47770500  | 1.87896200  | -2.91010500 |
| H  | 9.09674200  | -3.91619200 | 0.10200800  | H | -10.85404300 | -0.52395900 | -2.85150900 |
| C  | 6.87590400  | -1.17145700 | 3.27725300  | H | -9.51433200  | -0.01519100 | -3.95960500 |
| C  | 9.57865100  | -2.17821700 | 2.83242100  | H | -10.10061300 | -1.72757400 | -3.99892300 |
| P  | 8.06062500  | -1.61395500 | 1.90898200  | H | -6.74489000  | -0.76818000 | -3.47099200 |
| C  | 6.59517500  | -2.32201200 | -2.34820600 | H | -6.36862800  | -2.13855000 | -2.36620700 |
| P  | 8.13895000  | -2.15654600 | -1.31575600 | H | -7.40307100  | -2.42042000 | -3.83995000 |
| C  | 9.49046700  | -2.69250000 | -2.48146100 | H | -7.55870100  | -3.75289400 | 2.59814600  |
| Ru | 8.39414900  | -0.07261900 | 0.00190200  | H | -6.38882300  | -2.49411900 | 1.99342100  |

|    |              |             |             |    |              |             |             |
|----|--------------|-------------|-------------|----|--------------|-------------|-------------|
| C  | 7.34580000   | 2.58800900  | 2.45661200  | H  | -7.52230100  | -2.10606200 | 3.34796300  |
| P  | 8.70304600   | 2.00195900  | 1.32143400  | H  | -11.13514500 | -2.16007900 | 1.38072000  |
| C  | 10.22375700  | 2.10649400  | 2.39546000  | H  | -10.33177900 | -3.47387000 | 2.36552500  |
| P  | 8.78926500   | 1.46068200  | -1.90275300 | H  | -10.34128900 | -1.75284900 | 2.94346000  |
| C  | 7.28901800   | 2.08364800  | -2.81730500 | H  | -10.52804200 | 2.15935700  | 2.34213500  |
| C  | 9.95417800   | 0.97685600  | -3.27335700 | H  | -10.06656300 | 0.86966800  | 3.50794100  |
| C  | 8.87540800   | 3.44552100  | 0.11495000  | H  | -9.49348100  | 2.56915300  | 3.79061600  |
| H  | 7.84180400   | 3.80835500  | -0.09741400 | H  | -6.80663400  | 1.86976000  | 4.02362000  |
| C  | 9.58305300   | 3.01389700  | -1.19345300 | H  | -7.32241400  | 0.13737200  | 3.94001400  |
| H  | 9.41837900   | 4.28139100  | 0.61535100  | H  | -5.98056100  | 0.72251700  | 2.87539500  |
| H  | 10.65360400  | 2.76467400  | -1.00454900 | H  | 0.91452700   | -2.34399000 | 0.13004600  |
| H  | 9.55772000   | 3.82728300  | -1.95668400 | H  | -0.84543700  | 2.39439000  | -0.10668700 |
| H  | -7.74769900  | 3.86998400  | 2.28259500  | Cl | -10.98934300 | 0.41149700  | -0.06480200 |
| H  | -6.48171900  | 3.04151900  | 1.31114700  | Cl | 10.88077300  | -0.45349600 | 0.00462200  |
| C  | -7.58445500  | 3.13042800  | 1.46251100  |    |              |             |             |
| H  | -7.83819100  | 4.51009500  | -0.25612900 |    |              |             |             |
| C  | -8.28042000  | 3.56910700  | 0.15014500  |    |              |             |             |
| H  | -9.36461100  | 3.76587900  | 0.32978200  |    |              |             |             |
| C  | -6.95181500  | 0.99954400  | 3.34155300  |    |              |             |             |
| C  | -9.71517100  | 1.80319100  | 3.01119900  |    |              |             |             |
| P  | -8.18717000  | 1.41853200  | 2.00072900  |    |              |             |             |
| C  | -6.59337900  | 2.57999000  | -2.05175700 |    |              |             |             |
| P  | -8.19004300  | 2.19682400  | -1.15394800 |    |              |             |             |
| C  | -9.47061200  | 2.77989100  | -2.38606700 |    |              |             |             |
| Ru | -8.41178800  | 0.06424800  | -0.00199800 |    |              |             |             |
| C  | -7.41249800  | -2.66660600 | 2.39288200  |    |              |             |             |
| P  | -8.67154500  | -2.05958800 | 1.14923800  |    |              |             |             |
| C  | -10.27827900 | -2.40757700 | 2.04380200  |    |              |             |             |
| P  | -8.67032500  | -1.28984700 | -2.00802000 |    |              |             |             |
| C  | -7.15322800  | -1.70329800 | -3.02353500 |    |              |             |             |
| C  | -9.90909200  | -0.85004900 | -3.33802800 |    |              |             |             |
| C  | -8.59527300  | -3.43500200 | -0.15126400 |    |              |             |             |
| H  | -7.51213000  | -3.63863500 | -0.33093900 |    |              |             |             |
| C  | -9.28934200  | -2.99470000 | -1.46418400 |    |              |             |             |
| H  | -9.04303300  | -4.37223500 | 0.25736300  |    |              |             |             |
| H  | -10.39099900 | -2.89839700 | -1.31232700 |    |              |             |             |
| H  | -9.13118900  | -3.73744600 | -2.28250000 |    |              |             |             |
| H  | 6.59701800   | -1.53931500 | -3.14038500 |    |              |             |             |

**Table S11.** Cartesian coordinates of optimized geometry of  $[1^{\text{C4}}]^+$ .

|   |             |             |             |   |              |             |             |
|---|-------------|-------------|-------------|---|--------------|-------------|-------------|
| C | -2.87861900 | 0.43625700  | 0.06049600  | H | -9.45141500  | -3.73691300 | -2.44631400 |
| C | -3.75995600 | -0.62146400 | -0.25042100 | C | -11.76063000 | 0.28511600  | 0.22373600  |
| C | -3.19220800 | -1.90410900 | -0.64683500 | C | -13.13814500 | 0.43900400  | 0.30721300  |
| C | -1.82361200 | -2.09814800 | -0.69672700 | C | 11.76693900  | -0.49307100 | -0.13468600 |
| C | -1.45069700 | 0.27317300  | 0.00064300  | C | 13.13774400  | -0.72083700 | -0.19098900 |
| C | -0.89874700 | -1.03134100 | -0.35948600 | C | 14.35253700  | -0.92259300 | -0.24069900 |
| H | -3.87862500 | -2.72890600 | -0.90910300 | C | -14.35898900 | 0.57561700  | 0.38103500  |
| H | -3.29577700 | 1.40895200  | 0.36963300  | H | -15.43714400 | 0.69623900  | 0.44631600  |
| H | -1.41935600 | -3.07674900 | -1.00721000 | H | 15.42283100  | -1.10034400 | -0.28458200 |
| C | -0.54728700 | 1.34089400  | 0.29098200  | H | 6.24801900   | -3.15948100 | 0.47786400  |
| C | 0.86255900  | 1.16394600  | 0.28404000  | H | 6.59492100   | -3.62607000 | 2.19775900  |
| C | 1.41560100  | -0.13872500 | -0.07671400 | H | 5.81517300   | -2.02510100 | 1.80765300  |
| C | 0.50823700  | -1.20618400 | -0.36922200 | H | 9.02914000   | -3.99611400 | 0.12651400  |
| C | 1.78871100  | 2.22489600  | 0.62476200  | H | 10.39800300  | -3.12415600 | 0.92485700  |
| C | 3.15713400  | 2.02208600  | 0.58191900  | H | 9.27180100   | -4.16071800 | 1.91205300  |
| C | 3.73237200  | 0.74035100  | 0.18953200  | H | 10.30856700  | 2.06181000  | 3.81111200  |
| C | 2.84278700  | -0.30618200 | -0.12802000 | H | 11.07020400  | 0.82770200  | 2.70836200  |
| H | 1.38940900  | 3.20600700  | 0.93480700  | H | 10.74484000  | 2.49065600  | 2.10135100  |
| H | 3.84275100  | 2.84608900  | 0.84988400  | H | 6.57356800   | 2.44302100  | 2.31000200  |
| H | 3.25512400  | -1.28150100 | -0.43484500 | H | 7.65440700   | 2.78467100  | 3.73555500  |
| C | 5.16325700  | 0.56502400  | 0.13539300  | H | 8.00842800   | 3.53144200  | 2.12623500  |
| C | -5.18588800 | -0.44766200 | -0.17772800 | H | 6.55031500   | 3.23442200  | -0.93608500 |
| C | 6.39800900  | 0.38054900  | 0.08347300  | H | 7.91190700   | 4.10601000  | -0.12456600 |
| C | -6.42993300 | -0.31023300 | -0.12076300 | H | 7.68411200   | 4.27416200  | -1.91180400 |
| H | 8.50649300  | 0.20832200  | 4.48613700  | H | 10.36123400  | 3.73818900  | -2.18397900 |
| H | 7.03048800  | -0.10162000 | 3.50825900  | H | 10.69878500  | 3.27016100  | -0.46258900 |
| C | 8.14653700  | -0.11745400 | 3.48100900  | H | 11.13832600  | 2.13725700  | -1.79141000 |
| H | 8.24805000  | -2.30875700 | 3.80850000  | H | 9.30532700   | -2.67208800 | -3.72743200 |
| C | 8.66324700  | -1.53287400 | 3.12195400  | H | 10.37785600  | -2.33673400 | -2.29460800 |
| H | 9.77537200  | -1.57736300 | 3.20965400  | H | 8.93849900   | -3.42058000 | -2.12190800 |
| C | 7.62312400  | 2.61859500  | 2.63332600  | H | 5.88383600   | -0.71538300 | -2.71313000 |
| C | 10.36031400 | 1.68199700  | 2.76409300  | H | 6.65085200   | -1.94658200 | -3.81610600 |
| P | 8.67076700  | 1.14067300  | 2.16736700  | H | 6.20862300   | -2.37978200 | -2.10909700 |
| C | 6.56393400  | -2.77718600 | 1.47551400  | H | -10.68228300 | 2.66763600  | -1.49104400 |
| P | 8.24643800  | -1.97031700 | 1.32665200  | H | -9.57596800  | 3.91287100  | -2.22618500 |
| C | 9.34464100  | -3.45887000 | 1.04857200  | H | -9.76984600  | 2.29074100  | -3.00718400 |
| C | 10.53459900 | -0.27710700 | -0.07955900 | H | -6.82656100  | 3.59203500  | -2.39349000 |

|    |              |             |             |   |              |             |             |
|----|--------------|-------------|-------------|---|--------------|-------------|-------------|
| Ru | 8.47470400   | 0.05678800  | 0.00208700  | H | -5.89267000  | 2.31339600  | -1.49193600 |
| C  | 7.60431100   | 3.57054300  | -1.05036200 | H | -6.83822200  | 1.86801200  | -2.96333400 |
| P  | 8.70453200   | 2.08217200  | -1.32216600 | H | -11.03114700 | -0.45785500 | -2.80675300 |
| C  | 10.38772200  | 2.88882800  | -1.46213900 | H | -9.68751600  | 0.09880400  | -3.89102000 |
| P  | 8.28170800   | -1.02848700 | -2.16427000 | H | -10.32173800 | -1.58819700 | -4.04410800 |
| C  | 6.59448500   | -1.56901600 | -2.76850100 | H | -6.92671300  | -0.78960400 | -3.52268100 |
| C  | 9.32968500   | -2.50791000 | -2.62475200 | H | -6.57844000  | -2.24280300 | -2.51572400 |
| C  | 8.29660900   | 1.64495700  | -3.11969700 | H | -7.64889200  | -2.39195700 | -3.98242000 |
| H  | 7.18501300   | 1.69105300  | -3.21390300 | H | -7.36615200  | -4.07602000 | 2.26295400  |
| C  | 8.81349800   | 0.22880900  | -3.47547200 | H | -6.25590500  | -2.83060900 | 1.53311700  |
| H  | 8.71705500   | 2.42002400  | -3.80396300 | H | -7.17624400  | -2.45372300 | 3.04440600  |
| H  | 9.92959700   | 0.21172900  | -3.49667800 | H | -11.04568000 | -2.48036100 | 1.51011000  |
| H  | 8.45875600   | -0.09696600 | -4.48244300 | H | -10.11198400 | -3.75301900 | 2.41945700  |
| H  | -7.48309800  | 3.57343000  | 2.47692500  | H | -10.10881400 | -2.02730700 | 2.98421500  |
| H  | -6.34799800  | 2.73870900  | 1.35996500  | H | -10.35927600 | 2.08984400  | 2.52999100  |
| C  | -7.42720700  | 2.87963200  | 1.60516300  | H | -10.02551200 | 0.63204400  | 3.53498500  |
| H  | -7.73502400  | 4.37369500  | -0.00044500 | H | -9.29828500  | 2.22953400  | 4.00400000  |
| C  | -8.20421600  | 3.43954600  | 0.38856400  | H | -6.63044800  | 1.42521700  | 4.08325300  |
| H  | -9.25247000  | 3.69423700  | 0.67339600  | H | -7.26188900  | -0.26220600 | 3.92415700  |
| C  | -6.84931200  | 0.60463600  | 3.36147200  | H | -5.91151400  | 0.29691600  | 2.84943300  |
| C  | -9.58791800  | 1.57913100  | 3.14672100  | O | 1.03103500   | -2.44385400 | -0.76424500 |
| P  | -8.09264000  | 1.19000400  | 2.10307200  | O | -1.07661900  | 2.57620700  | 0.68169900  |
| C  | -6.82058200  | 2.52683500  | -2.06593000 | C | 1.34980700   | -3.46548100 | 0.12232800  |
| P  | -8.31302900  | 2.17137900  | -1.00585700 | C | -1.36042300  | 3.61143000  | -0.20252900 |
| C  | -9.72437100  | 2.82523200  | -2.03306700 | C | 1.08028500   | -3.22566200 | 1.60652000  |
| C  | -10.51959800 | 0.14788400  | 0.15527400  | H | 1.65555600   | -2.34668300 | 1.97551200  |
| Ru | -8.45727500  | -0.08237800 | 0.01370500  | H | 0.00029200   | -3.02040200 | 1.78415700  |
| C  | -7.21652200  | -2.98848300 | 2.07020900  | H | 1.38557300   | -4.13451400 | 2.16506700  |
| P  | -8.62191700  | -2.33351000 | 1.03569200  | C | -1.02865700  | 3.39435300  | -1.67735700 |
| C  | -10.11953900 | -2.68881100 | 2.08871200  | H | 0.06315400   | 3.22168500  | -1.81273600 |
| P  | -8.84523100  | -1.35227200 | -2.07463400 | H | -1.56224900  | 2.50366400  | -2.07926100 |
| C  | -7.35651000  | -1.73797300 | -3.12880300 | H | -1.33544900  | 4.30115000  | -2.23838900 |
| C  | -10.09711800 | -0.76708600 | -3.32470200 | O | 1.81451500   | -4.47672800 | -0.34218400 |
| C  | -8.72719400  | -3.60151500 | -0.35897300 | O | -1.84619900  | 4.61421100  | 0.25823000  |
| H  | -7.67824600  | -3.85220100 | -0.64485600 |   |              |             |             |
| C  | -9.50692800  | -3.04299900 | -1.57459400 |   |              |             |             |
| H  | -9.19300900  | -4.53760100 | 0.02950100  |   |              |             |             |
| H  | -10.58613900 | -2.90397600 | -1.32802000 |   |              |             |             |

**Table S12.** Cartesian coordinates of optimized geometry of  $[2^{C4}]^+$ .

|   |             |             |             |   |              |             |             |
|---|-------------|-------------|-------------|---|--------------|-------------|-------------|
| C | -2.84281300 | 0.37880600  | 0.01590900  | H | -9.14656800  | -4.25239200 | -1.28427100 |
| C | -3.75728400 | -0.72116200 | 0.02645300  | O | 1.04037800   | -2.53039300 | 0.02174600  |
| C | -3.19403900 | -2.04186900 | 0.03531800  | O | -0.99178200  | 2.53727100  | -0.00474900 |
| C | -1.80600100 | -2.24161200 | 0.03183200  | C | -11.79393200 | 0.50270100  | -0.00480200 |
| C | -1.44738500 | 0.18157600  | 0.01279600  | C | -13.16858800 | 0.71401500  | -0.00784700 |
| C | -0.90844500 | -1.14162100 | 0.02040200  | C | 11.76449100  | -0.51427600 | -0.02761600 |
| H | -3.87463600 | -2.91235700 | 0.04499800  | C | 13.13428500  | -0.73261800 | -0.03183900 |
| H | -3.22963400 | 1.41179800  | 0.00965100  | C | 14.35004200  | -0.92663100 | -0.03577900 |
| H | -1.38720700 | -3.26335600 | 0.03806600  | C | -14.38661600 | 0.90147200  | -0.00991700 |
| C | -0.54091200 | 1.39549400  | 0.00170000  | H | -15.45984000 | 1.06657000  | -0.01202100 |
| C | 0.95116600  | 1.14530800  | -0.00082500 | H | 15.42344000  | -1.09787900 | -0.03924300 |
| C | 1.48186800  | -0.17723100 | 0.00600400  | H | 7.06840500   | 1.29392000  | 3.39829500  |
| C | 0.57084000  | -1.39358200 | 0.01653800  | H | 7.58225800   | 3.03506300  | 3.44784100  |
| C | 1.83992400  | 2.25043400  | -0.01000100 | H | 6.46703600   | 2.43545600  | 2.13709400  |
| C | 3.22992400  | 2.05214700  | -0.01166700 | H | 9.96869100   | 0.80959200  | 3.68065900  |
| C | 3.78013400  | 0.73033500  | -0.00507800 | H | 11.14069600  | 1.36054500  | 2.41631800  |
| C | 2.87907400  | -0.37418800 | 0.00292600  | H | 10.31601900  | 2.57634400  | 3.49199800  |
| H | 1.41628600  | 3.26967800  | -0.01535500 | H | 10.31451900  | 3.12109000  | -2.99627800 |
| H | 3.91279700  | 2.92048800  | -0.01844600 | H | 11.14469500  | 2.21713200  | -1.65044500 |
| H | 3.26731300  | -1.40651000 | 0.00805300  | H | 10.52550500  | 1.31851100  | -3.08492600 |
| C | 5.21112900  | 0.51780000  | -0.00564200 | H | 6.42943800   | 1.99421500  | -2.55646100 |
| C | -5.18234300 | -0.50959400 | 0.02645200  | H | 7.54547400   | 3.19900800  | -3.34205100 |
| C | 6.44326500  | 0.32359700  | 0.00169800  | H | 7.67296000   | 1.44251700  | -3.75573900 |
| C | -6.41767800 | -0.32191600 | 0.01047300  | H | 5.83697600   | -1.32504700 | -2.45114200 |
| H | 8.80941900  | 4.37385000  | -1.10823800 | H | 7.02199800   | -0.79934400 | -3.71464800 |
| H | 7.36655000  | 3.60944300  | -0.35676800 | H | 6.65046900   | -2.55971900 | -3.51453000 |
| C | 8.46332600  | 3.48982900  | -0.52234400 | H | 9.38164200   | -3.03257600 | -3.46758500 |
| H | 8.98618600  | 4.23346600  | 1.49714500  | H | 9.91885100   | -1.29863600 | -3.40419700 |
| C | 9.21874300  | 3.37493600  | 0.82430100  | H | 10.49544600  | -2.45648100 | -2.14619800 |
| H | 10.32224300 | 3.37710100  | 0.65944300  | H | 9.42263200   | -3.19572900 | 3.31786900  |
| C | 7.46039600  | 2.16445100  | -2.93629000 | H | 10.54697200  | -2.00766900 | 2.51985000  |
| C | 10.32829200 | 2.17705500  | -2.40422900 | H | 9.31861900   | -1.43605000 | 3.72504900  |
| P | 8.68741000  | 1.93067600  | -1.55396200 | H | 5.82338600   | -2.18297600 | 1.64527700  |
| C | 7.33805700  | 2.17850900  | 2.77816000  | H | 6.65420700   | -3.10414300 | 2.97965700  |
| P | 8.80830100  | 1.76101500  | 1.71092600  | H | 6.46152100   | -1.30034300 | 3.08110000  |
| C | 10.19587000 | 1.61238400  | 2.94556800  | H | -10.56834500 | 1.93892600  | -2.54784100 |
| C | 10.52856500 | -0.31484800 | -0.02994000 | H | -9.42943600  | 3.05795600  | -3.42376500 |



|    |              |             |             |   |              |             |             |
|----|--------------|-------------|-------------|---|--------------|-------------|-------------|
| Ru | 8.48849300   | 0.00447100  | -0.01157800 | H | -9.40646700  | 1.28258100  | -3.77094400 |
| C  | 6.78033900   | -1.59332300 | -2.97467400 | H | -6.69091900  | 2.89060500  | -3.19747800 |
| P  | 8.15981900   | -1.75133100 | -1.73258100 | H | -5.82128600  | 1.99971000  | -1.86701800 |
| C  | 9.63233000   | -2.18306800 | -2.79136700 | H | -6.54285900  | 1.08120300  | -3.23675600 |
| P  | 8.28184100   | -1.92169500 | 1.53270100  | H | -11.09527800 | -1.34488700 | -2.45521400 |
| C  | 6.64513600   | -2.15635600 | 2.39355000  | H | -9.84965100  | -0.99722600 | -3.71976800 |
| C  | 9.51647500   | -2.16392200 | 2.90710000  | H | -10.31190500 | -2.71119500 | -3.37004200 |
| C  | 7.73246100   | -3.36009800 | -0.84516800 | H | -7.01164100  | -1.56343900 | -3.28951100 |
| H  | 6.62928700   | -3.35014000 | -0.67875200 | H | -6.50714400  | -2.63708500 | -1.93425800 |
| C  | 8.48868300   | -3.48292000 | 0.50031400  | H | -7.62348700  | -3.27176900 | -3.22762400 |
| H  | 7.95492200   | -4.22115200 | -1.51821500 | H | -7.55632100  | -3.06552200 | 3.44516300  |
| H  | 9.58391800   | -3.61469400 | 0.33322300  | H | -6.41846400  | -1.94024500 | 2.57528200  |
| H  | 8.13427700   | -4.36336900 | 1.08658300  | H | -7.58842600  | -1.29081000 | 3.79445500  |
| H  | -7.82562600  | 4.24121100  | 1.30217700  | H | -11.16245000 | -2.01773500 | 1.87484600  |
| H  | -6.54789700  | 3.25565000  | 0.51303200  | H | -10.29511300 | -2.90149500 | 3.21129600  |
| C  | -7.64970500  | 3.33489500  | 0.67497100  | H | -10.45055200 | -1.09240000 | 3.24456100  |
| H  | -7.99560600  | 4.25564700  | -1.31269900 | H | -10.47305200 | 2.64052000  | 1.94068500  |
| C  | -8.39344500  | 3.42611500  | -0.68066400 | H | -9.98363900  | 1.55976500  | 3.29542900  |
| H  | -9.48014200  | 3.62533800  | -0.52018500 | H | -9.36067400  | 3.26458100  | 3.24211400  |
| C  | -6.83919900  | 1.69435200  | 2.93969200  | H | -6.67367800  | 2.70031200  | 3.39141700  |
| C  | -9.63597100  | 2.37821300  | 2.62424400  | H | -7.14612500  | 0.98995900  | 3.74467800  |
| P  | -8.16900700  | 1.78199300  | 1.62678100  | H | -5.89349200  | 1.32708500  | 2.48385500  |
| C  | -6.67904300  | 1.96627500  | -2.57401900 |   |              |             |             |
| P  | -8.27935300  | 1.78681200  | -1.61989300 |   |              |             |             |
| C  | -9.54570100  | 2.04510800  | -2.97206200 |   |              |             |             |
| C  | -10.55645400 | 0.31193600  | 0.00971400  |   |              |             |             |
| Ru | -8.49122600  | -0.00496200 | 0.00930800  |   |              |             |             |
| C  | -7.44235500  | -2.05163300 | 2.99517700  |   |              |             |             |
| P  | -8.70396600  | -1.79625200 | 1.63778600  |   |              |             |             |
| C  | -10.30767800 | -1.97892700 | 2.58525600  |   |              |             |             |
| P  | -8.81404700  | -1.79138600 | -1.60873100 |   |              |             |             |
| C  | -7.34975900  | -2.38215300 | -2.61371800 |   |              |             |             |
| C  | -10.14947700 | -1.70585300 | -2.91584100 |   |              |             |             |
| C  | -8.58327400  | -3.43543500 | 0.69921700  |   |              |             |             |
| H  | -7.49578800  | -3.63096900 | 0.53962400  |   |              |             |             |
| C  | -9.32631600  | -3.34689900 | -0.65697100 |   |              |             |             |
| H  | -8.97905300  | -4.26609300 | 1.33109300  |   |              |             |             |
| H  | -10.42853400 | -3.27236100 | -0.49559900 |   |              |             |             |

**Table S13.** Cartesian coordinates of optimized geometry of  $[3^{\text{C4}}]^+$ .

|   |             |             |             |   |              |             |             |
|---|-------------|-------------|-------------|---|--------------|-------------|-------------|
| C | -2.88281900 | -0.39130500 | 0.13723700  | H | -9.45134800  | 4.33738000  | 0.75331700  |
| C | -3.77901900 | 0.68525500  | -0.04312000 | C | -11.75289700 | -0.50584700 | -0.02535600 |
| C | -3.22705500 | 2.02067800  | -0.26014400 | C | -13.12594800 | -0.71640300 | -0.02927200 |
| C | -1.86120700 | 2.23229800  | -0.29290800 | C | 11.78742100  | 0.44932000  | -0.14510000 |
| C | -1.45656700 | -0.20366200 | 0.11062000  | C | 13.16391700  | 0.63904400  | -0.20161000 |
| C | -0.92039800 | 1.13975500  | -0.11230100 | C | 14.38392300  | 0.80723700  | -0.25106200 |
| H | -3.92685700 | 2.86431700  | -0.39999700 | C | -14.34227400 | -0.90310500 | -0.03304800 |
| H | -3.28336000 | -1.40845300 | 0.30244900  | H | -15.41648500 | -1.06788400 | -0.03632800 |
| H | -1.46173300 | 3.25054700  | -0.46004400 | H | 15.45868800  | 0.95550400  | -0.29473200 |
| C | -0.54852700 | -1.28626100 | 0.29278200  | H | 6.46291000   | 2.13517100  | -2.61917800 |
| C | 0.85548900  | -1.09317800 | 0.26049300  | H | 6.75237900   | 1.23616500  | -4.16953800 |
| C | 1.39286600  | 0.24734500  | 0.03338800  | H | 5.89011300   | 0.43423400  | -2.77716300 |
| C | 0.48072600  | 1.33091100  | -0.14577800 | H | 9.31397700   | 2.75456200  | -2.88861800 |
| C | 1.79570100  | -2.18103600 | 0.44405100  | H | 10.57229300  | 1.45751300  | -2.86525600 |
| C | 3.16167300  | -1.96346700 | 0.40410200  | H | 9.46097600   | 1.62824900  | -4.29828400 |
| C | 3.72145400  | -0.63338600 | 0.17362700  | H | 10.28717100  | -4.09242000 | -1.37774900 |
| C | 2.82014900  | 0.43408600  | -0.00408400 | H | 11.04816100  | -2.43885100 | -1.45418000 |
| H | 1.40023200  | -3.19990300 | 0.61852600  | H | 10.75405100  | -3.21450000 | 0.14207000  |
| H | 3.85968300  | -2.80815200 | 0.54754200  | H | 6.58878500   | -3.31693200 | 0.07207600  |
| H | 3.21421800  | 1.45204500  | -0.18015200 | H | 7.63751300   | -4.55812200 | -0.75109000 |
| C | 5.15463900  | -0.44550600 | 0.13086100  | H | 8.05178800   | -3.97724100 | 0.91158600  |
| C | -5.20114000 | 0.48049600  | -0.01928000 | H | 6.39320900   | -1.48505600 | 2.85546400  |
| C | 6.39119800  | -0.27578500 | 0.08458500  | H | 7.66418300   | -2.76991200 | 2.88721200  |
| C | -6.44374700 | 0.30874800  | -0.00033000 | H | 7.50120000   | -1.64159100 | 4.29335800  |
| H | 8.40602300  | -3.24663800 | -3.09831700 | H | 10.20653200  | -1.23551700 | 4.16844400  |
| H | 6.97834400  | -2.28071500 | -2.58373600 | H | 10.51200600  | -2.12314800 | 2.61441700  |
| C | 8.09434700  | -2.29611800 | -2.60278400 | H | 11.06556900  | -0.41728100 | 2.78480400  |
| H | 8.20611300  | -0.96406000 | -4.37311200 | H | 9.34505500   | 4.54431300  | 0.75235000  |
| C | 8.64586400  | -1.05705300 | -3.35155900 | H | 10.39327300  | 3.29571400  | -0.05903600 |
| H | 9.75213600  | -1.13893100 | -3.47830200 | H | 8.94260000   | 3.96355500  | -0.91311600 |
| C | 7.63236700  | -3.67237900 | -0.07368900 | H | 5.91160300   | 2.45540800  | 1.42780500  |
| C | 10.34844300 | -3.09244800 | -0.88828500 | H | 6.68989300   | 4.10189100  | 1.36063900  |
| P | 8.66050300  | -2.28805600 | -0.79764300 | H | 6.22787200   | 3.23115500  | -0.16466000 |
| C | 6.70161900  | 1.13995100  | -3.05984700 | H | -10.61972900 | -1.86623600 | 2.55951000  |
| P | 8.33208800  | 0.53409500  | -2.36850700 | H | -9.48453200  | -2.72586000 | 3.69458300  |
| C | 9.53766600  | 1.70664300  | -3.18853100 | H | -9.65397500  | -0.92526200 | 3.76688700  |
| C | 10.54930900 | 0.26801400  | -0.09016800 | H | -6.73788600  | -2.36955900 | 3.64656600  |

|    |              |             |             |   |              |             |             |
|----|--------------|-------------|-------------|---|--------------|-------------|-------------|
| Ru | 8.48153200   | -0.00365400 | -0.00168500 | H | -5.83425200  | -1.58376200 | 2.27300900  |
| C  | 7.42876300   | -1.72354500 | 3.18356900  | H | -6.73694800  | -0.56361800 | 3.45549400  |
| P  | 8.62583100   | -0.54137000 | 2.36482900  | H | -11.08046100 | 1.47294000  | 2.36857800  |
| C  | 10.26010300  | -1.13312900 | 3.05945600  | H | -9.76186600  | 1.39278100  | 3.61026700  |
| P  | 8.30316400   | 2.28252700  | 0.79314300  | H | -10.38289900 | 3.00246400  | 3.06655200  |
| C  | 6.62237600   | 3.10322400  | 0.86929700  | H | -6.98862300  | 2.05987800  | 2.97213700  |
| C  | 9.35019600   | 3.65719600  | 0.07670300  | H | -6.60870900  | 2.99073800  | 1.47698700  |
| C  | 8.29806900   | 1.04755200  | 3.34630600  | H | -7.70374400  | 3.71400100  | 2.74171500  |
| H  | 7.19040200   | 1.12666100  | 3.46271000  | H | -7.46518000  | 2.72083700  | -3.72471000 |
| C  | 8.85424700   | 2.28792500  | 2.60320100  | H | -6.32429900  | 1.85832700  | -2.59705000 |
| H  | 8.72896000   | 0.95498200  | 4.37169200  | H | -7.30082200  | 0.91991200  | -3.79760200 |
| H  | 9.97040900   | 2.27338200  | 2.59331800  | H | -11.10871700 | 1.59918500  | -2.27945200 |
| H  | 8.53858300   | 3.23774500  | 3.09750000  | H | -10.20537400 | 2.36596700  | -3.66299300 |
| H  | -7.48368900  | -4.33905800 | -0.77495900 | H | -10.22210300 | 0.56141400  | -3.45866100 |
| H  | -6.33545700  | -3.13434700 | -0.09604700 | H | -10.33271200 | -3.00243800 | -1.47664400 |
| C  | -7.41741900  | -3.35110000 | -0.26102900 | H | -9.97266800  | -2.06579800 | -2.97280900 |
| H  | -7.72786200  | -4.06213700 | 1.81308100  | H | -9.24757100  | -3.71720300 | -2.75400100 |
| C  | -8.18987500  | -3.35886500 | 1.08095200  | H | -6.57831300  | -3.00978800 | -3.10153900 |
| H  | -9.24421600  | -3.69056200 | 0.92859600  | H | -7.19646700  | -1.39650000 | -3.63748700 |
| C  | -6.80096700  | -1.96938000 | -2.76962100 | H | -5.86873000  | -1.48445500 | -2.40614700 |
| C  | -9.54765200  | -2.77958700 | -2.23170900 | H | 0.88240800   | 2.34813200  | -0.31623700 |
| P  | -8.06847800  | -2.00234500 | -1.40382700 | H | -0.95019200  | -2.30357900 | 0.46305000  |
| C  | -6.74463000  | -1.53392800 | 2.90927500  | H | -10.60155900 | 3.13713900  | 0.07105900  |
| P  | -8.26883000  | -1.63193500 | 1.83910300  |   |              |             |             |
| C  | -9.64274400  | -1.80508000 | 3.08679400  |   |              |             |             |
| C  | -10.51681400 | -0.31938400 | -0.02847000 |   |              |             |             |
| Ru | -8.45632400  | 0.00092500  | -0.01047100 |   |              |             |             |
| C  | -7.30502800  | 1.79990700  | -3.11766000 |   |              |             |             |
| P  | -8.67015700  | 1.62968000  | -1.86009200 |   |              |             |             |
| C  | -10.20207500 | 1.53559300  | -2.91976600 |   |              |             |             |
| P  | -8.87479300  | 1.99921800  | 1.38276600  |   |              |             |             |
| C  | -7.40237200  | 2.77383300  | 2.22479100  |   |              |             |             |
| C  | -10.15313400 | 1.96242600  | 2.73837200  |   |              |             |             |
| C  | -8.74380800  | 3.35650400  | -1.10188800 |   |              |             |             |
| H  | -7.68850100  | 3.68398600  | -0.94702700 |   |              |             |             |
| C  | -9.51915500  | 3.35001500  | 0.23845900  |   |              |             |             |
| H  | -9.20203800  | 4.06205300  | -1.83421900 |   |              |             |             |
